# Supplementary material for: A palladium catalyzed asymmetric desymmetrization approach to enantioenriched 1,3-disubstituted isoindolines
Source: Royal Society of Chemistry journal article supplement (doi:10.1039/d3sc03496h), 2023-01-01
Supplement: d3sc03496h1.pdf [file d3sc03496h1.pdf]

Supplementary Information for

**Palladium Catalyzed Asymmetric Desymmetrization Approach to  
Enantioenriched 1,3-disubstituted Isoindolines**

Dattatraya H. Dethé\*, Vimlesh kumar and Manmohan Shukla

Department of Chemistry, Indian Institute of Technology-Kanpur, Kanpur - 208016, India.  
Tel: + 91-512-2596537, fax: + 91-512-2597436.

# Contents

|                                                                                                             |       |
|-------------------------------------------------------------------------------------------------------------|-------|
| 1. General information.....                                                                                 | 3     |
| 2. Experimental procedure for the preparation of starting material                                          |       |
| 2.1 General procedure for preparation of Diarylmethyltriflamides.....                                       | 4     |
| 2.2 General procedure for the synthesis of Diarylmethylamine.....                                           | 4-5   |
| 2.3 General procedure for preparation of substrates substituted with F, and Cl...5                          |       |
| 2.4 Examples with spectral data.....                                                                        | 5-6   |
| 3. Experimental procedure and characterization of products                                                  |       |
| 3.1 General procedure for Pd(II)-Catalysed racemic synthesis of 1,3 disubstituted isoindoline.....          | 6     |
| 3.2 General procedure for Pd(II)-Catalysed enantioselective synthesis of 1,3 disubstituted isoindoline..... | 6     |
| 3.3 Gram scale synthesis of (+) enantiomer of 1,3 disubstituted isoindoline.....                            | 7     |
| 3.4 Gram scale synthesis of (-) enantiomer of 1,3 disubstituted isoindoline.....                            | 7-8   |
| 3.5 Deuterium labelling experiment.....                                                                     | 8-9   |
| 3.6 Detection of intermediate D.....                                                                        | 10    |
| 3.7 Examples with spectral data.....                                                                        | 10-14 |
| 4. NMR spectra of starting material 1.....                                                                  | 15-22 |
| 5. NMR spectra of compounds 3 and 4.....                                                                    | 23-47 |
| 6. HPLC spectra of compounds 3 and 4.....                                                                   | 48-72 |
| 7. Crystallographic Data of 3a.....                                                                         | 73-79 |

## 1. General Information

**General Aspects:** Experiments involving moisture and air-sensitive components were performed in oven-dried glassware. Commercial solvents and reagents were used without further purification unless otherwise noted. Yields refer to chromatographically pure compounds unless otherwise stated. Reactions were monitored by thin-layer chromatography (TLC) carried out on 0.25 mm Merck silica gel plates (60F-254) using UV light as a visualizing agent and a p-anisaldehyde or ninhydrin stain, and heat as developing agents. Merck silica gel (particle size 100-200 and 230-400 mesh) was used for flash column chromatography. Neat compounds were used for record IR spectra. NMR spectra were recorded on either a Bruker Avance 400 ( $^1\text{H}$ , 400 MHz;  $^{13}\text{C}$ , 100 MHz), Bruker Avance 500 ( $^1\text{H}$ , 500 MHz;  $^{13}\text{C}$ , 125 MHz), or JEOL DELTA (ECX) 500 ( $^1\text{H}$ , 500 MHz;  $^{13}\text{C}$ , 125 MHz). Mass spectrometric data were obtained using Agilent-Premier-APCI-MS instruments and IR data recorded from PerkinElmer, FT-IR spectrometer. Optical rotations were measured using a Polarimeter (AUTOPOL II) at 28 °C. The following abbreviations were used to explain the multiplicities: s = singlet, d = doublet, t = triplet, q = quartet, spt = septet, dd = doublet of doublet, ddd = doublet of a doublet of a doublet, dt = doublet of a triplet, td = triplet of a doublet, m = multiplet, br = broad.

## Experimental procedure for preparation of starting material:

### 2.1 General procedure for preparation of Diarylmethyltriflamides.<sup>3</sup>

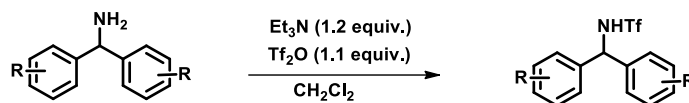

To a stirred solution of diarylmethylamine (5 mmol, 1.0 equiv.) in dichloromethane (20 mL) was added triethylamine (6 mmol, 1.2 equiv) at  $-78\text{ }^{\circ}\text{C}$  under nitrogen. After stirring for 5 min at  $-78\text{ }^{\circ}\text{C}$ , trifluoromethanesulfonic anhydride (5.5 mmol, 1.1 equiv.) was added dropwise and the mixture was stirred for 1h at the same temperature before being quenched by water (20 mL). The organic layer was separated and the aqueous layer was extracted with dichloromethane (10 mL  $\times$  2). The combined organic phase was washed with brine (20 mL) and then dried over  $\text{Na}_2\text{SO}_4$ . Evaporation and column chromatography on silica gel (ethyl acetate/hexane= 1:20 as eluant) afforded corresponding trifluoromethanesulfonamide.

### 2.2 General procedure for preparation of diarylmethylamines.<sup>1</sup>

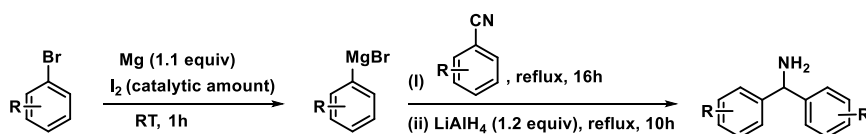

To a stirred solution of Mg (1.1 equiv),  $\text{I}_2$  (catalytic amount) in anhydrous THF (20 ml) was added arylbromide (1.0 equiv.) dropwise. The resulting solution was stirred for another 1h at room temperature. Then this solution was added dropwise into corresponding aryl nitrile in THF (10 ml) at room temperature. The resulting mixture was heated to reflux for 12h and then allowed to cool to room temperature and then to  $0\text{ }^{\circ}\text{C}$ . To this mixture was transferred a suspension of  $\text{LiAlH}_4$  (20 mmol) in THF (20 mL) via cannula. The ice bath was then removed, and the reaction mixture was heated to reflux, which was maintained for 12h. Upon completion, the mixture was cooled to room temperature, and carefully quenched by slow addition of water (5 ml), The resulting slurry was filtered through a celite pad and washed with DCM until no amine was left. The combined organic layer was washed with sat. aq. NaCl and concentrated under reduced pressure to give the crude amine, which could be used directly in the next step without purification. And the corresponding trifluoromethane sulfonamides **1a**, **1c**, **1h**, **1j**, **1k**, **1l**, **1m** and **1n** could be synthesized using the same protocol shown above.

### 2.3 General procedure for preparation of biarylamine substituted with F and Cl.<sup>1</sup>

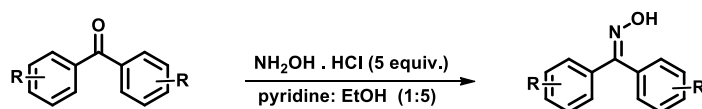

To a 25 ml round bottom flask has added the ketone (1.5 mmol), hydroxylamine hydrochloride (7.5 mmol, 0.52 g), pyridine (1 ml), and EtOH (5 ml). The resulting solution was heated in an oil bath to reflux for 6h. After completion of the reaction, the solvent was removed in vacuo and the residue was partitioned between EtOAc and  $\text{H}_2\text{O}$  (1:1). The aqueous layer was extracted with EtOAc twice, and the combined organic layer was washed with brine and dried over  $\text{Na}_2\text{SO}_4$ . Evaporation afforded the crude oxime, which could be used directly into the next step without purification.



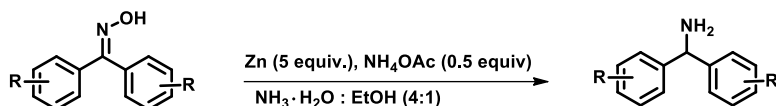

To a stirred suspension of oxime (3 mmol) in EtOH (4 ml) and ammonia solution (ammonium hydroxide solution) (16 ml) was added  $\text{NH}_4\text{OAc}$  (1.5 mmol, 0.12 g), followed by portion-wise addition of zinc powder (15.0 mmol, 0.98 g). The mixture was heated to  $50^\circ\text{C}$  in an oil bath for 1h and then refluxed for 10h. The mixture was cooled to room temperature, diluted with 20 ml of EtOAc, stirred for 30 min, and filtered through filter paper. The filtrate was transferred to a separation funnel. The organic layer was collected, and the aqueous layer was extracted with EtOAc ( $2 \times 20$  ml). The combined organic layer was dried over  $\text{Na}_2\text{SO}_4$  and concentrated under reduced pressure to give the crude amine. And the corresponding trifluoromethanesulfonamides **1d** and **1e** could be synthesized using the same protocol shown above.

**Note-** Compounds **1a**, **1b**, **1f**, **1g** and **1i** are reported in literature<sup>2,3</sup>.

## References:

- Zhang, Y.; Lu, Z.; Desai, A.; Wulff, W. D. *Org. Lett.* 2008, **10**, 5429.
- Chu, L.; Wang, X.-C.; Moore, C. E.; Rheingold, A. L.; Yu, J.-Q. *J. Am. Chem. Soc.* 2013, **135**, 16344.
- Vidal, X.; Mascareñas, J. L.; Gulías, M. *J. Am. Chem. Soc.* 2019, **141**, 1862.

## 2.4 Examples with data.

**Compound 1c** 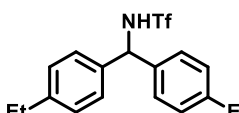 Compound **1c** was obtained as a pale yellow liquid (1.28 g, 3.47 mmol, 83%)  $^1\text{H}$  NMR (400 MHz,  $\text{CDCl}_3$ )  $\delta$  7.24 – 7.02 (m, 8H), 5.81 (s, 1H), 5.41 (brs, 1H) 2.64 (q,  $J = 7.6$  Hz, 4H), 1.22 (t,  $J = 7.6$  Hz, 6H).  $^{13}\text{C}$  NMR (125 MHz,  $\text{CDCl}_3$ )  $\delta$  144.46, 137.18, 128.48, 127.20, 119.57 (q,  $J = 321.25$  Hz), 62.24, 28.55, 15.46. HRMS (APCI-TOF)  $m/z$  calcd. for  $\text{C}_{18}\text{H}_{20}\text{F}_3\text{NO}_2\text{S}$   $[\text{M}]^+$  371.1167; found 371.1166. IR (neat):  $\nu_{\text{max}}/\text{cm}^{-1}$  3300, 2958, 2921, 2852, 1604, 1464, 1370, 1390, 1224, 1182, 1054, 603.

**Compound 1d** 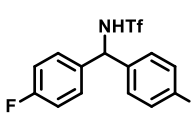 Compound **1d** was obtained as a colorless liquid (1.29 g, 3.66 mmol, 80%)  $^1\text{H}$  NMR (400 MHz,  $\text{CDCl}_3$ )  $\delta$  7.21 (dd,  $J = 7.7, 5.4$  Hz, 4H), 7.10 – 6.93 (m, 4H), 6.09 (brs, 1H), 5.83 (s, 1H).  $^{13}\text{C}$  NMR (100 MHz,  $\text{CDCl}_3$ )  $\delta$  162.61 (d,  $J = 249.47$  Hz), 135.35 (d,  $J = 3.1$  Hz), 128.99 (d,  $J = 8.2$  Hz), 119.46 (q,  $J = 321.26$  Hz), 116.10 (d,  $J = 21.3$  Hz), 61.28. HRMS (APCI-TOF)  $m/z$  calcd. for  $\text{C}_{14}\text{H}_{10}\text{F}_5\text{NO}_2\text{S}$   $[\text{M}]^+$  351.0352; found 351.0345. IR (neat):  $\nu_{\text{max}}/\text{cm}^{-1}$  3298, 2925, 2854, 1895, 1606, 1510, 1375, 1231, 1199, 1047, 834, 616.

**Compound 1h** 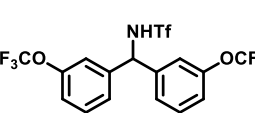 Compound **1h** was obtained as a pale yellow liquid (1.02 g, 2.13 mmol, 75%)  $^1\text{H}$  NMR (400 MHz,  $\text{CDCl}_3$ )  $\delta$  7.42 (t,  $J = 8.0$  Hz, 2H), 7.24 – 7.19 (m, 2H), 7.17 (d,  $J = 7.8$  Hz, 2H), 7.08 (s, 2H), 5.91 (brs, 1H), 5.87 (s, 1H).  $^{13}\text{C}$  NMR (100 MHz,  $\text{CDCl}_3$ )  $\delta$  149.79, 141.11, 130.79, 125.58, 121.18, 120.40 (q,  $J = 321.25$  Hz), 119.39 (q,  $J = 355.25$  Hz), 119.88, 61.27. HRMS (APCI-TOF)  $m/z$  calcd. for  $\text{C}_{16}\text{H}_{10}\text{F}_9\text{NO}_4\text{S}$   $[\text{M}]^+$  483.0187; found 483.0195. IR (neat):  $\nu_{\text{max}}/\text{cm}^{-1}$  3296, 3075, 2927, 1610, 1490, 1453, 1377, 1264, 1145, 610.

**Compound 1j** 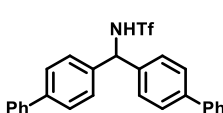 Compound **1j** was obtained as a white solid (1.0 g, 2.15 mmol, 72%)  $^1\text{H}$  NMR (400 MHz,  $\text{CDCl}_3$ )  $\delta$  7.60 (ddd,  $J = 9.4, 7.2, 1.1$  Hz, 8H), 7.44 (dd,  $J = 10.8, 4.5$  Hz, 4H), 7.39 – 7.33 (m, 6H), 5.96 (d,  $J = 8.7$  Hz, 1H), 5.72 (d,  $J = 8.7$  Hz, 1H).  $^{13}\text{C}$  NMR (100 MHz,  $\text{CDCl}_3$ )  $\delta$  141.46, 140.25, 138.55, 128.96, 127.81, 127.73, 127.18, 119.59 (q,  $J = 321.25$  Hz), HRMS (APCI-TOF)  $m/z$  calcd. for  $\text{C}_{26}\text{H}_{20}\text{F}_3\text{NO}_2\text{S}$   $[\text{M}]^+$  467.1167; found 467.1164. IR (neat):  $\nu_{\text{max}}/\text{cm}^{-1}$  3308, 3031, 2925, 1600, 1487, 1374, 1230, 1144, 1039, 1007, 764.

### Compound 1k

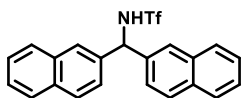

Compound **1k** was obtained as a white solid (996mg, 2.40 mmol, 68%)  $^1\text{H NMR}$  (500 MHz,  $\text{CDCl}_3$ )  $\delta$  7.86 – 7.79 (m, 6H), 7.76 (s, 2H), 7.54 – 7.48 (m, 4H), 7.35 (dd,  $J = 8.6, 1.7$  Hz, 2H), 6.20 (d,  $J = 8.9$  Hz, 1H), 5.83 (d,  $J = 8.7$  Hz, 1H).  $^{13}\text{C NMR}$  (100 MHz,  $\text{CDCl}_3$ )  $\delta$  136.88, 133.22, 133.09, 129.19, 128.28, 127.83, 126.85, 126.45, 124.95, 119.61 (q,  $J = 321.25$  Hz), 62.82. HRMS (APCI-TOF)  $m/z$  calcd. for  $\text{C}_{22}\text{H}_{16}\text{F}_3\text{NO}_2\text{S}$  [ $\text{M}$ ] $^+$  415.0854; found 415.0856. IR (neat):  $\nu_{\text{max}}/\text{cm}^{-1}$  3306, 3058, 2927, 2250, 1601, 1508, 1428, 1374, 1198, 1230, 1198, 1046, 609.

### Compound 1l

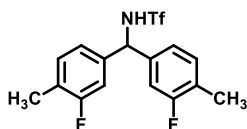

Compound **1l** was obtained as a white solid (1.1 g, 2.96 mmol, 74%)  $^1\text{H NMR}$  (400MHz,  $\text{CDCl}_3$ )  $\delta$  7.02 (dd,  $J = 8.4, 2.4$  Hz, 2H), 6.97 (d,  $J = 2.1$  Hz, 2H), 6.78 (d,  $J = 8.4$  Hz, 2H), 5.71 (d,  $J = 6.4$  Hz, 1H), 5.29 (s, 1H), 3.81 (s, 6H), 2.17 (s, 6H).  $^{13}\text{C NMR}$  (125 MHz,  $\text{CDCl}_3$ )  $\delta$  161.45 (d,  $J = 247.12$  Hz), 138.96 (d,  $J = 6.3$  Hz), 132.16 (d,  $J = 6.3$  Hz), 125.42 (d,  $J = 16.38$  Hz), 122.49, 119.11 (q,  $J = 321.26$  Hz), 113.95 (d,  $J = 21.3$  Hz), 61.28, 14.34. HRMS (APCI-TOF)  $m/z$  calcd. for  $\text{C}_{16}\text{H}_{14}\text{F}_3\text{NO}_2\text{S}$  [ $\text{M}$ ] $^+$  379.0665; found 379.0668. IR (neat):  $\nu_{\text{max}}/\text{cm}^{-1}$  3300, 2957, 2928, 1991, 1627, 1584, 1510, 1454, 1230, 1198, 1052, 969, 633.

### Compound 1m

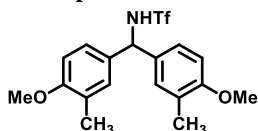

Compound **1m** was obtained as a pale yellow liquid (1.01 g, 2.50 mmol, 34%)  $^1\text{H NMR}$  (400 MHz,  $\text{CDCl}_3$ )  $\delta$  7.01 (dd,  $J = 8.4, 2.2$  Hz, 2H), 6.96 (d,  $J = 1.9$  Hz, 2H), 6.77 (d,  $J = 8.4$  Hz, 2H), 5.70 (s, 1H), 5.32 (s, 1H), 3.81 (s, 6H), 2.17 (s, 6H).  $^{13}\text{C NMR}$  (100 MHz,  $\text{CDCl}_3$ )  $\delta$  157.61, 131.73, 129.46, 127.33, 125.62, 109.93, 61.83, 55.43, 16.41. HRMS (APCI-TOF)  $m/z$  calcd. for  $\text{C}_{18}\text{H}_{19}\text{F}_3\text{NO}_4\text{S}$  [ $\text{M-H}$ ] $^+$  402.0992; found 402.1008. IR (neat):  $\nu_{\text{max}}/\text{cm}^{-1}$  343, 2954, 2854, 2836, 2060, 1609, 1503, 1464, 1375, 1253, 1131, 1035, 620.

### Compound 1n

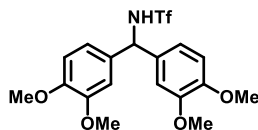

Compound **1n** was obtained as a pale yellow liquid (400mg, 0.924 mmol, 28%)  $^1\text{H NMR}$  (400 MHz,  $\text{CDCl}_3$ )  $\delta$  6.82 (d,  $J = 8.3$  Hz, 2H), 6.78 (d,  $J = 2.0$  Hz, 1H), 6.75 (d,  $J = 1.9$  Hz, 1H), 6.72 (d,  $J = 1.9$  Hz, 2H), 5.76 (d,  $J = 8.6$  Hz, 1H), 5.66 – 5.52 (m, 1H), 3.85 (s, 6H), 3.79 (s, 6H).  $^{13}\text{C NMR}$  (100 MHz,  $\text{CDCl}_3$ )  $\delta$  149.32, 149.04, 132.26, 119.59 (q,  $J = 321.26$  Hz), 119.65, 111.24, 110.49, 62.08, 56.01, 55.98. HRMS (APCI-TOF)  $m/z$  calcd. for  $\text{C}_{18}\text{H}_{21}\text{F}_3\text{NO}_5\text{S}$  [ $\text{M+H}$ ] $^+$  420.1093; found 420.1099. IR (neat):  $\nu_{\text{max}}/\text{cm}^{-1}$  3456, 2957, 294, 2055, 1639, 1516, 1375, 1228, 1191, 1026, 606.

## 3. Experimental procedure and characterization of products

### 3.1 General procedure for Pd(II)-Catalysed Racemic Synthesis of 1,3 disubstituted isoindoline

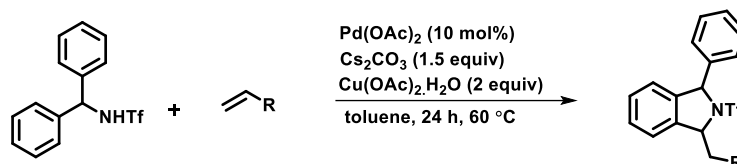

A 5 mL vial was charged with  $\text{Pd}(\text{OAc})_2$  (4.5 mg, 0.20 mmol, 10 mol%),  $\text{Cu}(\text{OAc})_2 \cdot \text{H}_2\text{O}$  (79.6 mg, 0.40 mmol, 2.0 equiv),  $\text{Cs}_2\text{CO}_3$  (97.5 mg, 0.3 mmol, 1.5 equiv), toluene (3.0 mL) and then the reaction mixture was stirred at room temperature for 10 min under a nitrogen atmosphere. Then diarylmethyltriflamide **1a** (0.2 mmol, 1.0 equiv) and activated olefin **2** (0.3 mmol, 1.5 equiv) were added into the solution in sequence. The vial was sealed under nitrogen and heated to 60 °C (using an oil bath) with stirring for 24h. After cooling down, the reaction mixture was diluted with ethyl acetate and concentrated to give the crude compound which was directly purified by column chromatography.

### 3.2 General procedure for Pd(II)-Catalysed Enantioselective Synthesis of 1,3 disubstituted isoindoline

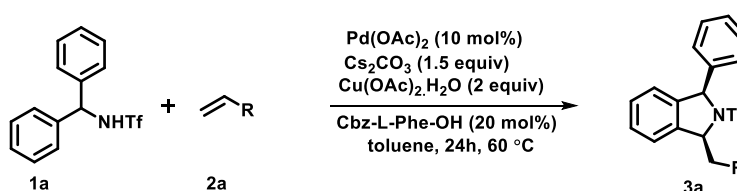

A 5 mL vial was charged with  $\text{Pd}(\text{OAc})_2$  (4.5 mg, 0.020 mmol, 10 mol%),  $\text{Cu}(\text{OAc})_2 \cdot \text{H}_2\text{O}$  (79.6 mg, 0.40 mmol, 2.0 equiv),  $\text{Cs}_2\text{CO}_3$  (97.5 mg, 0.3 mmol, 1.5 equiv.), Cbz-L-Phe-OH (12 mg, 0.04 mmol, 0.20 equiv), toluene (2.0 mL), and then the reaction mixture was stirred at room temperature for 10 min under a nitrogen atmosphere. Then diarylmethyltriflamide **1a** (0.20 mmol, 1.0 equiv) and activated olefin **2** (0.3 mmol, 1.5 equiv) were added into the solution in sequence. The vial was sealed under nitrogen and heated to 60 °C (using an oil bath) with stirring for 24h. After cooling down, the reaction mixture

was diluted with ethyl acetate and concentrated to give the crude compound which was directly purified by column chromatography.

### 3.3 Gram scale reaction for synthesis of (+) enantiomer of 1,3 disubstituted isoindoline

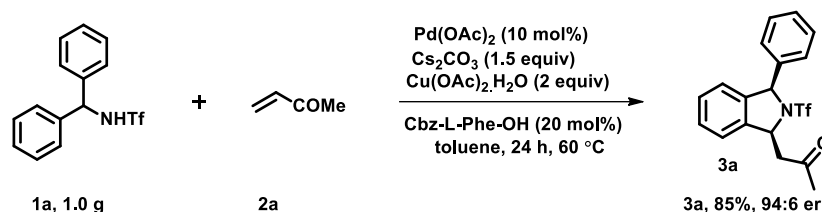

A 50 mL screw-cap vial was charged with  $\text{Pd(OAc)}_2$  (72 mg, 0.32 mmol, 10 mol%),  $\text{Cu(OAc)}_2 \cdot \text{H}_2\text{O}$  (1.27 g, 6.4 mmol, 2.0 equiv),  $\text{Cs}_2\text{CO}_3$  (1.04 g, 4.80 mmol 1.5 equiv),  $\text{Cbz-L-Phe-OH}$  (127mg, 0.4 mmol, 20 mol%), toluene (20 mL) and then the reaction mixture was stirred at room temperature for 30 min under a nitrogen atmosphere. Then diarylmethyltriflamides **1a** (3.2 mmol, 1.0 equiv) and methyl vinyl ketone **2a** (4.8 mmol, 1.5 equiv) were added into the solution in sequence. The vial was sealed under nitrogen and heated to 60 °C (using an oil bath) with stirring for 24h. After cooling down, the reaction mixture was diluted with ethyl acetate and concentrated to give the crude compound which was directly purified by column chromatography to afford desired product **3a** (1.04 g, 2.7 mmol, 85 %). HPLC analysis (Chiralpak IC-3; *n*-Hexane/*i*-PrOH =95/5, 0.9 ml/min, 254 nm):  $t_r$  (major) = 5.2 min,  $t_r$  (minor) = 5.85 min, 94:6 er.

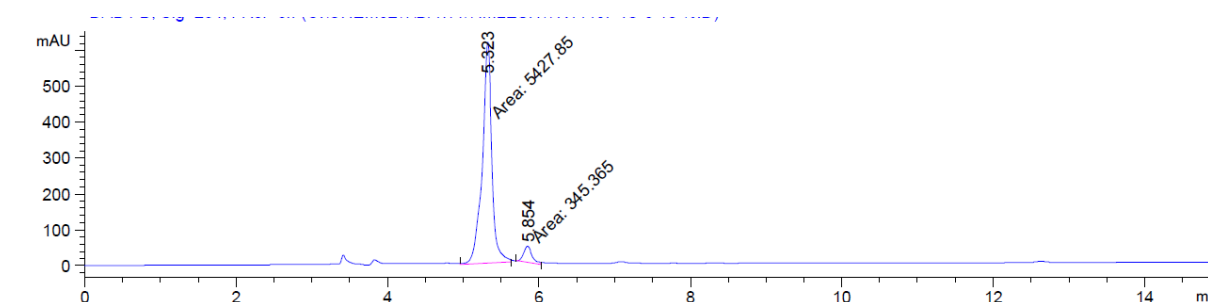

| Peak # | RetTime [min] | Type | Width [min] | Area [mAU*s] | Height [mAU] | Area %  |
|--------|---------------|------|-------------|--------------|--------------|---------|
| 1      | 5.323         | MM   | 0.1467      | 5427.85205   | 616.64771    | 94.0178 |
| 2      | 5.854         | MM   | 0.1297      | 345.36548    | 44.36584     | 5.9822  |

### 3.4 Gram scale synthesis of (-) enantiomer of 1,3 disubstituted isoindoline

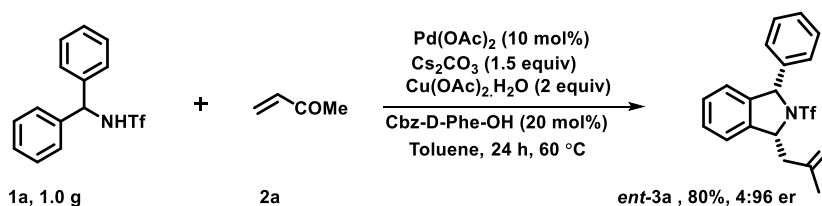

A 50 mL screw-cap vial was charged with  $\text{Pd(OAc)}_2$  (72 mg, 0.32 mmol, 10 mol%),  $\text{Cu(OAc)}_2 \cdot \text{H}_2\text{O}$  (1.27 g, 6.4 mmol, 2.1 equiv),  $\text{Cs}_2\text{CO}_3$  (1.04 g, 4.80 mmol 1.5 equiv),  $\text{Cbz-D-Phe-OH}$  (127mg, 0.4 mmol, 20 mol%), toluene (20 mL) and then the reaction mixture was stirred at room temperature for 30 min under a nitrogen atmosphere. Then diarylmethyltriflamides **1a** (3.2 mmol, 1.0 equiv) and methyl vinyl ketone **2a** (4.8 mmol, 1.5 equiv) were added into the solution in sequence. The vial was sealed under nitrogen and heated to 60 °C (using an oil bath) with stirring for 24h. After cooling down, the reaction

mixture was diluted with ethyl acetate and concentrated to give the crude compound which was directly purified by column chromatography to afford desired product **ent-3a** (980mg, 2.56 mmol, 80%). HPLC analysis (Chiralpak IC-3; *n*-Hexane/*i*-PrOH = 95/5, 0.9 ml/min, 254 nm):  $t_r$  (major) = 7.51 min,  $t_r$  (minor) = 6.36 min, 4:96 er.

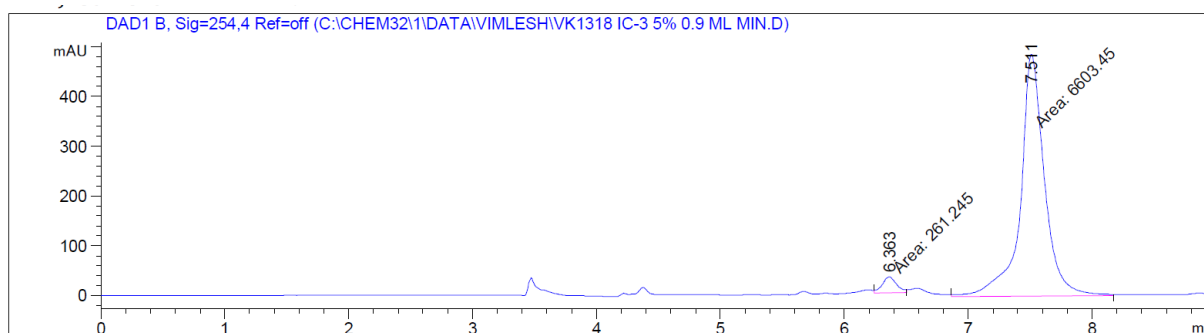

| Peak # | RetTime [min] | Type | Width [min] | Area [mAU*s] | Height [mAU] | Area %  |
|--------|---------------|------|-------------|--------------|--------------|---------|
| 1      | 6.363         | MM   | 0.1357      | 261.24463    | 32.08454     | 3.8056  |
| 2      | 7.511         | MM   | 0.2263      | 6603.45459   | 486.28693    | 96.1944 |

### 3.5 Deuterium labelling experiment.

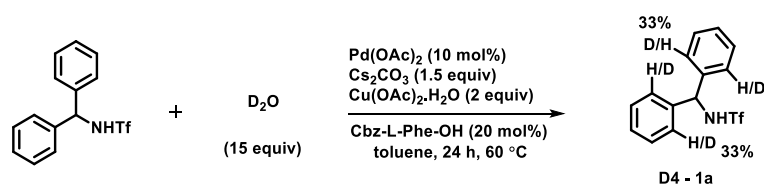

A 10 mL screw-cap vial was charged with Pd(OAc)<sub>2</sub> (4.5 mg, 0.20mmol, 10 mol%), Cu(OAc)<sub>2</sub>·H<sub>2</sub>O (79.6 mg, 0.40 mmol, 2.0 equiv), Cs<sub>2</sub>CO<sub>3</sub> (97.5 mg, 0.3mmol, 1.5 equiv.), Cbz-L-Phe-OH (12mg, 0.04mmol, 0.20 equiv), toluene (2.0 mL) and then the reaction mixture was stirred at room temperature for 10 min under a nitrogen atmosphere. Then diarylmethyltrifluoromethylamides **1a** (0.20 mmol, 1.0 equiv) and D<sub>2</sub>O (3.0 mmol, 15 equiv) were added into the solution in sequence. The vial was sealed under nitrogen atmosphere and heated to 60 °C (using an oil bath) with stirring for 10h. After cooling down, the reaction mixture was diluted with ethyl acetate and concentrated to give the crude compound which was directly purified by column chromatography to afford desired product **D4-1a** in 78% (49 mg, 0.156mmol, 78%).

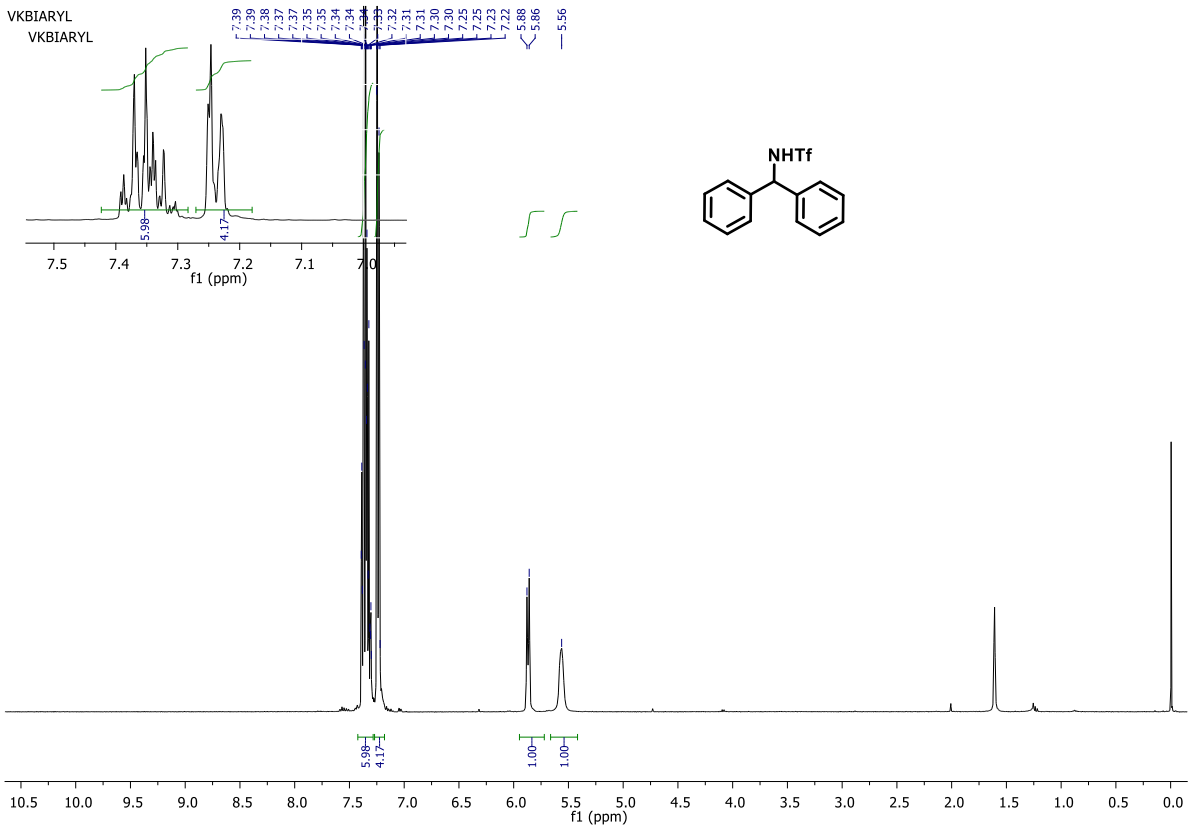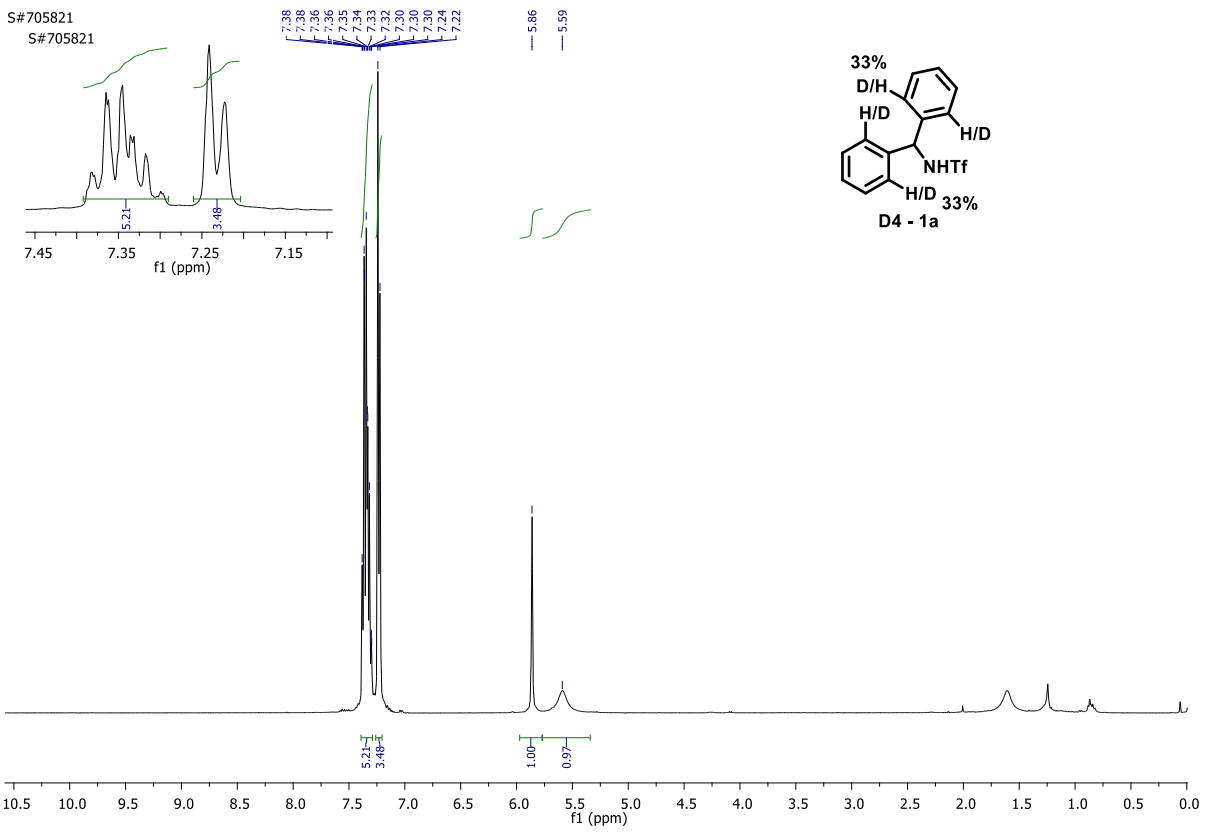

### 3.6 Detection of intermediate D.

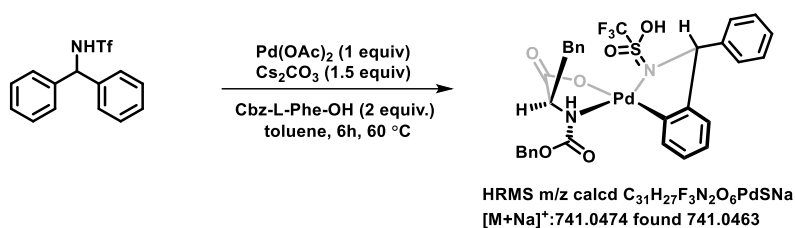

A screw-cap 10 mL vial was charged with  $Pd(OAc)_2$  (45 mg, 0.20 mmol, 1.0 equiv),  $Cs_2CO_3$  (97.5 mg, 0.30 mmol, 1.5 equiv.), Cbz-L-Phe-OH (120 mg, 0.40 mmol, 2.0 equiv), toluene (2.0 mL) and then the reaction mixture was stirred at room temperature for 10 min under a nitrogen atmosphere. Then diarylmethyltriflamide **1a** (0.20 mmol, 1.0 equiv) was added into the solution. The vial was sealed under a nitrogen and heated to 60 °C (using an oil bath) with stirring for 6h. After cooling down, the reaction mixture was filtered through a celite pad and concentrated to give the crude compound which was directly submitted for HRMS.

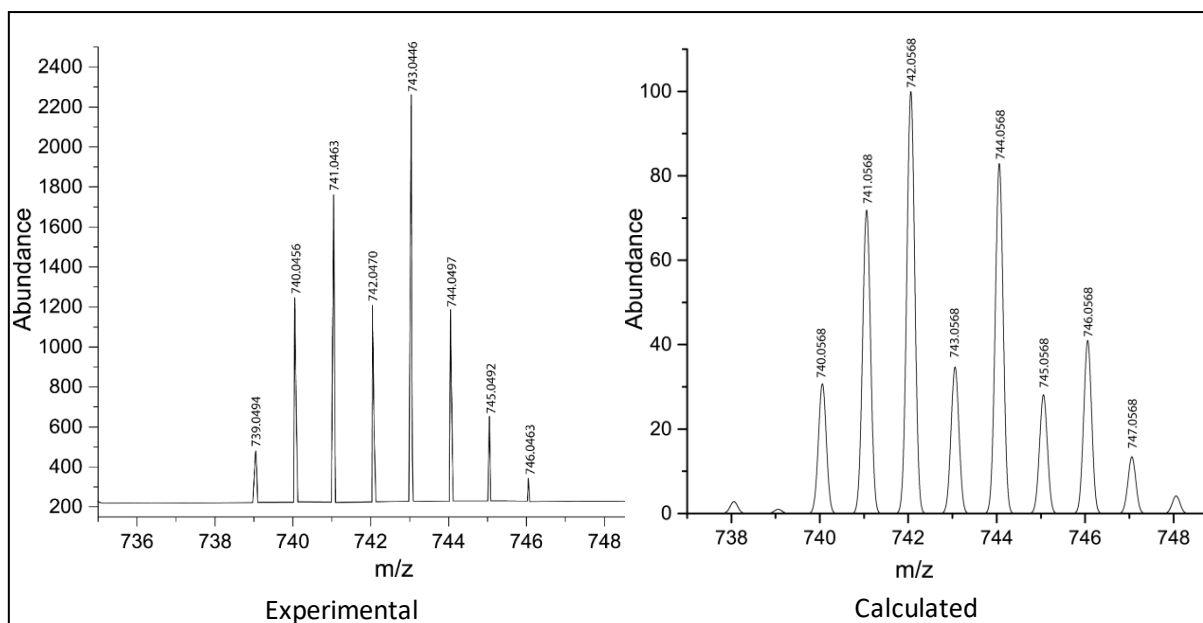

### 3.7 Examples with data

**Compound 3a** Following the general procedure, Compound **3a** was obtained as a white crystalline solid (68.9 mg, 0.18 mmol, 90%) Melting point = 119 °C.  $^1H$  NMR (500 MHz,  $CDCl_3$ )  $\delta$  7.41 – 7.26 (m, 8H), 7.05 (d,  $J$  = 7.1 Hz, 2H), 6.17 (s, 1H), 5.85 (d,  $J$  = 8.8 Hz, 1H), 3.43 (dd,  $J$  = 17.8, 2.1 Hz, 1H), 3.04 (dd,  $J$  = 17.9, 9.7 Hz, 1H), 2.21 (s, 3H).  $^{13}C$  NMR (125 MHz,  $CDCl_3$ )  $\delta$  205.13, 140.67, 138.87, 138.34, 129.11, 129.03, 128.92, 128.74, 127.77, 123.77, 123.43, 70.07, 62.45, 52.89, 30.59. HRMS (APCI-TOF)  $m/z$  calcd. for  $C_{18}H_{17}F_3NO_3S$   $[M+H]^+$  384.0881; found 384.0882. IR (neat):  $\nu_{max}/cm^{-1}$  3035, 2957, 2922, 2851, 1717, 1392, 1364, 1226, 1189, 1056, 599. HPLC analysis (Chiralpak IC-3; *n*-Hexane/*i*-PrOH = 95/5, 0.9 ml/min, 254 nm):  $t_r$  (major) = 6.21 min,  $t_r$  (minor) = 7.02 min, 95:5 er.  $[\alpha]_D^{30} = +15.03$  ( $c = 0.13$  in  $CHCl_3$ ).

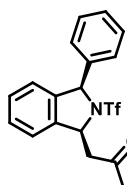

**Compound 3b** Following the general procedure, Compound **3b** was obtained as a colorless liquid (69 mg, 0.17 mmol, 84%)  $^1H$  NMR (500 MHz,  $CDCl_3$ )  $\delta$  7.18 – 7.06 (m, 6H), 6.91 (d,  $J$  = 7.8 Hz, 1H), 6.08 (s, 1H), 5.76 (d,  $J$  = 8.6 Hz, 1H), 3.38 (dd,  $J$  = 17.8, 2.2 Hz, 1H), 3.00 (dd,  $J$  = 17.9, 9.7 Hz, 1H), 2.34 (d,  $J$  = 2.3 Hz, 6H), 2.20 (s, 3H).  $^{13}C$  NMR (126 MHz,  $CDCl_3$ )  $\delta$  205.24, 139.14, 139.09, 138.54, 137.99, 135.65, 129.94, 129.53, 127.74, 123.67, 123.45, 69.70, 62.23, 53.07, 30.59, 21.45, 21.23. HRMS (APCI-TOF)  $m/z$  calcd. for  $C_{20}H_{21}F_3NO_3S$   $[M+H]^+$  412.1194; found 412.1184. IR (neat):  $\nu_{max}/cm^{-1}$  3054, 2956, 2869, 1718, 1616, 1592, 1459, 1392, 1056, 863. HPLC analysis (Chiralpak IC-3; *n*-Hexane/*i*-PrOH = 95/5, 0.9 ml/min, 254 nm):  $t_r$  (major) = 5.67 min,  $t_r$  (minor) = 7.42 min, 92:8 er.  $[\alpha]_D^{30} = +13.33$  ( $c = 0.15$  in  $CHCl_3$ ).

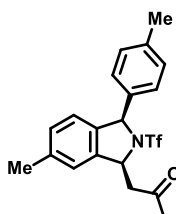

**Compound 3c** Following the general procedure, Compound **3c** was obtained as a colorless liquid (73 mg, 0.17 mmol, 85%) <sup>1</sup>H NMR (500 MHz, CDCl<sub>3</sub>) δ 7.20 – 7.15 (m, 5H), 7.13 (d, *J* = 7.9 Hz, 1H), 6.95 (d, *J* = 7.9 Hz, 1H), 6.09 (s, 1H), 5.78 (d, *J* = 8.8 Hz, 1H), 3.40 (dd, *J* = 17.8, 2.3 Hz, 1H), 3.01 (dd, *J* = 17.8, 9.6 Hz, 1H), 2.67 – 2.62 (m, 4H), 2.21 (s, 3H), 1.22 (td, *J* = 7.6, 5.2 Hz, 6H). <sup>13</sup>C NMR (125 MHz, CDCl<sub>3</sub>) δ 205.28, 145.54, 144.74, 139.07, 138.19, 135.88, 128.79, 128.31, 127.74, 123.54, 122.49, 69.76, 62.30, 53.08, 30.64, 28.84, 28.58, 15.64, 15.38. HRMS (APCI-TOF) *m/z* calcd. for C<sub>22</sub>H<sub>25</sub>F<sub>3</sub>NO<sub>3</sub>S[M+H]<sup>+</sup> 440.1507; found 440.1518. IR (neat):  $\nu_{\max}$ /cm<sup>-1</sup> 3052, 2960, 2854, 1716, 1617, 1590, 1460, 1390, 1060, 897. HPLC analysis (Chiralpak IC-3; *n*-Hexane/*i*-PrOH = 90/10, 0.9 ml/min, 254 nm): *t<sub>r</sub>* (major) = 4.61 min, *t<sub>r</sub>* (minor) = 5.82 min, 93:7 er. [ $\alpha$ ]<sub>D</sub><sup>30</sup> = +10.00 (c = 0.10 in CHCl<sub>3</sub>).

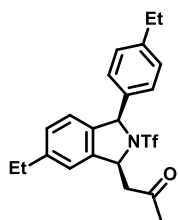

**Compound 3d** Following the general procedure, Compound **3d** was obtained as a yellow liquid (69 mg, 0.16 mmol, 82 %) <sup>1</sup>H NMR (400 MHz, CDCl<sub>3</sub>) δ 7.40 – 7.16 (m, 2H), 7.13 – 7.07 (m, 1H), 7.07 – 6.87 (m, 4H), 6.09 (s, 1H), 5.75 (d, *J* = 9.4 Hz, 1H), 3.39 (dd, *J* = 18.1, 1.9 Hz, 1H), 2.98 (dd, *J* = 18.2, 9.9 Hz, 1H), 2.20 (s, 3H). <sup>13</sup>C NMR (126 MHz, CDCl<sub>3</sub>) δ 204.92, 164.29, 163.91, 162.32, 161.93, 140.96, 136.27, 133.68, 129.79, 129.11, 129.04, 125.29, 125.22, 116.83, 116.65, 116.04, 115.87, 111.04, 110.84, 68.77, 62.09, 52.50, 30.41. HRMS (APCI-TOF) *m/z* calcd. for C<sub>18</sub>H<sub>15</sub>F<sub>5</sub>NO<sub>3</sub>S [M+H]<sup>+</sup> 420.0693; found 420.0686. IR (neat):  $\nu_{\max}$ /cm<sup>-1</sup> 3033, 2924, 2854, 1716, 1605, 1510, 1491, 1392, 1055, 866. HPLC analysis (Chiralpak IC-3; *n*-Hexane/*i*-PrOH = 98/2, 0.9 ml/min, 254 nm): *t<sub>r</sub>* (major) = 8.27 min, *t<sub>r</sub>* (minor) = 7.72 min, 95:5 er. [ $\alpha$ ]<sub>D</sub><sup>30</sup> = +12.00 (c = 0.08 in CHCl<sub>3</sub>).

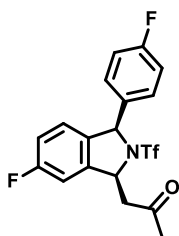

**Compound 3e** Following the general procedure, Compound **3e** was obtained as a colorless liquid (75 mg, 0.17 mmol, 84 %) <sup>1</sup>H NMR (500 MHz, CDCl<sub>3</sub>) δ 7.40 (s, 1H), 7.36 – 7.32 (m, 2H), 7.29 (dd, *J* = 8.2, 1.8 Hz, 1H), 7.21 – 7.15 (m, 2H), 6.95 (d, *J* = 8.1 Hz, 1H), 6.07 (s, 1H), 5.76 (d, *J* = 9.1 Hz, 1H), 3.40 (d, *J* = 17.8 Hz, 1H), 2.98 (dd, *J* = 18.2, 9.9 Hz, 1H), 2.22 (s, 3H). <sup>13</sup>C NMR (125 MHz, CDCl<sub>3</sub>) δ 204.89, 140.71, 138.63, 137.73, 135.48, 135.06, 134.76, 129.64, 129.42, 129.27, 128.62, 124.88, 124.02, 68.84, 62.03, 61.28, 52.52, 30.44. HRMS (APCI-TOF) *m/z* calcd. for C<sub>18</sub>H<sub>15</sub>Cl<sub>2</sub>F<sub>3</sub>NO<sub>3</sub>S [M+H]<sup>+</sup> 452.0102; found 452.0108. IR (neat):  $\nu_{\max}$ /cm<sup>-1</sup> 2957, 2926, 2854, 1716, 1604, 1492, 1393, 1227, 1154, 1055, 862. HPLC analysis (Chiralpak IC-3; *n*-Hexane/*i*-PrOH = 99/1, 0.5 ml/min, 254 nm): *t<sub>r</sub>* (major) = 15.57 min, *t<sub>r</sub>* (minor) = 17.33 min, 95:5 er. [ $\alpha$ ]<sub>D</sub><sup>30</sup> = +4.0 (c = 0.25 in CHCl<sub>3</sub>).

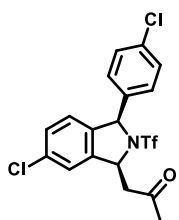

**Compound 3f** Following the general procedure, Compound **3f** was obtained as a colorless liquid (78 mg, 0.18 mmol, 88 %) <sup>1</sup>H NMR (400 MHz, CDCl<sub>3</sub>) δ 7.15 (dd, *J* = 9.1, 2.4 Hz, 2H), 6.97 – 6.79 (m, 5H), 6.05 (s, 1H), 5.74 (t, *J* = 13.4 Hz, 1H), 3.79 (s, 3H), 3.78 (s, 3H), 3.35 (dd, *J* = 18.0, 2.7 Hz, 1H), 2.97 (dd, *J* = 18.0, 9.7 Hz, 1H), 2.19 (s, 3H). <sup>13</sup>C NMR (125 MHz, CDCl<sub>3</sub>) δ 205.31, 160.49, 159.84, 140.48, 132.30, 130.44, 129.30, 124.63, 115.99, 114.14, 107.72, 69.22, 62.18, 55.62, 55.37, 53.03, 30.57. HRMS (APCI-TOF) *m/z* calcd. for C<sub>20</sub>H<sub>21</sub>F<sub>3</sub>NO<sub>3</sub>S [M+H]<sup>+</sup> 444.1093; found 444.1091. IR (neat):  $\nu_{\max}$ /cm<sup>-1</sup> 3006, 2950, 2848, 1717, 1616, 1575, 1492, 1392, 1230, 872. HPLC analysis (Chiralpak IC; *n*-Hexane/*i*-PrOH = 90/10, 0.9 ml/min, 254 nm): *t<sub>r</sub>* (major) = 6.34 min, *t<sub>r</sub>* (minor) = 7.54 min, 94:6 er. [ $\alpha$ ]<sub>D</sub><sup>30</sup> = +13.33 (c = 0.15 in CHCl<sub>3</sub>).

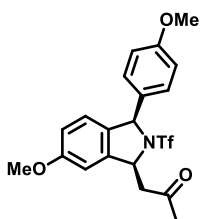

**Compound 3g** Following the general procedure, Compound **3g** was obtained as a pale yellow liquid (68 mg, 0.16 mmol, 83 %) <sup>1</sup>H NMR (400 MHz, CDCl<sub>3</sub>) δ 7.23 (dt, *J* = 7.9, 4.4 Hz, 2H), 7.14 – 7.09 (m, 3H), 7.00 (d, *J* = 7.6 Hz, 1H), 6.81 (s, 1H), 6.04 (s, 1H), 5.77 (d, *J* = 9.0 Hz, 1H), 3.42 (dd, *J* = 17.7, 2.3 Hz, 1H), 2.99 (dd, *J* = 17.8, 9.8 Hz, 1H), 2.35 (s, 3H), 2.28 (s, 3H), 2.20 (s, 3H). <sup>13</sup>C NMR (100 MHz, CDCl<sub>3</sub>) δ 205.26, 140.76, 139.07, 138.58, 135.92, 129.99, 129.44, 128.76, 128.49, 124.65, 124.60, 124.04, 123.12, 70.09, 62.30, 53.08, 30.65, 21.58, 21.32. HRMS (APCI-TOF) *m/z* calcd. for C<sub>20</sub>H<sub>20</sub>F<sub>3</sub>NO<sub>3</sub>SNa [M+Na]<sup>+</sup> 434.1014; found 434.1020. IR (neat):  $\nu_{\max}$ /cm<sup>-1</sup> 2956, 2923, 2868, 1716, 1608, 1496, 1392, 1226, 1057, 882. HPLC analysis (Chiralpak IC-3; *n*-Hexane/*i*-PrOH = 95/5, 0.9 ml/min, 254 nm): *t<sub>r</sub>* (major) = 5.96 min, *t<sub>r</sub>* (minor) = 6.63 min, 87:13 er. [ $\alpha$ ]<sub>D</sub><sup>30</sup> = +20.0 (c = 0.10 in CHCl<sub>3</sub>).

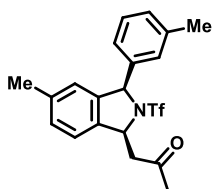

**Compound 3h** Following the general procedure, Compound **3h** was obtained as a colorless liquid (82 mg, 0.15 mmol, 75 %) <sup>1</sup>H NMR (500 MHz, CDCl<sub>3</sub>) δ 7.49 – 7.39 (m, 2H), 7.25 – 7.17 (m, 3H), 7.07 (s, 1H), 6.89 (s, 1H), 6.15 (s, 1H), 5.80 (d, *J* = 9.6 Hz, 1H), 3.42 (d, *J* = 18.5 Hz, 1H), 2.97 (dd, *J* = 18.1, 10.0 Hz, 1H), 2.21 (s, 3H). <sup>13</sup>C NMR (125 MHz, CDCl<sub>3</sub>) δ 204.85, 149.93, 149.68, 141.99, 141.96, 139.50, 137.49, 137.44, 132.36, 130.64, 126.19, 125.46, 122.40, 121.52, 120.26, 119.30, 117.37, 116.34, 68.87, 62.06, 52.67. HRMS (APCI-TOF) *m/z* calcd. for C<sub>20</sub>H<sub>15</sub>F<sub>9</sub>NO<sub>3</sub>S [M+H]<sup>+</sup> 552.0527; found 552.0526. IR (neat):  $\nu_{\max}$ /cm<sup>-1</sup> 2955, 2924, 2869, 2852, 1737, 1600, 1491, 1461, 1377, 1191, 832. HPLC analysis (Chiralpak OD-H; *n*-Hexane/*i*-PrOH = 99/1, 0.5 ml/min, 254 nm): *t<sub>r</sub>* (major) = 8.86 min, *t<sub>r</sub>* (minor) = 9.28 min, 95:5 er. [ $\alpha$ ]<sub>D</sub><sup>30</sup> = +62.50 (c = 0.016 in CHCl<sub>3</sub>).

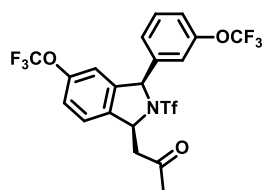

**Compound 3i**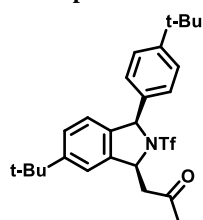

min, 95:5 er.  $[\alpha]_D^{30} = +13.33$  (c = 0.075 in  $\text{CHCl}_3$ ).

Following the general procedure, Compound **3i** was obtained as a colorless liquid (84 mg, 0.17 mmol, 85 %)  $^1\text{H NMR}$  (500 MHz,  $\text{CDCl}_3$ )  $\delta$  7.38 – 7.34 (m, 2H), 7.34 – 7.30 (m, 2H), 7.19 (d,  $J = 8.4$  Hz, 2H), 6.98 (d,  $J = 8.3$  Hz, 1H), 6.10 (s, 1H), 5.79 (d,  $J = 8.8$  Hz, 1H), 3.41 (d,  $J = 17.7$  Hz, 1H), 3.01 (dd,  $J = 17.6, 9.5$  Hz, 1H), 2.21 (s, 3H), 1.30 (s, 9H), 1.29 (s, 9H).  $^{13}\text{C NMR}$  (126 MHz,  $\text{CDCl}_3$ )  $\delta$  205.36, 152.52, 151.52, 138.74, 135.59, 127.29, 126.31, 125.74, 123.19, 119.85, 69.69, 62.51, 53.20, 34.97, 34.67, 31.44, 31.36, 30.75. HRMS (APCI-TOF)  $m/z$  calcd. for  $\text{C}_{26}\text{H}_{33}\text{F}_3\text{NO}_3\text{S}$   $[\text{M}+\text{H}]^+$  496.2133; found 496.2129. IR (neat):  $\nu_{\text{max}}/\text{cm}^{-1}$  2964, 2906, 2870, 1719, 1615, 1498, 1406, 1193, 1054, 869, 616. HPLC analysis (Chiralpak IC; *n*-Hexane/*i*-PrOH = 95/5, 0.9 ml/min, 254 nm):  $t_r$  (major) = 4.27 min,  $t_r$  (minor) = 6.37

**Compound 3j**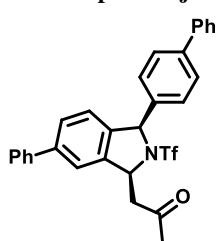

Following the general procedure, Compound **3j** was obtained as a colorless liquid (86.6 mg, 0.16 mmol, 81 %)  $^1\text{H NMR}$  (500 MHz,  $\text{CDCl}_3$ )  $\delta$  7.65 – 7.60 (m, 4H), 7.60 – 7.56 (m, 4H), 7.46 (t,  $J = 7.6$  Hz, 4H), 7.42 – 7.35 (m, 4H), 7.16 (t,  $J = 11.2$  Hz, 1H), 6.26 (s, 1H), 5.94 (d,  $J = 9.0$  Hz, 1H), 3.52 (d,  $J = 18.6$  Hz, 1H), 3.14 (dd,  $J = 18.0, 9.7$  Hz, 1H), 2.24 (s, 3H).  $^{13}\text{C NMR}$  (126 MHz,  $\text{CDCl}_3$ )  $\delta$  205.23, 142.61, 141.74, 140.43, 140.17, 139.75, 139.61, 137.28, 129.04, 128.95, 128.24, 127.96, 127.71, 127.32, 127.22, 124.14, 122.09, 69.66, 62.44, 53.12, 30.61. HRMS (ESI-MS)  $m/z$  calcd. for  $\text{C}_{30}\text{H}_{24}\text{F}_3\text{NNaO}_3\text{S}$   $[\text{M}+\text{Na}]^+$  558.1327; found 558.1312. IR (neat):  $\nu_{\text{max}}/\text{cm}^{-1}$  3441, 3032, 2924, 2857, 1716, 1642, 1483, 1391, 1155, 1057, 762. HPLC analysis (Chiralpak IC-3; *n*-Hexane/*i*-PrOH = 98/2, 0.9 ml/min, 254 nm):  $t_r$  (major) = 10.97 min,  $t_r$  (minor) = 17.52 min, 95:5 er.  $[\alpha]_D^{30} = +9.20$  (c = 0.108 in  $\text{CHCl}_3$ ).

**Compound 3k**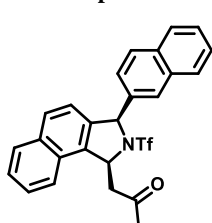

$\text{CHCl}_3$ ).

Following the general procedure, Compound **3k** was obtained as a pale yellow liquid (80 mg, 0.16 mmol, 83 %)  $^1\text{H NMR}$  (400 MHz,  $\text{CDCl}_3$ )  $\delta$  7.91 (s, 1H), 7.90 – 7.78 (m, 5H), 7.73 (d,  $J = 7.9$  Hz, 1H), 7.56 (s, 1H), 7.55 – 7.42 (m, 4H), 7.38 (d,  $J = 8.5$  Hz, 1H), 6.49 (s, 1H), 6.04 (d,  $J = 9.2$  Hz, 1H), 3.50 (dd,  $J = 18.0, 2.6$  Hz, 1H), 3.16 (dd,  $J = 18.0, 9.9$  Hz, 1H), 2.23 (s, 3H).  $^{13}\text{C NMR}$  (100 MHz,  $\text{CDCl}_3$ )  $\delta$  205.31, 138.12, 137.56, 136.84, 133.71, 133.50, 133.32, 133.15, 129.12, 128.42, 128.36, 128.06, 127.84, 127.50, 126.82, 126.75, 125.01, 123.13, 122.77, 69.66, 61.97, 53.19, 30.64. HRMS (APCI-TOF)  $m/z$  calcd. for  $\text{C}_{26}\text{H}_{21}\text{F}_3\text{NO}_3\text{S}$   $[\text{M}+\text{H}]^+$  484.1194; found 484.1189. IR (neat):  $\nu_{\text{max}}/\text{cm}^{-1}$  2955, 2924, 2869, 2853, 1716, 1602, 1493, 1461, 1392, 1222 1159, 967, 859. HPLC analysis (Chiralpak IC-3; *n*-Hexane/*i*-PrOH = 98/2, 0.5 ml/min, 254 nm):  $t_r$  (major) = 21.21 min,  $t_r$  (minor) = 24.57 min, 92:8 er.  $[\alpha]_D^{30} = +12.04$  (c = 0.083 in

**Compound 3l**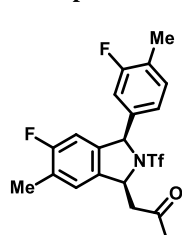

(major) = 9.78 min,  $t_r$  (minor) = 11.42 min, 90:10 er.  $[\alpha]_D^{30} = -15.10$  (c = 0.066 in  $\text{CHCl}_3$ ).

Following the general procedure, Compound **3l** was obtained as a pale yellow liquid (70 mg, 0.15 mmol, 78 %)  $^1\text{H NMR}$  (400 MHz,  $\text{CDCl}_3$ )  $\delta$  7.16 (q,  $J = 7.4$  Hz, 2H), 7.00 (dd,  $J = 7.8, 1.4$  Hz, 1H), 6.91 (d,  $J = 10.4$  Hz, 1H), 6.70 (d,  $J = 7.7$  Hz, 1H), 6.07 (s, 1H), 5.95 (t,  $J = 5.0$  Hz, 1H), 3.22 (dd,  $J = 16.8, 4.3$  Hz, 1H), 3.11 (dd,  $J = 16.8, 5.9$  Hz, 1H), 2.27 (d,  $J = 1.8$  Hz, 1H), 2.25 (d,  $J = 1.6$  Hz, 1H), 2.21 (s, 3H).  $^{13}\text{C NMR}$  (100 MHz,  $\text{CDCl}_3$ )  $\delta$  203.00, 162.58, 160.11, 156.70, 154.21, 144.34, 139.82, 139.75, 138.26, 132.94, 132.90, 131.87, 131.82, 125.85, 125.68, 125.50, 125.15, 123.49, 123.46, 123.15, 119.06, 119.02, 114.66, 114.42, 110.28, 110.03, 69.73, 60.73, 50.76, 30.42, 14.44, 14.21. HRMS (ESI-MS)  $m/z$  calcd. for  $\text{C}_{20}\text{H}_{17}\text{NO}_3\text{F}_5\text{S}$   $[\text{M}-\text{H}]^-$  446.0855; found 446.0875. IR (neat):  $\nu_{\text{max}}/\text{cm}^{-1}$  2956, 2923, 2851, 1719, 1493, 1394, 1226, 1191, 1066, 646. HPLC analysis (Chiralpak IC-3; *n*-Hexane/*i*-PrOH = 97/3, 0.5 ml/min, 254 nm):  $t_r$

**Compound 3m**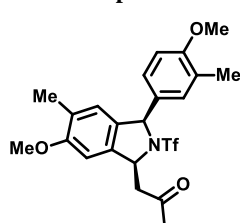

Following the general procedure, Compound **3m** was obtained as a colorless liquid (78 mg, 0.16 mmol, 83%)  $^1\text{H NMR}$  (500 MHz,  $\text{CDCl}_3$ )  $\delta$  7.02 (dd,  $J = 8.3, 2.1$  Hz, 1H), 6.98 (s, 1H), 6.77 (dd,  $J = 14.4, 6.0$  Hz, 3H), 5.98 (s, 1H), 5.70 (brs, 1H), 3.81 (s, 3H), 3.81 (s, 3H), 3.40 (d,  $J = 18.0$  Hz, 1H), 2.99 (dd,  $J = 18.0, 9.8$  Hz, 1H), 2.20 (s, 3H), 2.18 (s, 3H), 2.12 (s, 3H).  $^{13}\text{C NMR}$  (100 MHz,  $\text{CDCl}_3$ )  $\delta$  205.81, 158.55, 157.95, 137.44, 130.17, 129.86, 128.27, 127.05, 126.63, 125.20, 109.74, 104.19, 69.62, 62.32, 55.57, 55.39, 53.39, 30.65, 16.56, 16.51. HRMS (ESI-MS)  $m/z$  calcd. for  $\text{C}_{22}\text{H}_{24}\text{F}_3\text{NO}_5\text{SNa}$   $[\text{M}+\text{Na}]^+$  494.1225; found 494.1237. IR (neat):  $\nu_{\text{max}}/\text{cm}^{-1}$  3423, 2955, 2922, 2850, 1717, 1610, 1503, 1465, 1390, 1205, 1187, 1034, 607. HPLC analysis (Chiralpak IC-3; *n*-Hexane/*i*-PrOH = 98/2, 0.5 ml/min, 254 nm):  $t_r$  (major) = 13.84 min,  $t_r$  (minor) = 20.33 min, 93:7 er.  $[\alpha]_D^{30} = +30.30$  (c = 0.033 in  $\text{CHCl}_3$ ).



**Compound 3n**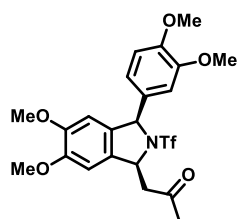

Following the general procedure, Compound **3n** was obtained as a colorless liquid (80 mg, 0.16 mmol, 80 %)  $^1\text{H NMR}$  (400 MHz,  $\text{CDCl}_3$ )  $\delta$  6.91 – 6.82 (m, 2H), 6.80 (d,  $J = 8.4$  Hz, 1H), 6.67 (dd,  $J = 8.3$ , 1.4 Hz, 1H), 6.46 (s, 1H), 6.02 (s, 1H), 5.65 (d,  $J = 8.9$  Hz, 1H), 3.86 (s, 6H), 3.84 (s, 3H), 3.76 (s, 3H), 3.33 (dd,  $J = 17.9$ , 2.7 Hz, 1H), 2.92 (dd,  $J = 17.9$ , 9.7 Hz, 1H), 2.17 (s, 3H).  $^{13}\text{C NMR}$  (126 MHz,  $\text{CDCl}_3$ )  $\delta$  205.72, 150.20, 149.50, 149.20, 133.17, 129.88, 120.52, 111.86, 111.11, 105.87, 105.82, 69.93, 62.44, 56.22, 56.14, 56.02, 53.53, 53.15, 30.66. HRMS (APCI-TOF)  $m/z$  calcd. for  $\text{C}_{22}\text{H}_{24}\text{F}_3\text{NO}_7\text{SNa}$   $[\text{M}+\text{Na}]^+$  526.1123; found 526.1119. IR (neat):  $\nu_{\text{max}}/\text{cm}^{-1}$  2956, 2923, 2851, 1715, 1465, 1389, 1224, 1190, 1026, 611. HPLC analysis (Chiralpak ID; *n*-Hexane/*i*-PrOH = 95/5, 0.9 ml/min, 254 nm):  $t_r$  (major) = 30.66 min,  $t_r$  (minor) = 32.99 min, 87:13 er.  $[\alpha]_{\text{D}}^{30} = +15.10$  ( $c = 0.066$  in  $\text{CHCl}_3$ ).

**Compound 4b**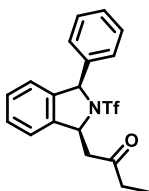

Following the general procedure, Compound **4b** was obtained as a colorless liquid (67.5 mg, 0.17 mmol, 85 %)  $^1\text{H NMR}$  (500 MHz,  $\text{CDCl}_3$ )  $\delta$  7.39 – 7.27 (m, 8H), 7.05 (d,  $J = 7.1$  Hz, 1H), 6.17 (s, 1H), 5.87 (d,  $J = 8.7$  Hz, 1H), 3.39 (dd,  $J = 17.5$ , 2.7 Hz, 1H), 3.00 (dd,  $J = 17.5$ , 9.6 Hz, 1H), 2.52 (dq,  $J = 17.7$ , 7.3 Hz, 1H), 2.40 (dq,  $J = 17.7$ , 7.3 Hz, 1H), 1.10 (t,  $J = 7.3$  Hz, 3H).  $^{13}\text{C NMR}$  (125 MHz,  $\text{CDCl}_3$ )  $\delta$  207.90, 140.68, 138.92, 138.31, 129.06, 128.97, 128.88, 128.70, 127.75, 123.74, 123.37, 70.05, 62.60, 51.64, 36.63, 7.59. HRMS (ESI-MS)  $m/z$  calcd. for  $\text{C}_{19}\text{H}_{17}\text{NO}_3\text{F}_3\text{S}$   $[\text{M}-\text{H}]^-$  396.0887; found 396.0912. IR (neat):  $\nu_{\text{max}}/\text{cm}^{-1}$  3036, 2980, 2941, 2856, 1715, 1602, 1496, 1460, 1392, 1153, 1051, 912. HPLC analysis (Chiralpak IC-3; *n*-Hexane/*i*-PrOH = 98/2, 0.9 ml/min, 254 nm):  $t_r$  (major) = 6.76 min,  $t_r$  (minor) = 7.42 min, 93:7 er.  $[\alpha]_{\text{D}}^{30} = +4.0$  ( $c = 0.25$  in  $\text{CHCl}_3$ ).

**Compound 4c**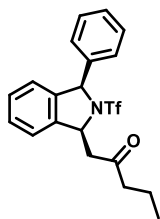

Following the general procedure, Compound **4c** was obtained as a colorless liquid (69 mg, 0.16 mmol, 84 %)  $^1\text{H NMR}$  (400 MHz,  $\text{CDCl}_3$ )  $\delta$  7.41 – 7.27 (m, 6H), 7.27 – 7.24 (m, 2H), 7.03 (d,  $J = 6.9$  Hz, 1H), 6.14 (s, 1H), 5.85 (d,  $J = 8.9$  Hz, 1H), 3.37 (dd,  $J = 17.7$ , 2.6 Hz, 1H), 2.97 (dd,  $J = 17.7$ , 9.8 Hz, 1H), 2.46 (dt,  $J = 16.4$ , 7.4 Hz, 1H), 2.41 – 2.30 (m, 1H), 1.69 – 1.57 (m, 2H), 1.54 (s, 3H), 0.92 (t,  $J = 7.4$  Hz, 3H).  $^{13}\text{C NMR}$  (126 MHz,  $\text{CDCl}_3$ )  $\delta$  207.56, 140.73, 139.01, 138.35, 129.08, 128.97, 128.91, 128.72, 127.77, 123.75, 123.44, 70.05, 62.53, 52.06, 45.34, 17.19, 13.73. HRMS (APCI-TOF)  $m/z$  calcd. for  $\text{C}_{20}\text{H}_{21}\text{F}_3\text{NO}_3\text{S}$   $[\text{M}+\text{H}]^+$  412.1194; found 412.1197. IR (neat):  $\nu_{\text{max}}/\text{cm}^{-1}$  2961 2925, 2855, 1714, 1575, 1483, 1460, 1392, 1186, 1054, 897. HPLC analysis (Chiralpak IC-3; *n*-Hexane/*i*-PrOH = 98/2, 0.9 ml/min, 254 nm):  $t_r$  (major) = 6.08 min,  $t_r$  (minor) = 6.37 min, 98:2 er.  $[\alpha]_{\text{D}}^{30} = +16.60$  ( $c = 0.183$  in  $\text{CHCl}_3$ ).

**Compound 4d**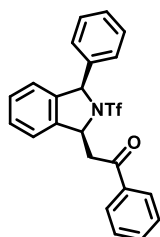

Following the general procedure, Compound **4d** was obtained as a yellow liquid (66.7 mg, 0.15 mmol, 75 %)  $^1\text{H NMR}$  (500 MHz,  $\text{CDCl}_3$ )  $\delta$  7.99 – 7.89 (m, 2H), 7.61 – 7.54 (m, 1H), 7.47 (t,  $J = 7.8$  Hz, 2H), 7.44 – 7.35 (m, 4H), 7.31 (ddd,  $J = 7.1$ , 4.2, 1.9 Hz, 4H), 7.06 (d,  $J = 4.4$  Hz, 1H), 6.21 (s, 1H), 6.06 (d,  $J = 8.8$  Hz, 1H), 3.94 (dd,  $J = 17.3$ , 2.6 Hz, 1H), 3.53 (dd,  $J = 17.3$ , 10.0 Hz, 1H).  $^{13}\text{C NMR}$  (125 MHz,  $\text{CDCl}_3$ )  $\delta$  196.78, 140.72, 138.95, 138.37, 136.40, 133.82, 129.07, 128.97, 128.91, 128.82, 128.27, 127.99, 127.32, 123.83, 123.79, 70.07, 63.16, 48.37. HRMS (APCI-TOF)  $m/z$  calcd. for  $\text{C}_{23}\text{H}_{19}\text{F}_3\text{NO}_3\text{S}$   $[\text{M}+\text{H}]^+$  446.1038; found 446.1078. IR (neat):  $\nu_{\text{max}}/\text{cm}^{-1}$  3437, 2955, 2924, 2855, 1682, 1636, 1460, 1392, 1225, 1118, 1060, 733. HPLC analysis (Chiralpak AD-H; *n*-Hexane/*i*-PrOH = 99/1, 0.5 ml/min, 254 nm):  $t_r$  (major) = 15.40 min,  $t_r$  (minor) = 13.55 min, 90:10 er.  $[\alpha]_{\text{D}}^{30} = +30.00$  ( $c = 0.033$  in  $\text{CHCl}_3$ ).

**Compound 4e**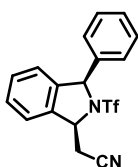

Following the general procedure, Compound **4e** was obtained as a pale yellow liquid (43.9 mg, 0.12 mmol, 60 %)  $^1\text{H NMR}$  (500 MHz,  $\text{CDCl}_3$ )  $\delta$  7.55 (s, 1H), 7.47 (t,  $J = 7.5$  Hz, 1H), 7.41 (t,  $J = 7.6$  Hz, 1H), 7.35 (t,  $J = 6.2$  Hz, 5H), 7.05 (d,  $J = 4.8$  Hz, 1H), 6.21 (s, 1H), 5.52 (s, 1H), 3.24 (d,  $J = 14.3$  Hz, 1H), 3.02 (s, 1H).  $^{13}\text{C NMR}$  (100 MHz,  $\text{CDCl}_3$ )  $\delta$  138.86, 135.07, 130.17, 129.49, 129.26, 128.94, 128.78, 124.34, 122.77, 116.03, 70.73, 62.36, 26.39.  $^{13}\text{C NMR}$  (100 MHz,  $\text{CDCl}_3$ )  $\delta$  139.25, 138.89, 135.07, 130.17, 129.51, 129.26, 128.95, 124.34, 122.79, 116.25, 70.83, 62.48, 26.14. HRMS (APCI-TOF)  $m/z$  calcd. for  $\text{C}_{17}\text{H}_{14}\text{F}_3\text{N}_2\text{O}_2\text{S}$   $[\text{M}+\text{H}]^+$  367.0728; found 367.0735. IR (neat):  $\nu_{\text{max}}/\text{cm}^{-1}$  3037, 2955, 2923, 2851, 2253, 1960, 1461, 1392, 1226, 1194, 1056, 612. HPLC analysis (Chiralpak IC-3; *n*-Hexane/*i*-PrOH = 90/10, 0.9 ml/min, 254 nm):  $t_r$  (major) = 14.74 min,  $t_r$  (minor) = 6.86 min, 90:10 er.  $[\alpha]_{\text{D}}^{30} = +7.51$  ( $c = 0.133$  in  $\text{CHCl}_3$ ).

**Compound 4f**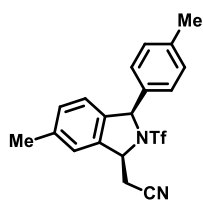

Following the general procedure, Compound **4f** was obtained as a pale yellow liquid (52.2 mg, 0.14 mmol, 65 %)  $^1\text{H NMR}$  (400 MHz,  $\text{CDCl}_3$ )  $\delta$  7.34 (s, 1H), 7.22 (t,  $J = 7.2$  Hz, 3H), 7.16 (d,  $J = 7.9$  Hz, 2H), 6.93 (d,  $J = 7.2$  Hz, 1H), 6.15 (s, 1H), 5.45 (s, 1H), 3.21 (dd,  $J = 16.8$ , 2.5 Hz, 1H), 2.99 (dd,  $J = 16.6$ , 7.3 Hz, 1H), 2.43 (s, 3H), 2.34 (s, 3H).  $^{13}\text{C NMR}$  (100 MHz,  $\text{CDCl}_3$ )  $\delta$  139.66, 139.12, 136.56, 136.13, 135.32, 131.11, 129.56, 128.65, 124.02, 123.06, 116.23, 70.46, 62.27, 26.34, 21.51, 21.26. HRMS (ESI-MS)  $m/z$  calcd. for  $\text{C}_{19}\text{H}_{17}\text{F}_3\text{N}_2\text{O}_2\text{SNa}$   $[\text{M}+\text{Na}]^+$  417.0861; found 417.0851. IR (neat):  $\nu_{\text{max}}/\text{cm}^{-1}$  3030, 2925, 2854, 2253, 1914, 1515, 1458, 1392, 1225, 1194, 1044, 823, 643. HPLC analysis (Chiralpak AD-H; *n*-Hexane/*i*-PrOH = 95/5, 0.9 ml/min, 254 nm):  $t_r$  (major) = 6.44 min,  $t_r$  (minor) = 7.46 min, 91:9 er.  $[\alpha]_{\text{D}}^{30} = +3.0$  ( $c = 0.33$  in  $\text{CHCl}_3$ ).

**Compound 4g**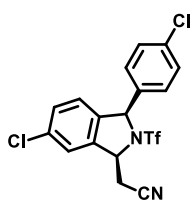

Following the general procedure, Compound **4g** was obtained as colorless liquid (47.9 mg, 0.11 mmol, 56 %) <sup>1</sup>H NMR (400 MHz, CDCl<sub>3</sub>) δ 7.47 (s, 1H), 7.40 (dd, *J* = 8.3, 1.6 Hz, 1H), 7.37 – 7.25 (m, 4H), 6.95 (d, *J* = 7.9 Hz, 1H), 6.14 (s, 1H), 5.48 (s, 1H), 3.18 (dd, *J* = 17.1, 3.2 Hz, 1H), 3.08 (dd, *J* = 17.1, 6.4 Hz, 1H). <sup>13</sup>C NMR (125 MHz, CDCl<sub>3</sub>) δ 136.94, 136.65, 135.96, 135.68, 130.85, 130.39, 129.27, 125.55, 122.99, 115.68, 69.70, 62.13, 25.88. HRMS (ESI-MS) *m/z* calcd. for C<sub>19</sub>H<sub>17</sub>F<sub>3</sub>N<sub>2</sub>O<sub>2</sub>SNa [M+Na]<sup>+</sup> 456.9768; found 456.9777. IR (neat):  $\nu_{\max}/\text{cm}^{-1}$  3037, 2926, 2855, 2253, 1915, 1493, 1393, 1226, 1212, 1149, 1088, 626. HPLC analysis (Chiralpak AD-H; *n*-Hexane/*i*-PrOH = 95/5, 0.5 ml/min, 254 nm): *t<sub>r</sub>*(major) = 22.60 min, *t<sub>r</sub>*(minor) = 20.89 min, 94:6 er. [ $\alpha$ ]<sub>D</sub><sup>30</sup> = +10.0 (*c* = 0.10 in CHCl<sub>3</sub>).

**Compound 4h**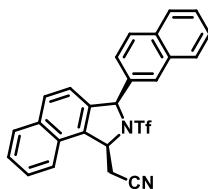

Following the general procedure, Compound **4h** was obtained as colorless liquid (57.8 mg, 0.12 mmol, 62 %) <sup>1</sup>H NMR (400 MHz, CDCl<sub>3</sub>) δ 8.06 (s, 3H), 7.95 (d, *J* = 8.1 Hz, 3H), 7.85 (dd, *J* = 19.1, 11.7 Hz, 1H), 7.73 (d, *J* = 7.9 Hz, 3H), 7.61 – 7.44 (m, 13H), 7.42 (d, *J* = 8.6 Hz, 3H), 6.52 (s, 3H), 5.70 (s, 3H), 3.34 (dd, *J* = 16.9, 3.5 Hz, 3H), 3.14 (s, 3H). <sup>13</sup>C NMR (100 MHz, CDCl<sub>3</sub>) δ 134.01, 133.58, 133.53, 133.03, 129.20, 128.48, 128.41, 128.18, 127.84, 127.39, 127.23, 127.02, 126.75, 125.43, 123.77, 122.34, 116.15, 70.41, 61.91, 26.69. HRMS (ESI-MS) *m/z* calcd. for C<sub>25</sub>H<sub>17</sub>F<sub>3</sub>N<sub>2</sub>O<sub>2</sub>SNa [M+Na]<sup>+</sup> 489.0861; found 489.0843. IR (neat):  $\nu_{\max}/\text{cm}^{-1}$  3058, 2956, 2925, 2852, 2254, 1957, 1508, 1390, 1221, 1152, 1055, 649. HPLC analysis (Chiralpak AD-H; *n*-Hexane/*i*-PrOH = 98/2, 0.5 ml/min, 254 nm): *t<sub>r</sub>*(major) = 58.05 min, *t<sub>r</sub>*(minor) = 52.65 min, 94:6 er. [ $\alpha$ ]<sub>D</sub><sup>30</sup> = +40.0 (*c* = 0.05 in CHCl<sub>3</sub>).

**Compound 4i**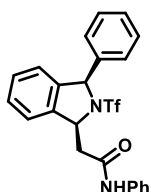

Following the general procedure, Compound **4i** was obtained as a colorless liquid (62.5 mg, 0.13 mmol, 68 %) <sup>1</sup>H NMR (500 MHz, CDCl<sub>3</sub>) δ 7.49 (t, *J* = 8.1 Hz, 3H), 7.36 – 7.26 (m, 6H), 7.12 (t, *J* = 7.5 Hz, 1H), 7.06 (d, *J* = 7.2 Hz, 1H), 6.19 (s, 1H), 5.84 (d, *J* = 6.6 Hz, 1H), 3.30 (dd, *J* = 14.7, 3.7 Hz, 1H), 2.85 (dd, *J* = 14.8, 9.0 Hz, 1H). <sup>13</sup>C NMR (125 MHz, CDCl<sub>3</sub>) δ 166.90, 140.49, 138.14, 137.43, 129.16, 128.90, 128.80, 127.93, 124.80, 123.85, 123.59, 120.10, 70.25, 63.93, 46.38. HRMS (APCI-TOF) *m/z* calcd. for C<sub>23</sub>H<sub>20</sub>F<sub>3</sub>N<sub>2</sub>O<sub>3</sub>S [M+H]<sup>+</sup> 461.1147; found 461.1157. IR (neat):  $\nu_{\max}/\text{cm}^{-1}$  2955, 2955, 2921, 2850, 1660, 1600, 1543, 1497, 1393, 1225, 1189, 1055, 696. HPLC analysis (Chiralpak IC-3; *n*-Hexane/*i*-PrOH = 90/10, 0.9 ml/min, 254 nm): *t<sub>r</sub>*(major) = 9.62 min, *t<sub>r</sub>*(minor) = 8.93 min, 90:10 er. [ $\alpha$ ]<sub>D</sub><sup>30</sup> = +86.90 (*c* = 0.023 in CHCl<sub>3</sub>).

**Compound 4j**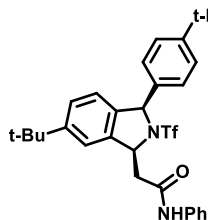

Following the general procedure, Compound **4j** was obtained as a colorless liquid (80 mg, 0.14 mmol, 70 %) <sup>1</sup>H NMR (500 MHz, CDCl<sub>3</sub>) δ 7.48 (t, *J* = 9.0 Hz, 2H), 7.45 (s, 1H), 7.38 – 7.27 (m, 5H), 7.21 (d, *J* = 8.3 Hz, 2H), 7.16 (brs, 1H), 7.12 (t, *J* = 7.4 Hz, 1H), 7.02 (d, *J* = 8.2 Hz, 1H), 6.15 (s, 1H), 5.79 (s, 1H), 3.30 (dd, *J* = 14.4, 4.2 Hz, 1H), 2.80 (dd, *J* = 14.3, 8.9 Hz, 1H), 1.29 (s, 9H), 1.24 (s, 9H). <sup>13</sup>C NMR (125 MHz, CDCl<sub>3</sub>) δ 166.98, 157.49, 152.62, 151.62, 150.03, 137.99, 137.63, 137.47, 137.29, 135.48, 129.13, 127.41, 126.50, 125.76, 124.74, 123.30, 120.00, 69.82, 64.07, 47.02, 35.00, 34.67, 31.40, 31.35. HRMS (APCI-TOF) *m/z* calcd. for C<sub>31</sub>H<sub>36</sub>F<sub>3</sub>N<sub>2</sub>O<sub>3</sub>S [M+H]<sup>+</sup> 573.2399; found 573.2405 IR (neat):  $\nu_{\max}/\text{cm}^{-1}$  2959, 2925, 2868, 1660, 1601, 1544, 1498, 1378, 1225, 1188, 1059, 691. HPLC analysis (Chiralpak AD-H; *n*-Hexane/*i*-PrOH = 95/5, 0.9 ml/min, 254 nm): *t<sub>r</sub>*(major) = 8.02 min, *t<sub>r</sub>*(minor) = 6.28 min, 90:10 er. [ $\alpha$ ]<sub>D</sub><sup>30</sup> = +40.00 (*c* = 0.05 in CHCl<sub>3</sub>).

**Compound 4k**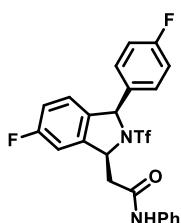

Following the general procedure, Compound **4k** was obtained as a yellow liquid (59.5 mg, 0.12 mmol, 60 %) <sup>1</sup>H NMR (400 MHz, CDCl<sub>3</sub>) δ 7.45 (d, *J* = 8.1 Hz, 2H), 7.31 (dd, *J* = 15.3, 7.2 Hz, 2H), 7.27 – 7.18 (m, 4H), 7.13 (t, *J* = 7.3 Hz, 1H), 7.03 (dd, *J* = 9.6, 7.5 Hz, 1H), 6.94 (dd, *J* = 16.3, 8.0 Hz, 3H), 6.12 (s, 1H), 5.77 (d, *J* = 8.0 Hz, 1H), 3.27 (dd, *J* = 14.9, 3.0 Hz, 1H), 2.88 (dd, *J* = 15.1, 9.1 Hz, 1H). <sup>13</sup>C NMR (100 MHz, CDCl<sub>3</sub>) δ 166.52, 164.59, 164.18, 162.09, 161.69, 140.17, 137.20, 136.08, 133.56, 130.06, 129.98, 129.19, 125.35, 125.26, 124.98, 120.11, 117.12, 116.89, 115.99, 115.77, 111.23, 110.98, 69.14, 63.53, 45.60. HRMS (ESI-MS) *m/z* calcd. for C<sub>23</sub>H<sub>17</sub>F<sub>3</sub>N<sub>2</sub>O<sub>3</sub>SNa [M+Na]<sup>+</sup> 519.0773; found 519.0778. IR (neat):  $\nu_{\max}/\text{cm}^{-1}$  2919, 2956, 2851, 1660, 1602, 1547, 1510, 1444, 1394, 1225, 1192, 1055, 617. HPLC analysis (Chiralpak IC-3; *n*-Hexane/*i*-PrOH = 95/5, 0.9 ml/min, 254 nm): *t<sub>r</sub>*(major) = 12.13 min, *t<sub>r</sub>*(minor) = 10.69, 86:14 er. [ $\alpha$ ]<sub>D</sub><sup>30</sup> = +12.00 (*c* = 0.25 in CHCl<sub>3</sub>).

**Compound 4l**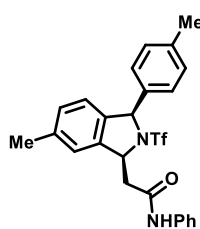

Following the general procedure, Compound **4l** was obtained as a colorless liquid (70.3 mg, 0.14 mmol, 72 %) <sup>1</sup>H NMR (400 MHz, CDCl<sub>3</sub>) δ 7.46 (d, *J* = 8.0 Hz, 2H), 7.31 (dd, *J* = 14.8, 7.1 Hz, 3H), 7.11 (dt, *J* = 23.0, 8.5 Hz, 6H), 6.92 (d, *J* = 7.8 Hz, 1H), 6.11 (s, 1H), 5.75 (d, *J* = 7.1 Hz, 1H), 3.24 (dd, *J* = 14.7, 3.4 Hz, 1H), 2.83 (dd, *J* = 14.8, 8.7 Hz, 1H), 2.33 (s, 3H), 2.30 (s, 3H). <sup>13</sup>C NMR (100 MHz, CDCl<sub>3</sub>) δ 167.01, 139.24, 138.62, 138.37, 137.78, 137.44, 135.47, 130.13, 129.52, 129.12, 127.89, 124.74, 123.79, 123.53, 120.13, 69.91, 63.77, 46.54, 21.49, 21.23. HRMS (ESI-MS) *m/z* calcd. for C<sub>25</sub>H<sub>23</sub>F<sub>3</sub>N<sub>2</sub>O<sub>3</sub>SNa [M+Na]<sup>+</sup> 511.1279; found 511.1260 IR (neat):  $\nu_{\max}/\text{cm}^{-1}$  2955, 2923, 2851, 1655, 1600, 1548, 1443, 1378, 1225, 1188, 1055, 652. HPLC analysis (Chiralpak AD-H; *n*-Hexane/*i*-PrOH = 95/5, 0.9 ml/min, 254 nm): *t<sub>r</sub>*(major) = 12.47 min, *t<sub>r</sub>*(minor) = 10.62 min, 91:9 er. [ $\alpha$ ]<sub>D</sub><sup>30</sup> = +7.69 (*c* = 0.13 in CHCl<sub>3</sub>).

## 4. NMR spectra of Diarylmethyltriflamides 1

S#712703

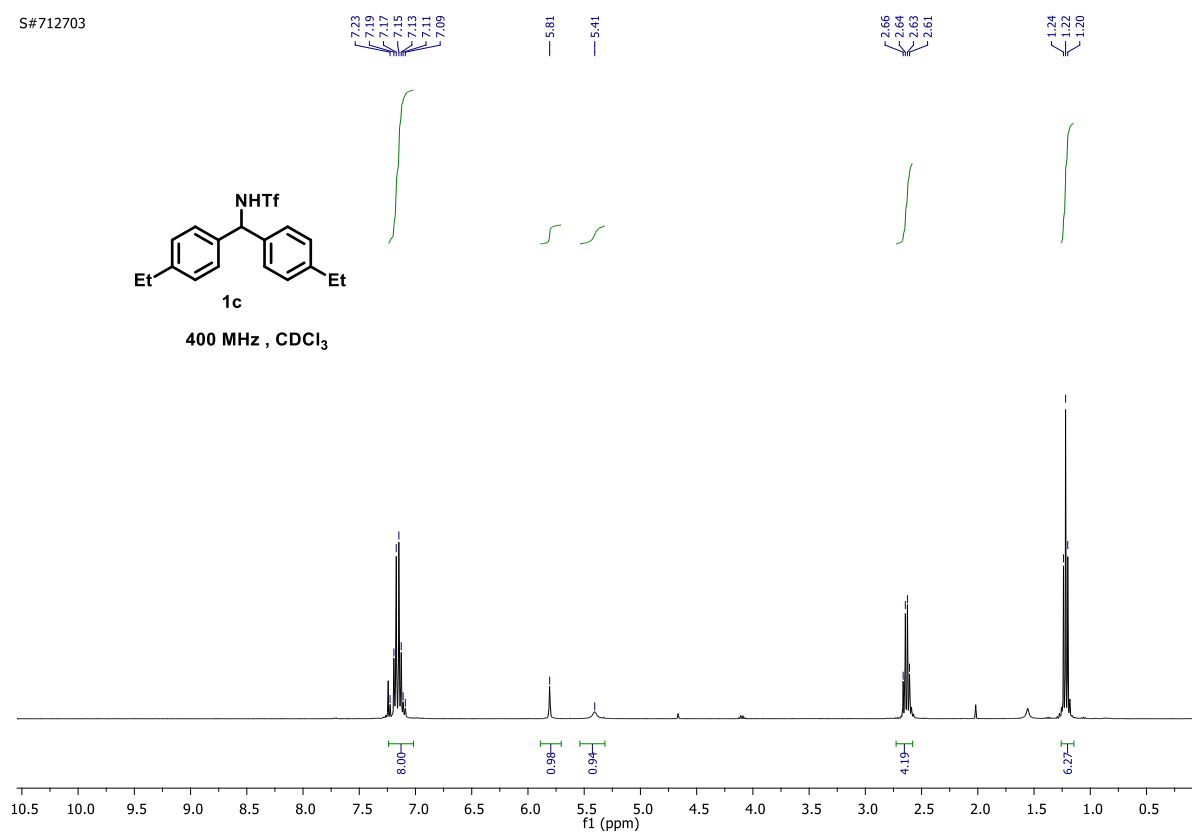

VK1010  
single pulse decoupled gated NOE

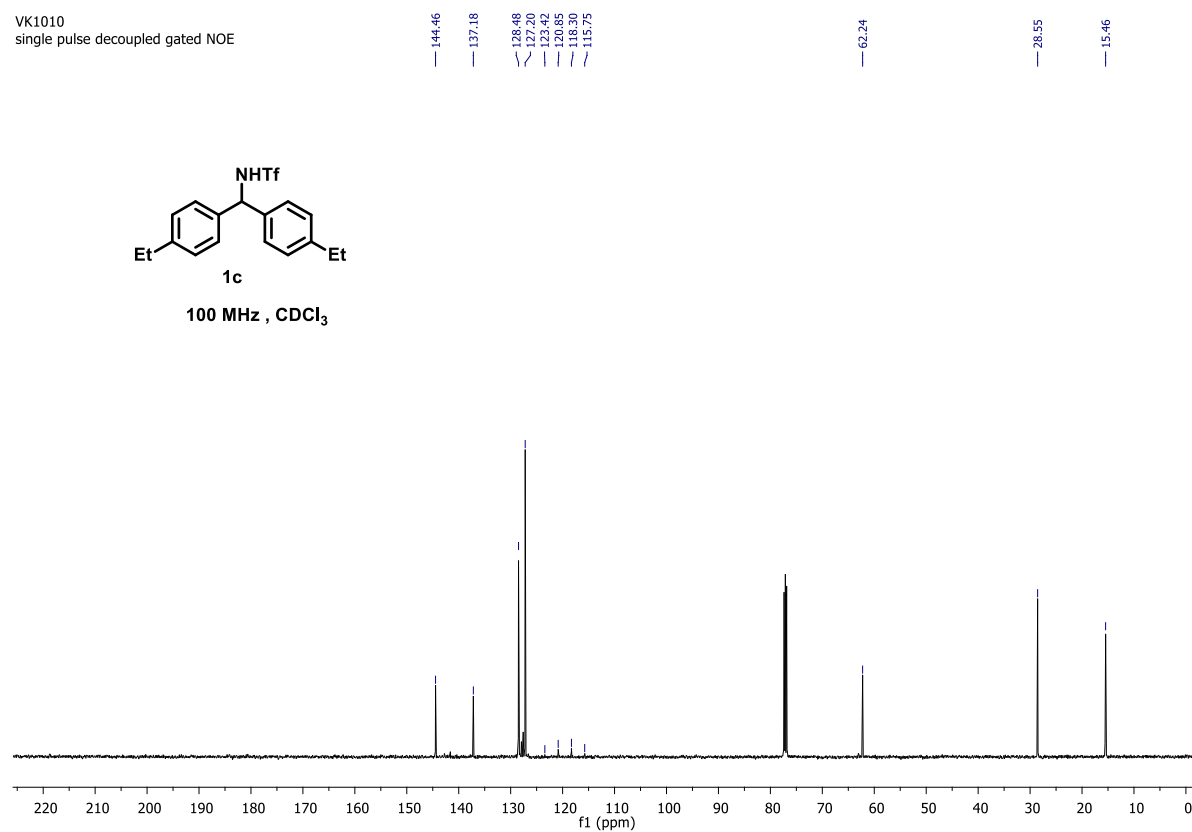

S#384604

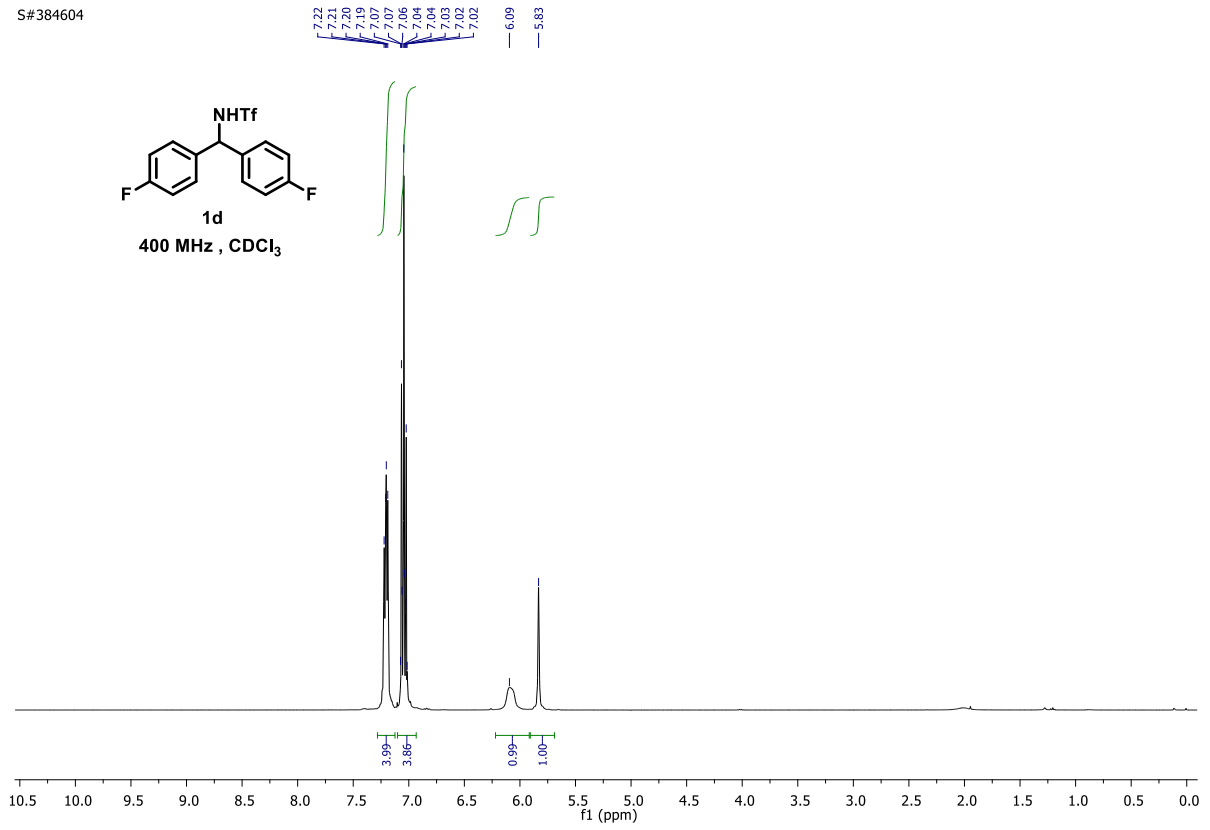

S#473689

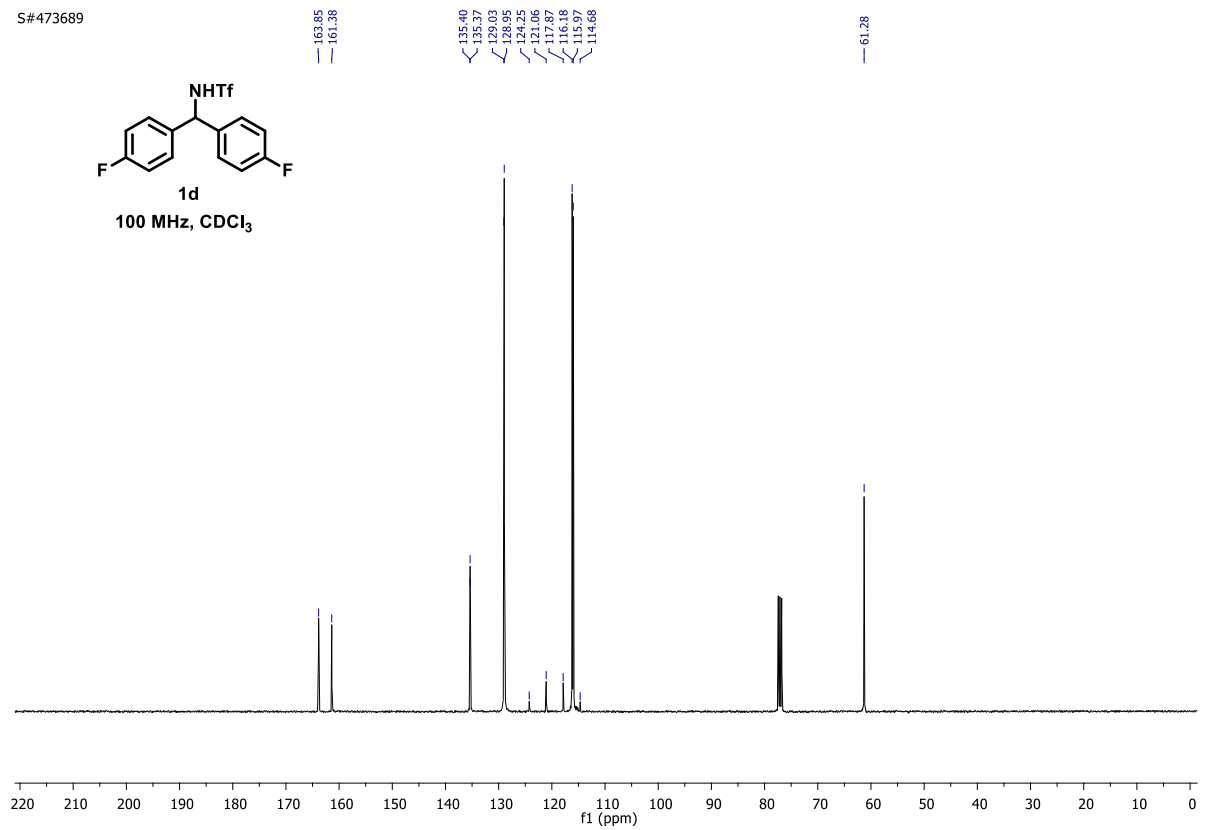

S#362070

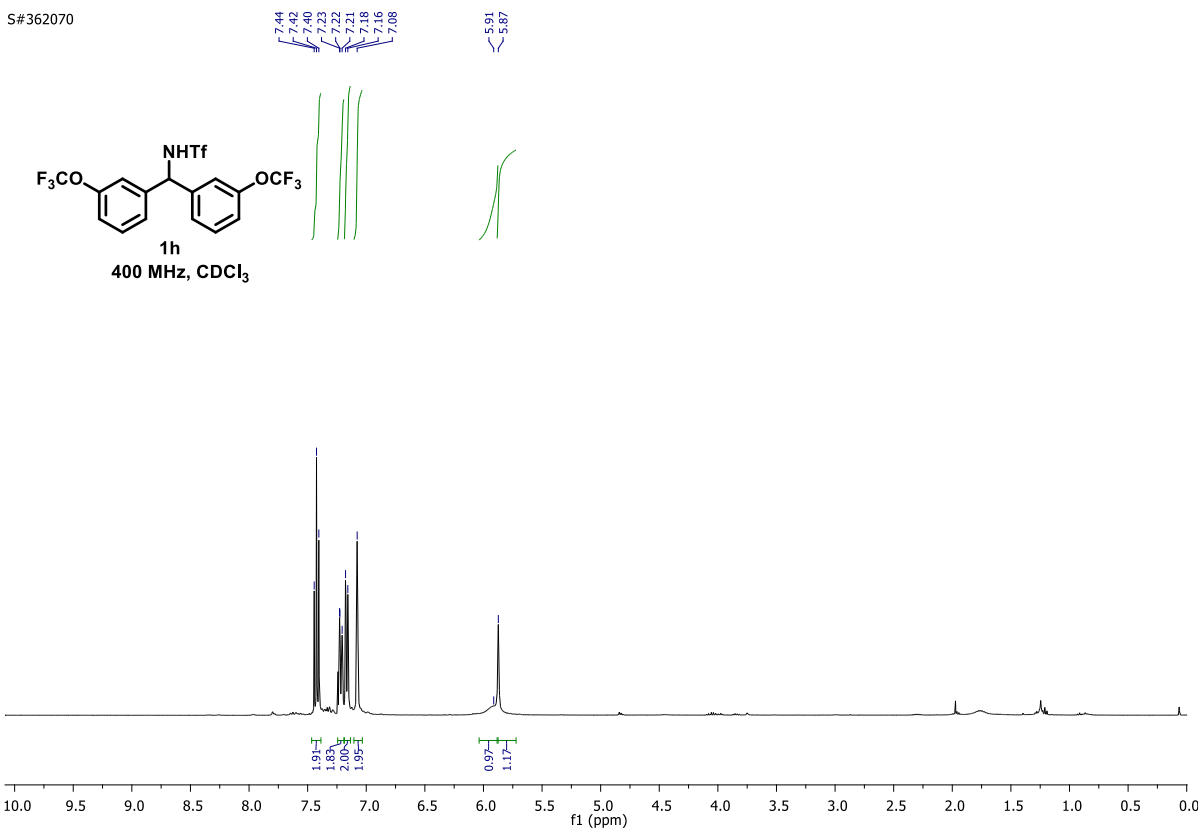

S#739163

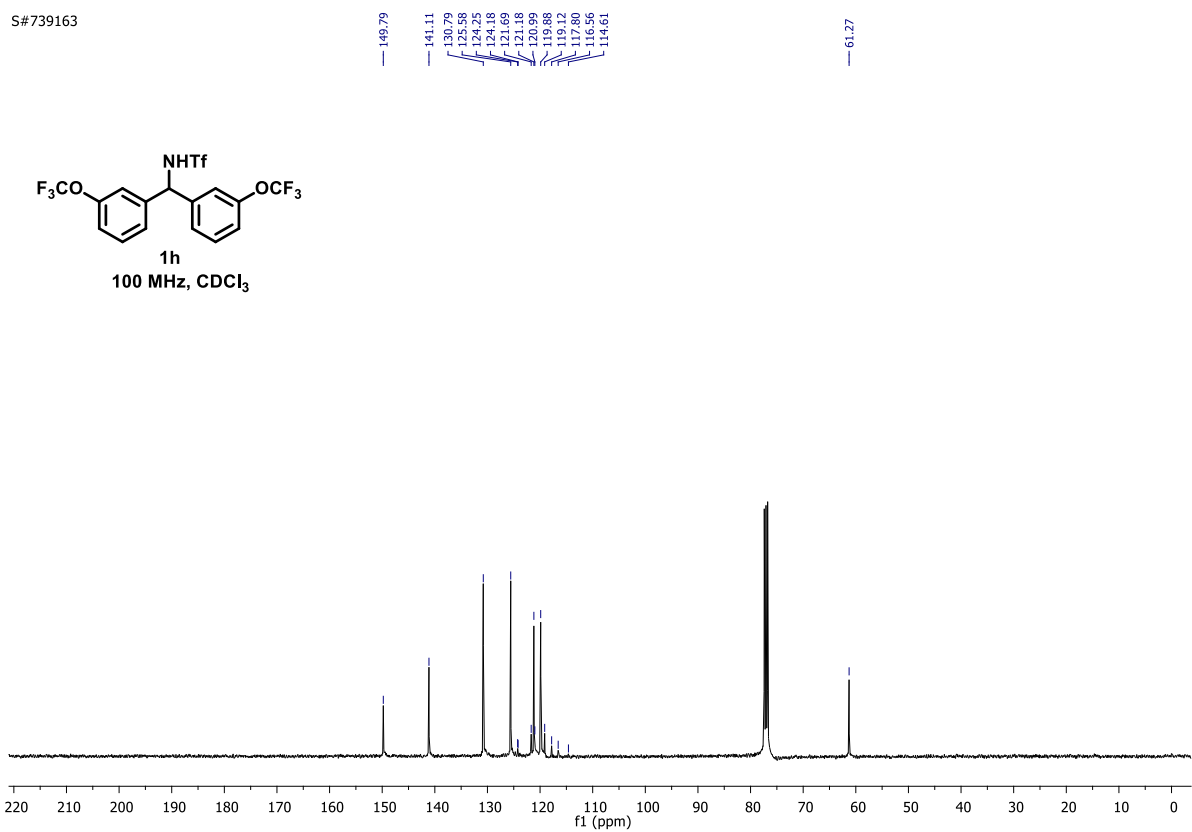

VK1188C

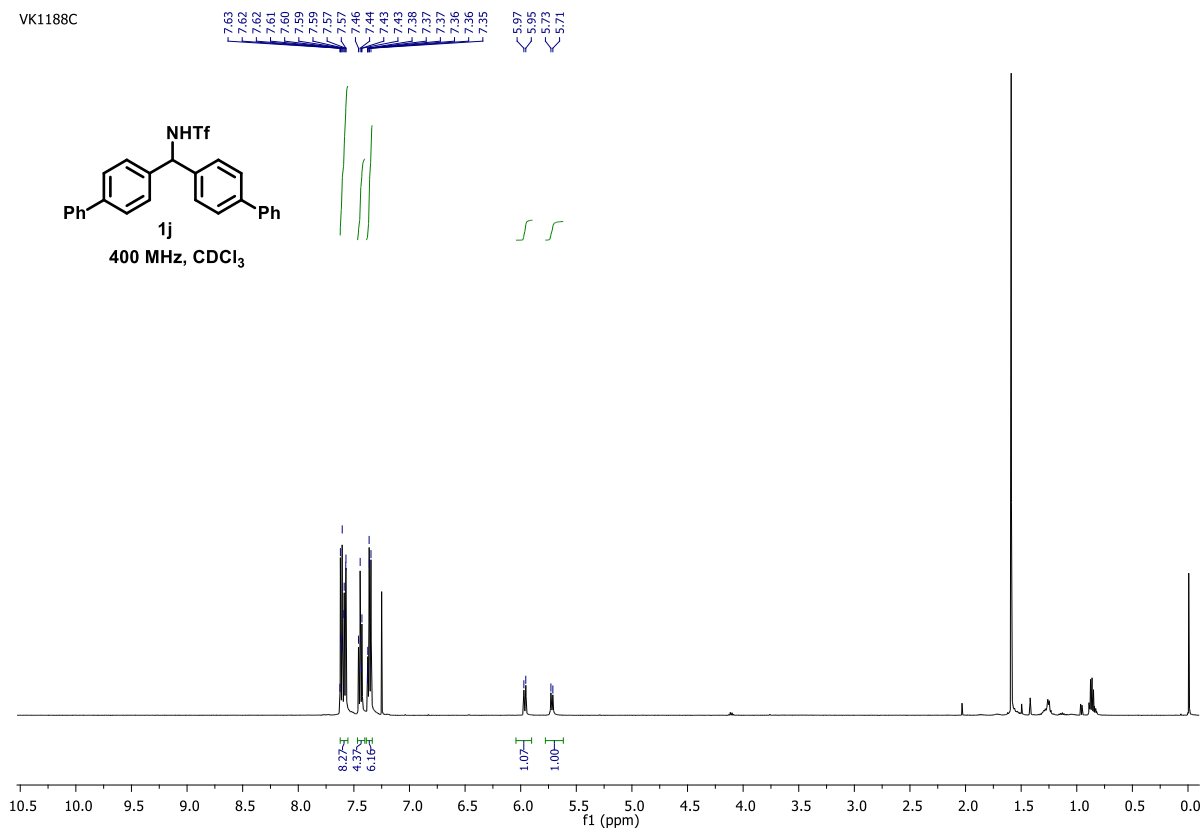

VK1188CP

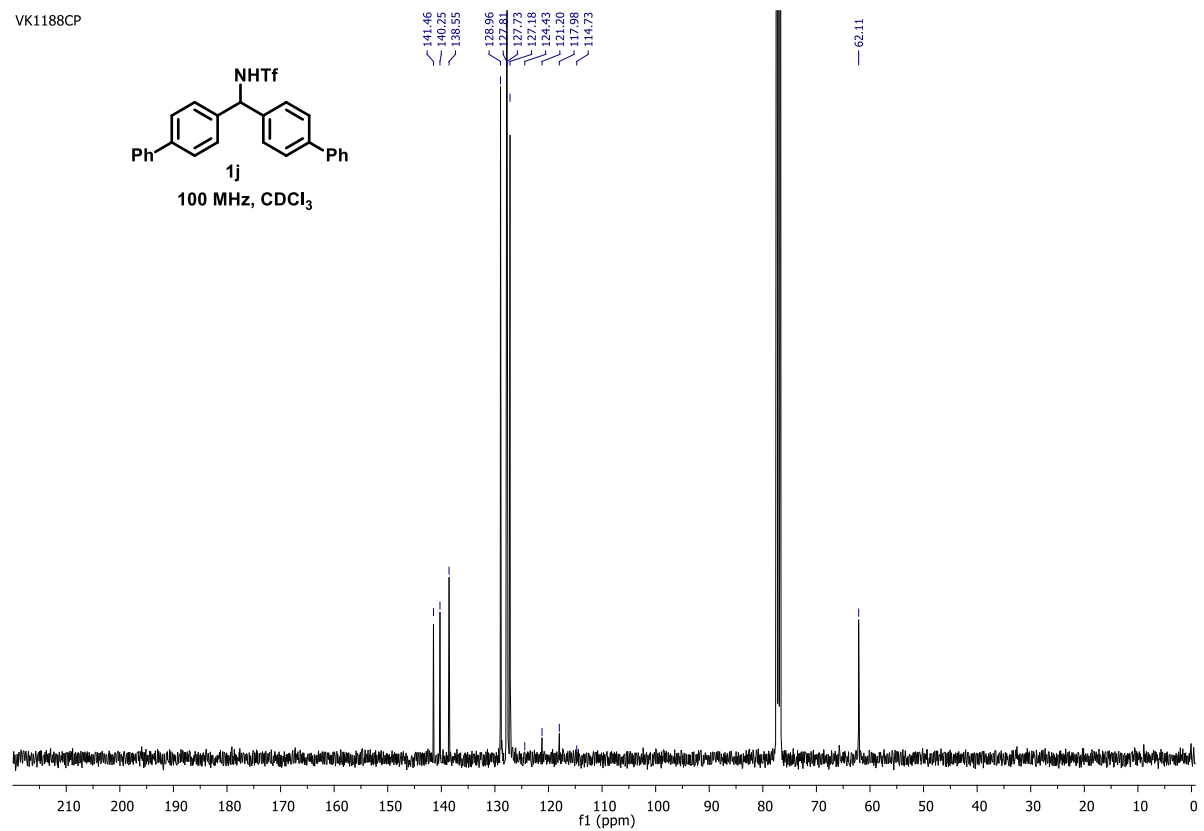

VK1137  
single\_pulse

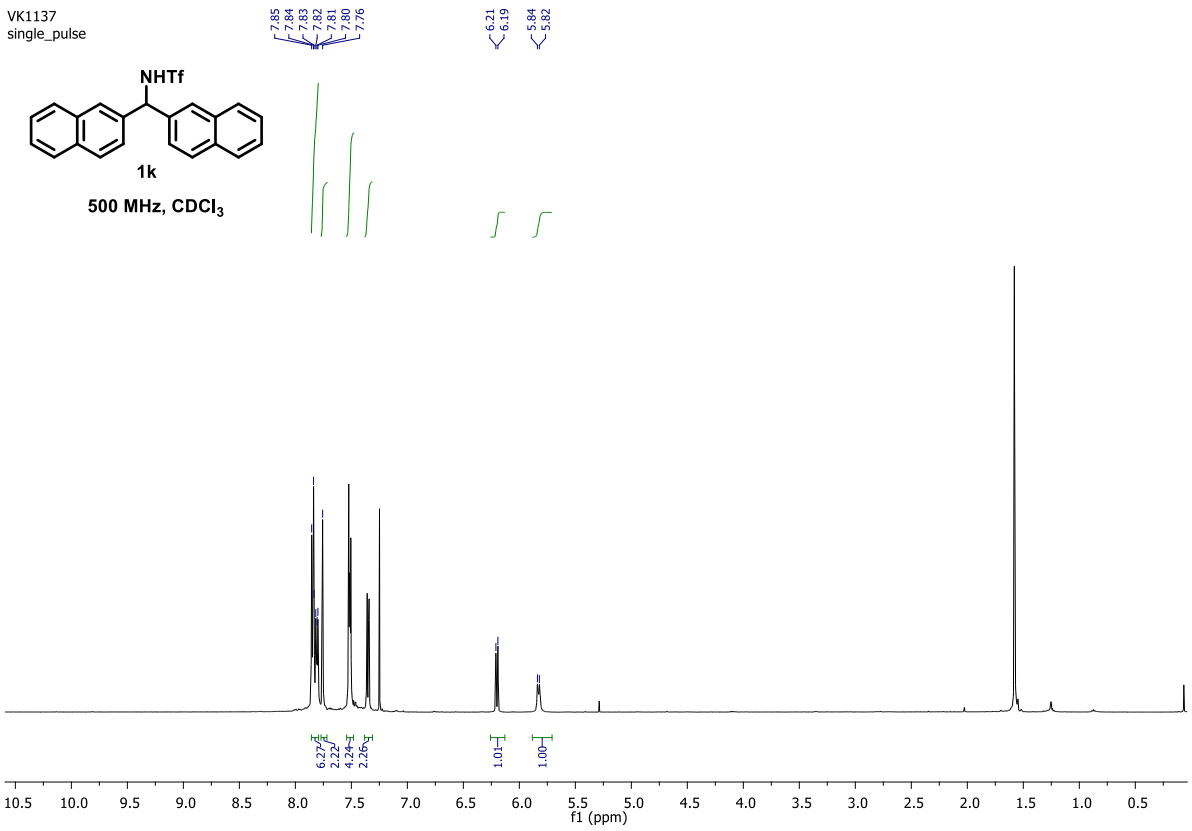

VK1137

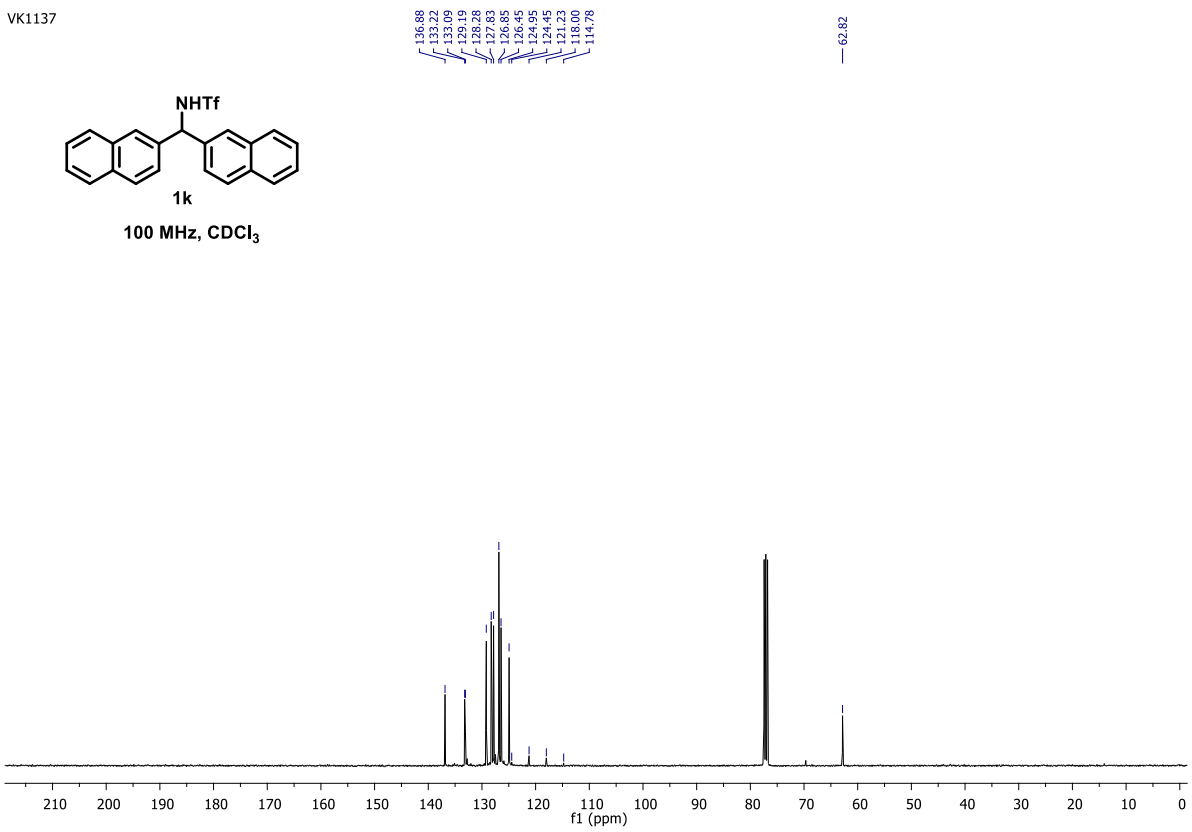

VK1100P  
single\_pulse

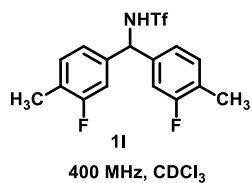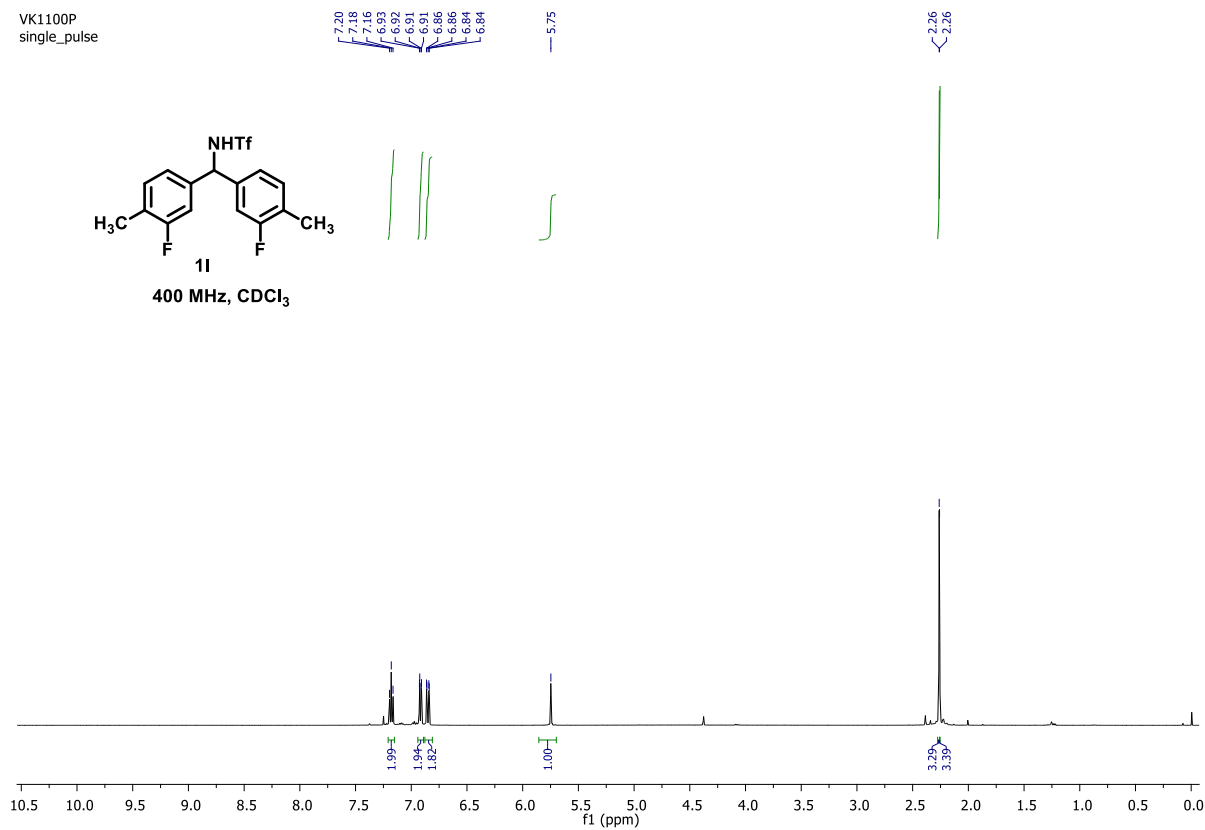

VK1100P  
single pulse decoupled gated NOE

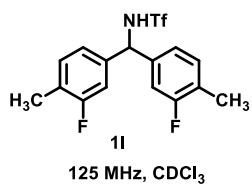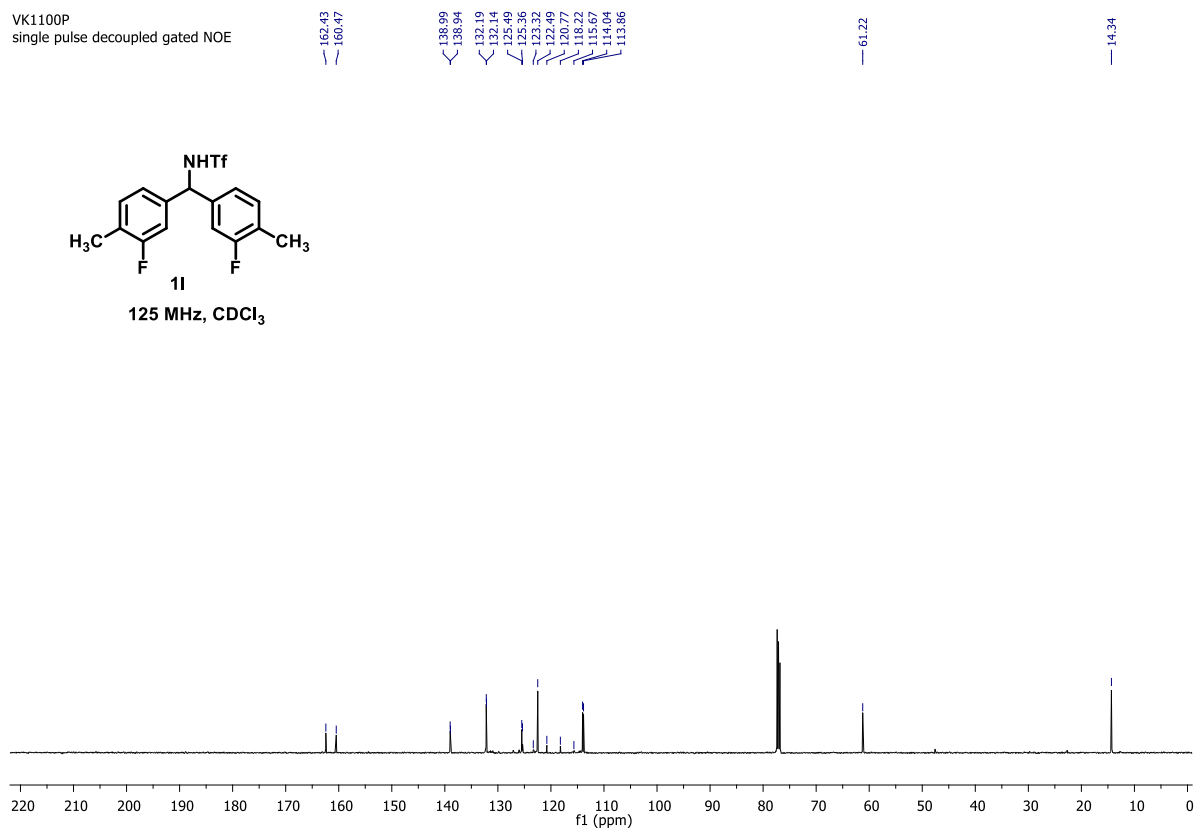



VK1236PP

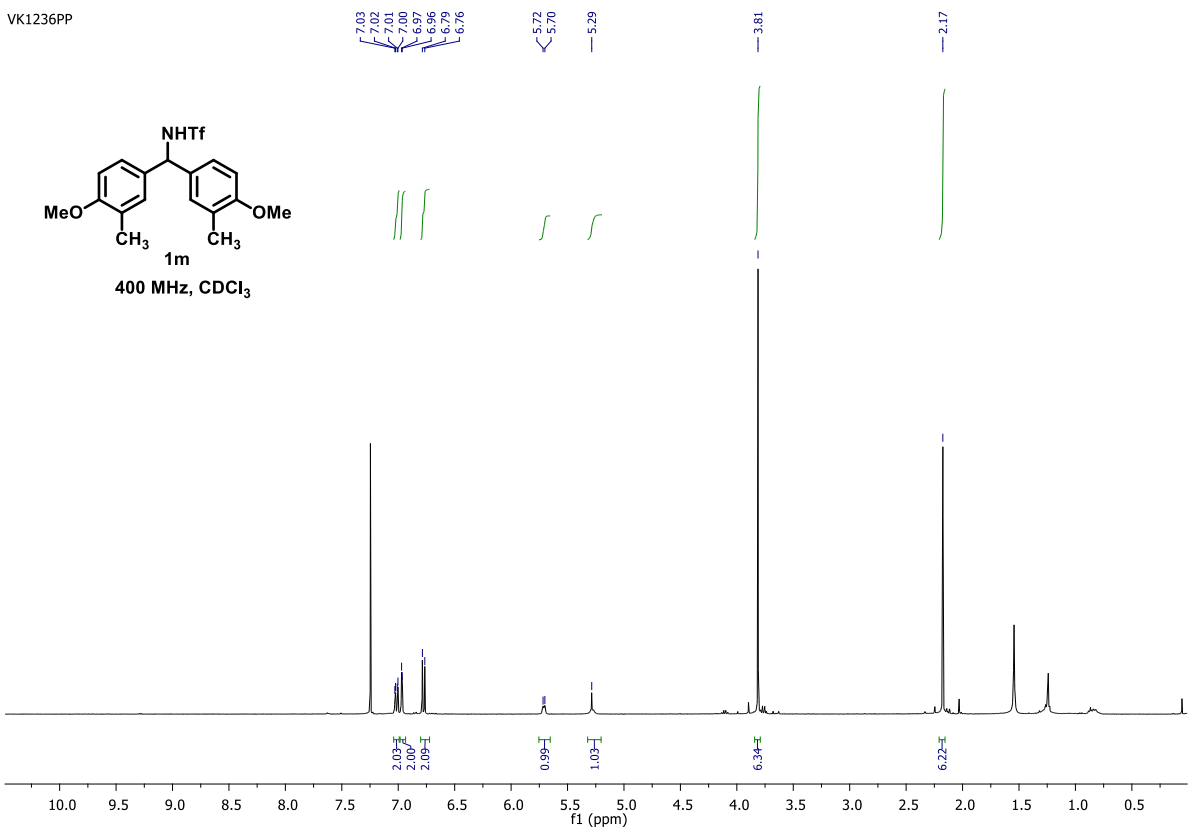

S#613877

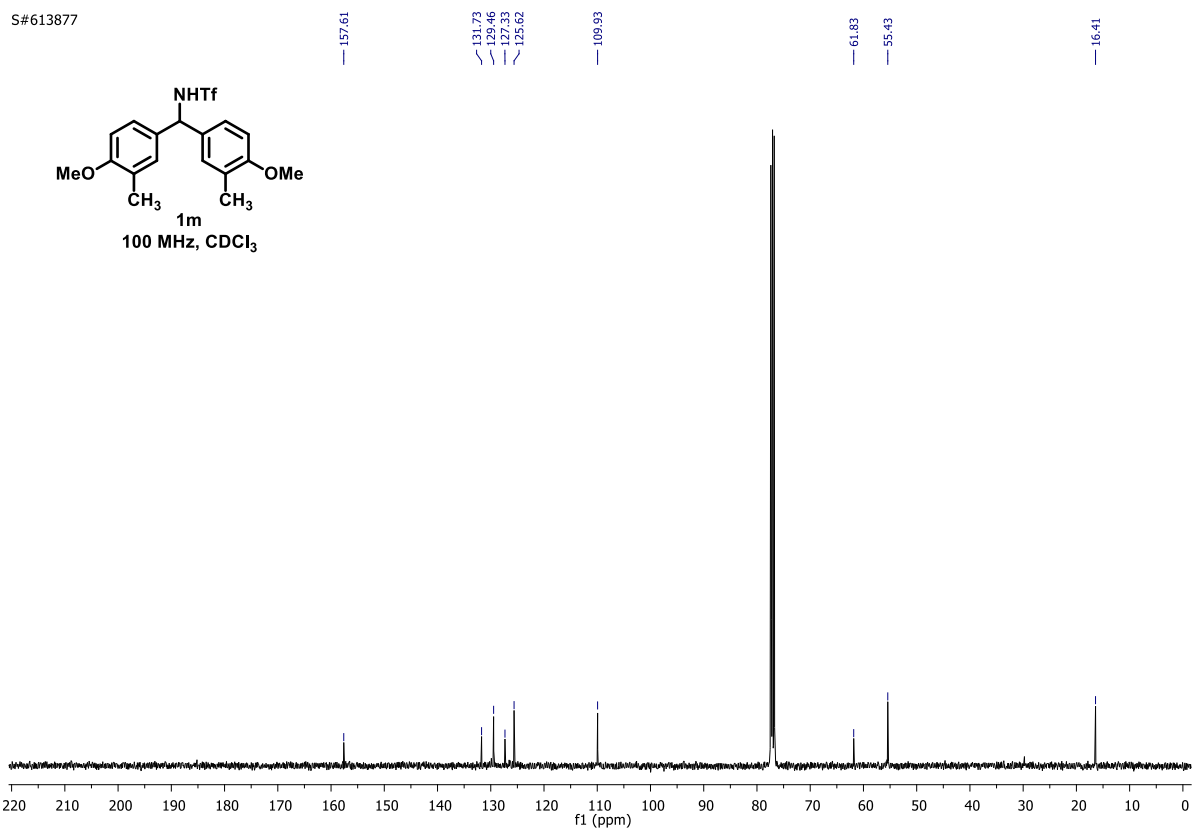

MMS1629

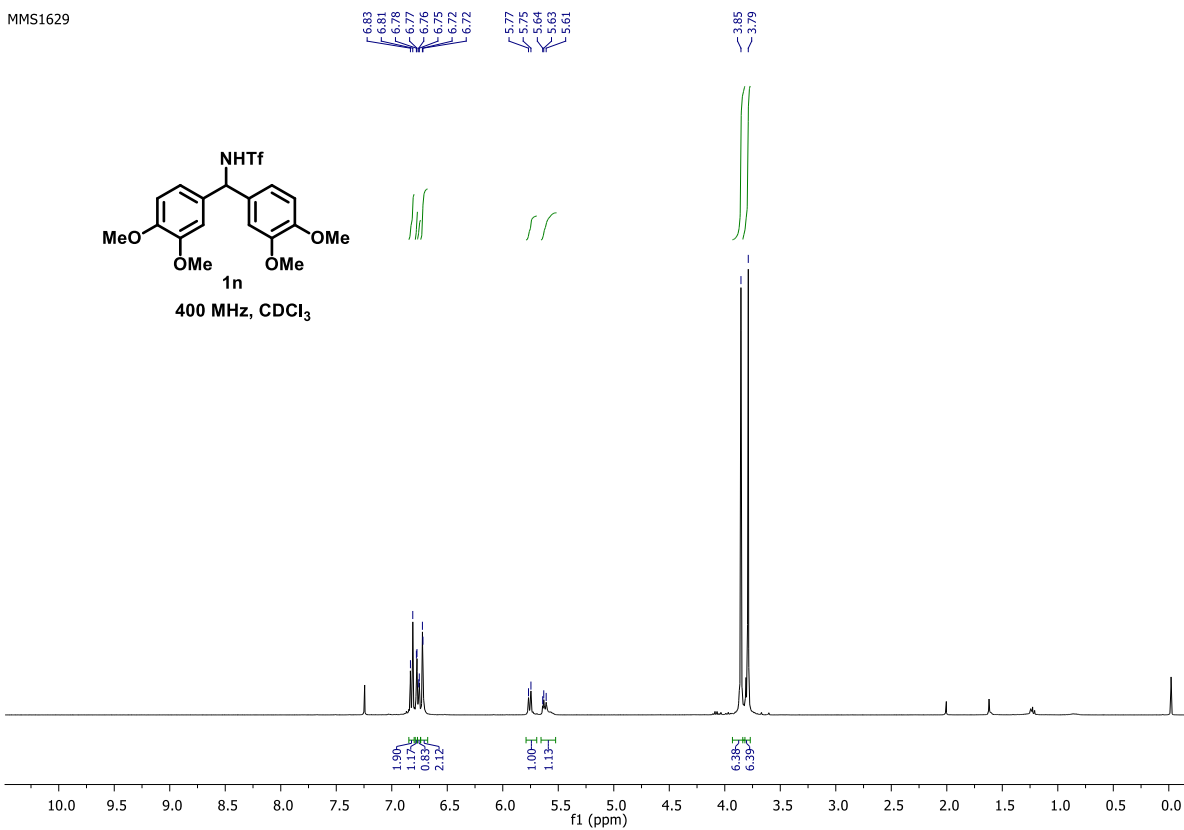

MMS1629

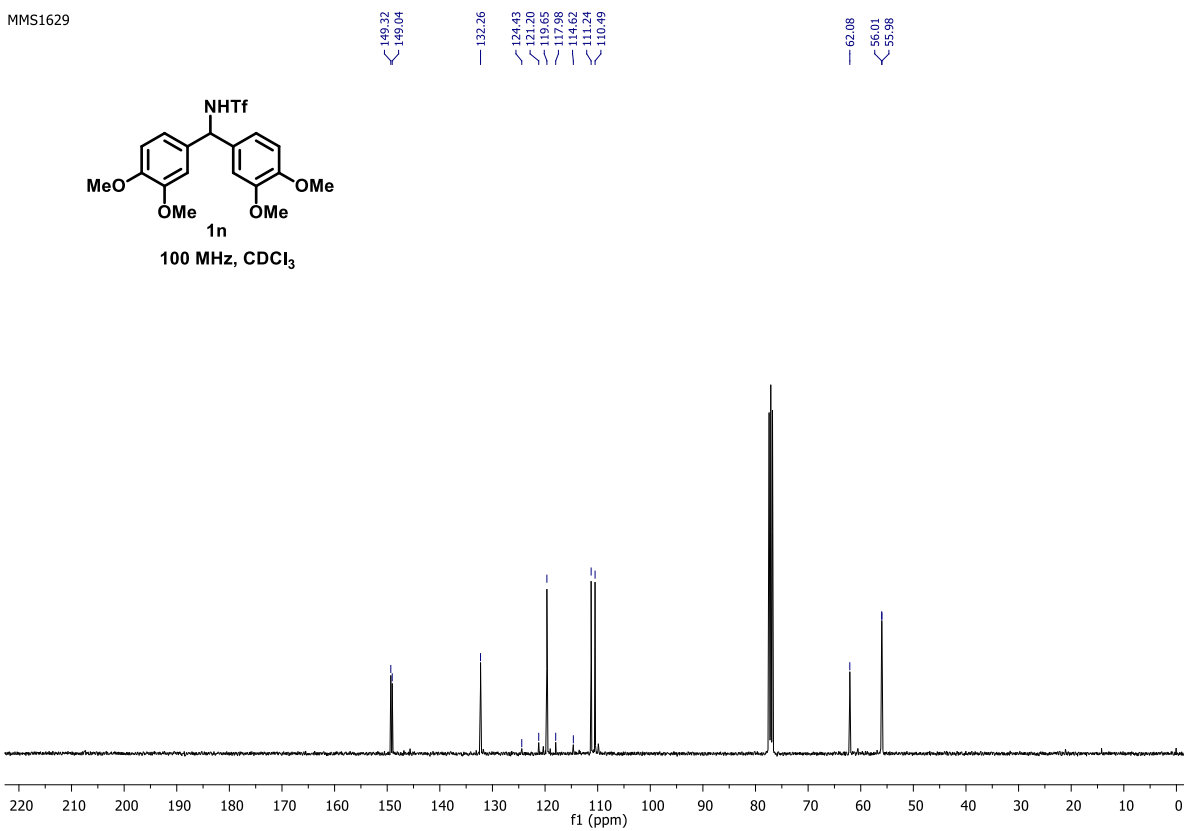

## 5. NMR spectra of compound 3 and 4

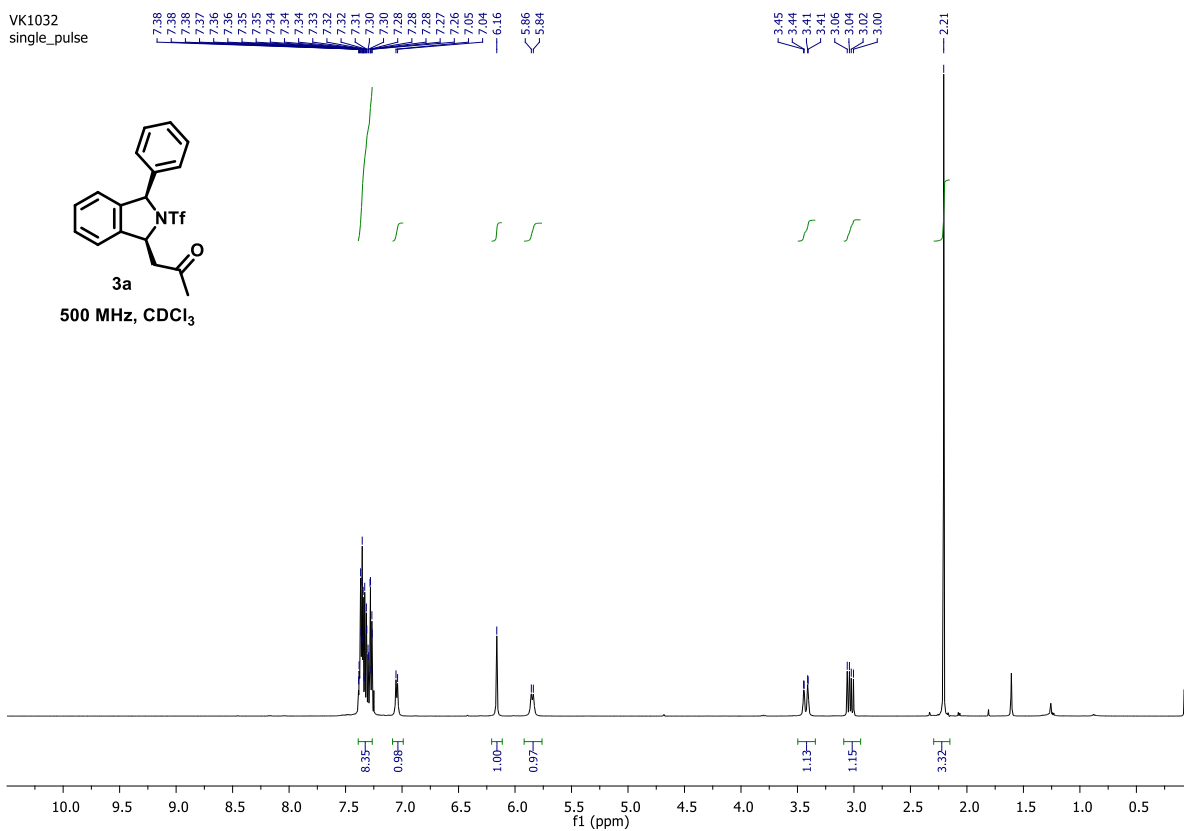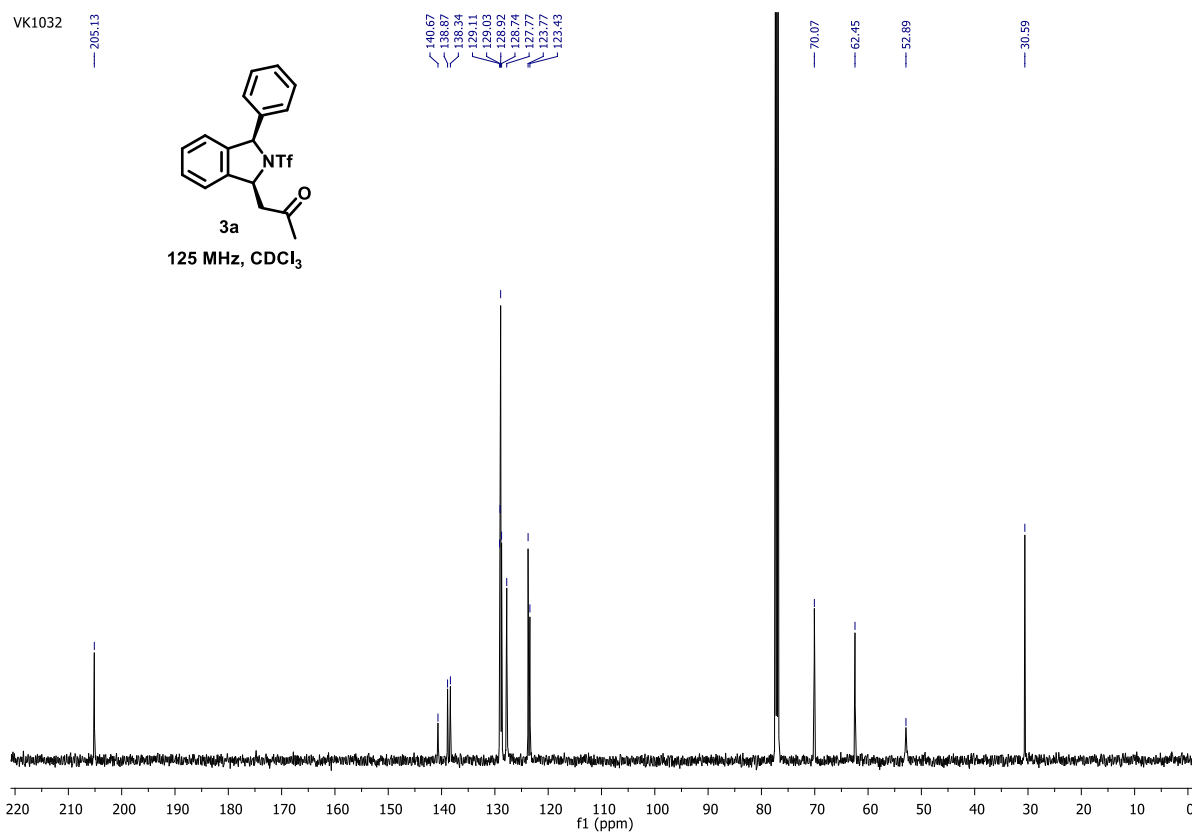

VK1035PA

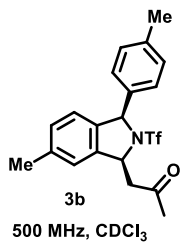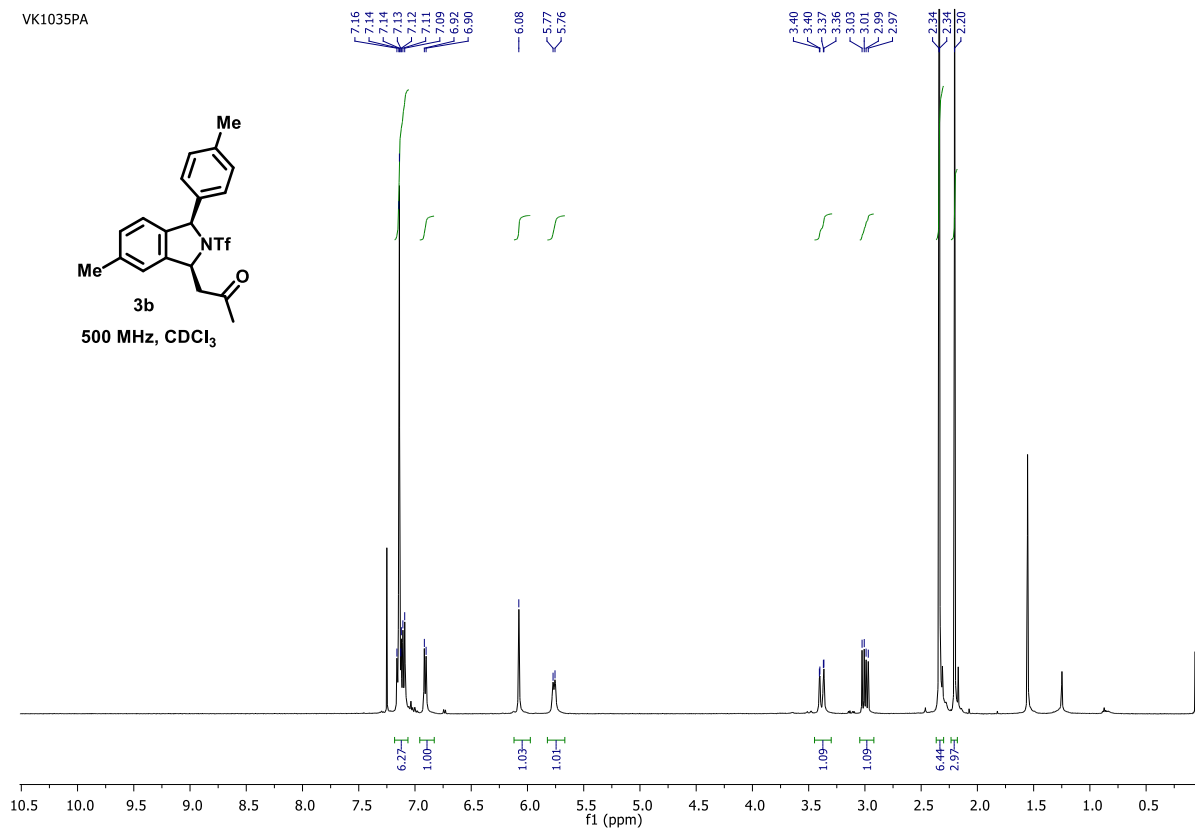

VK1035PA

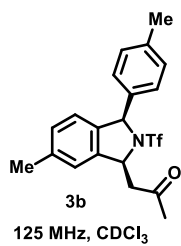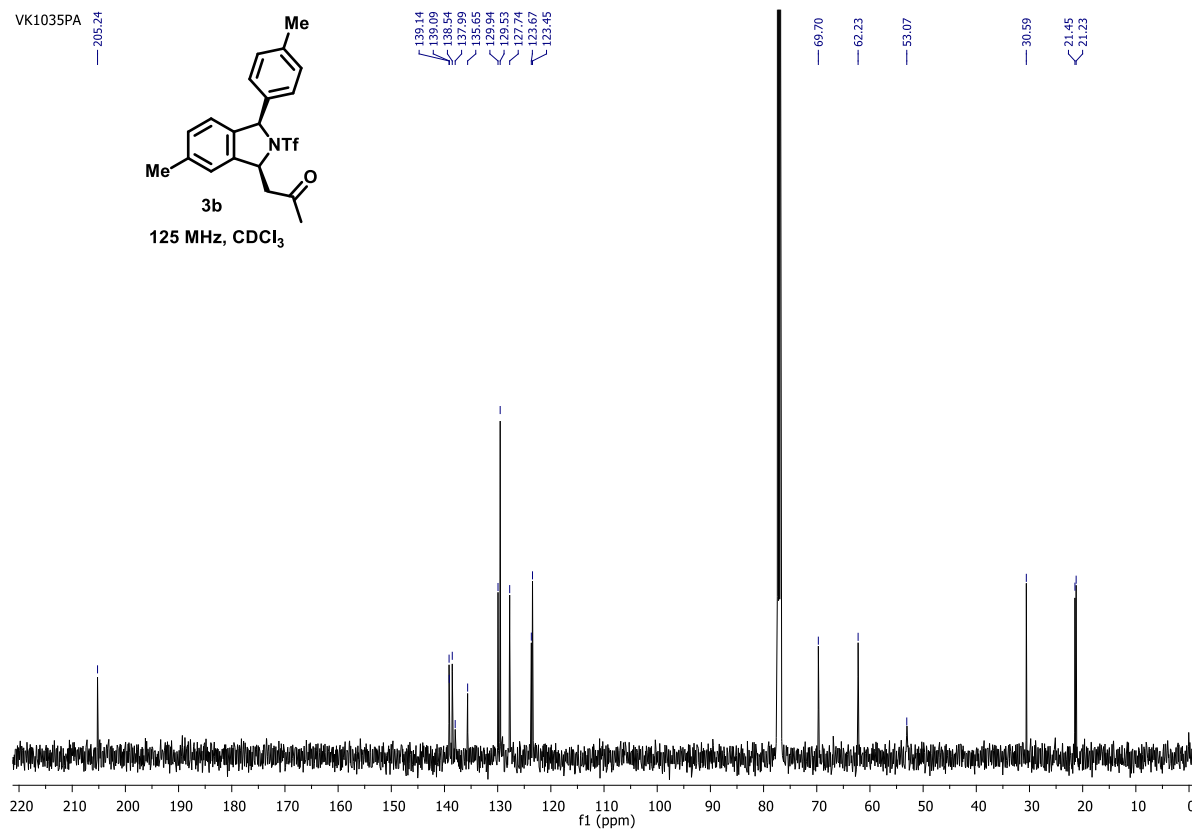

VK1013  
single\_pulse

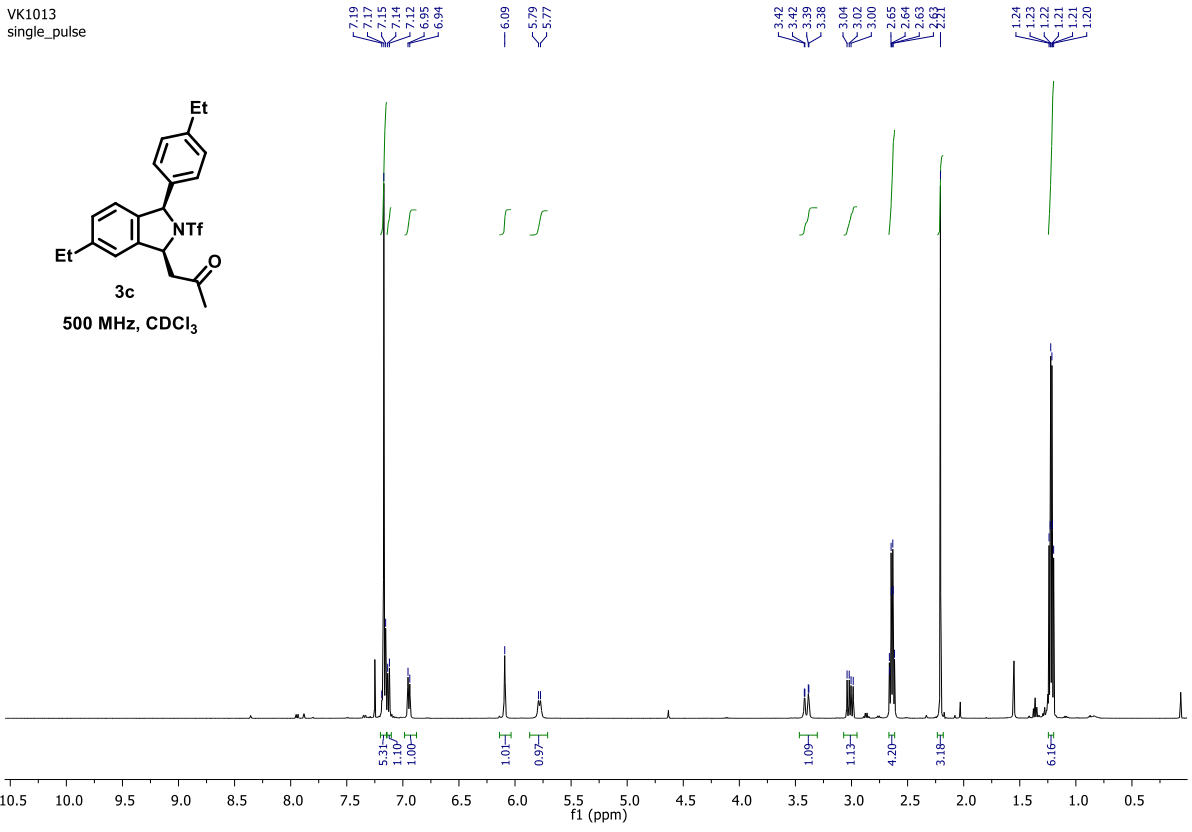

VK1013  
single pulse decoupled gated NOE

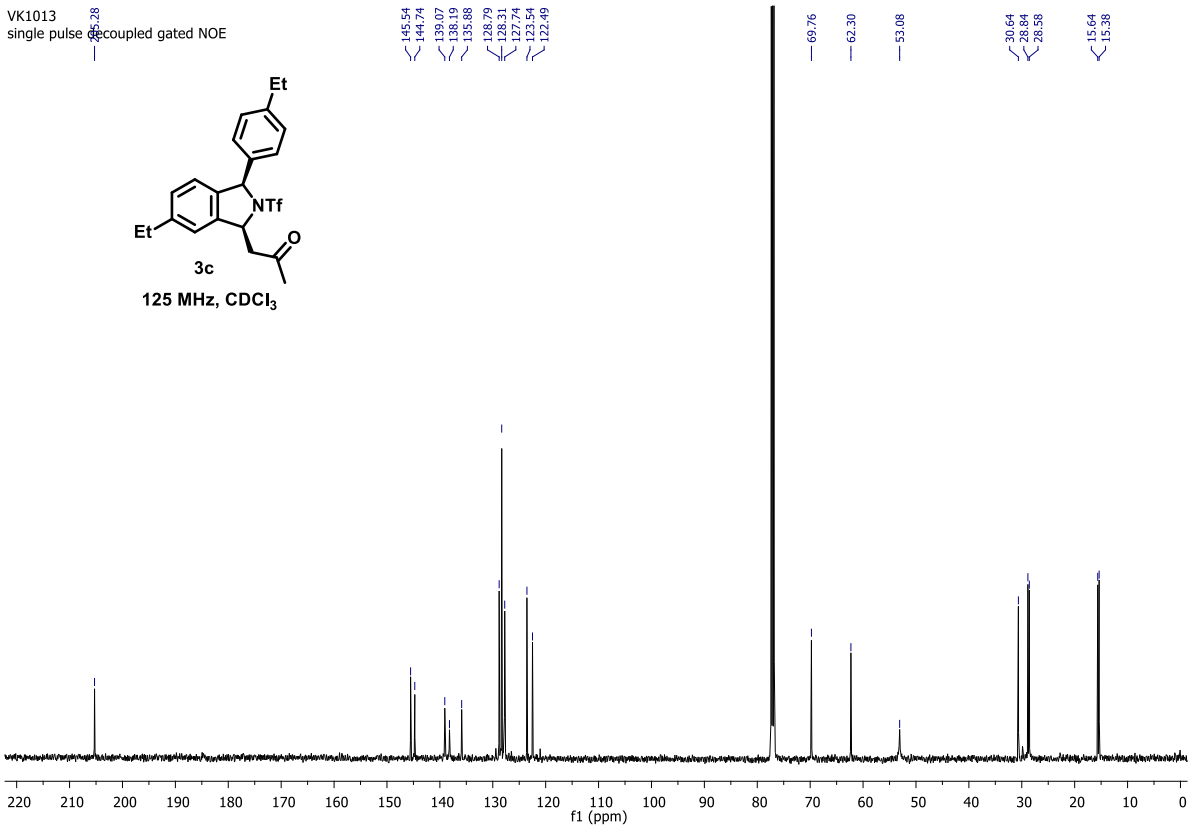

S#687441

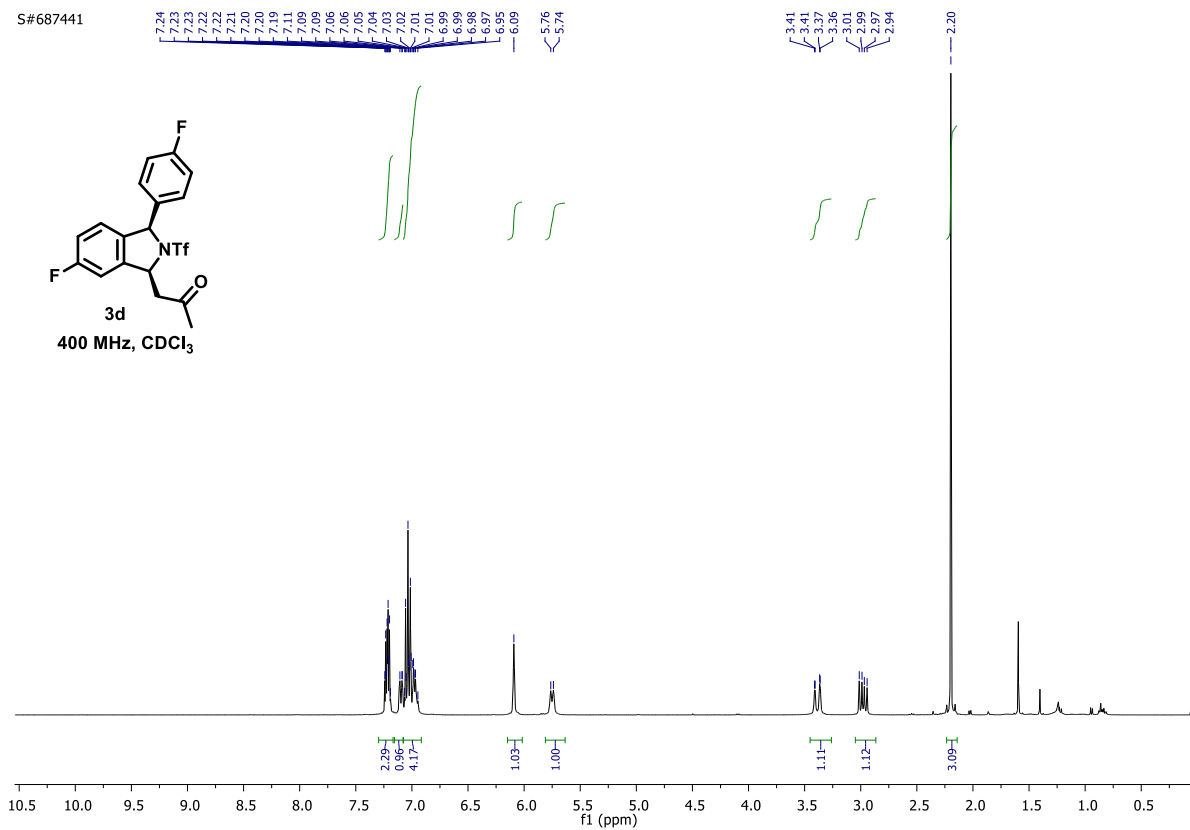

VK1027

single pulse decoupled gated NOE

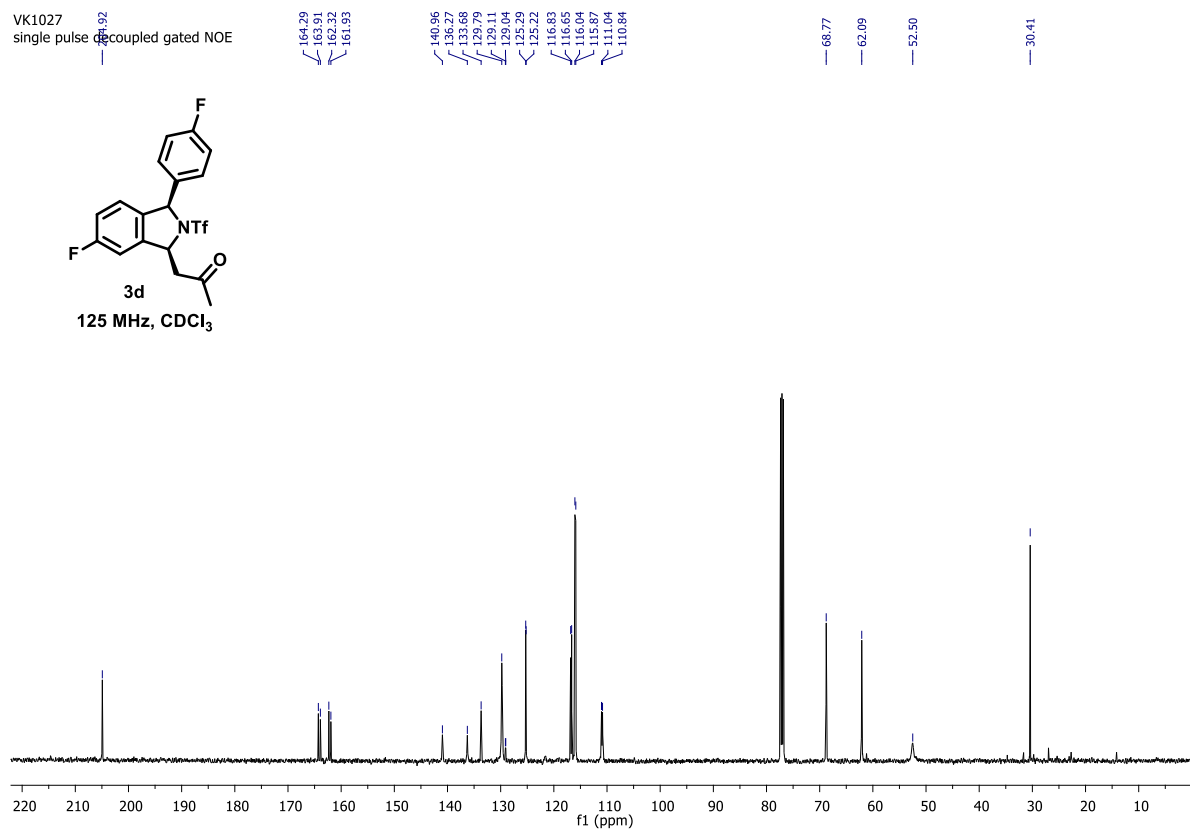

MMS1532  
single\_pulse

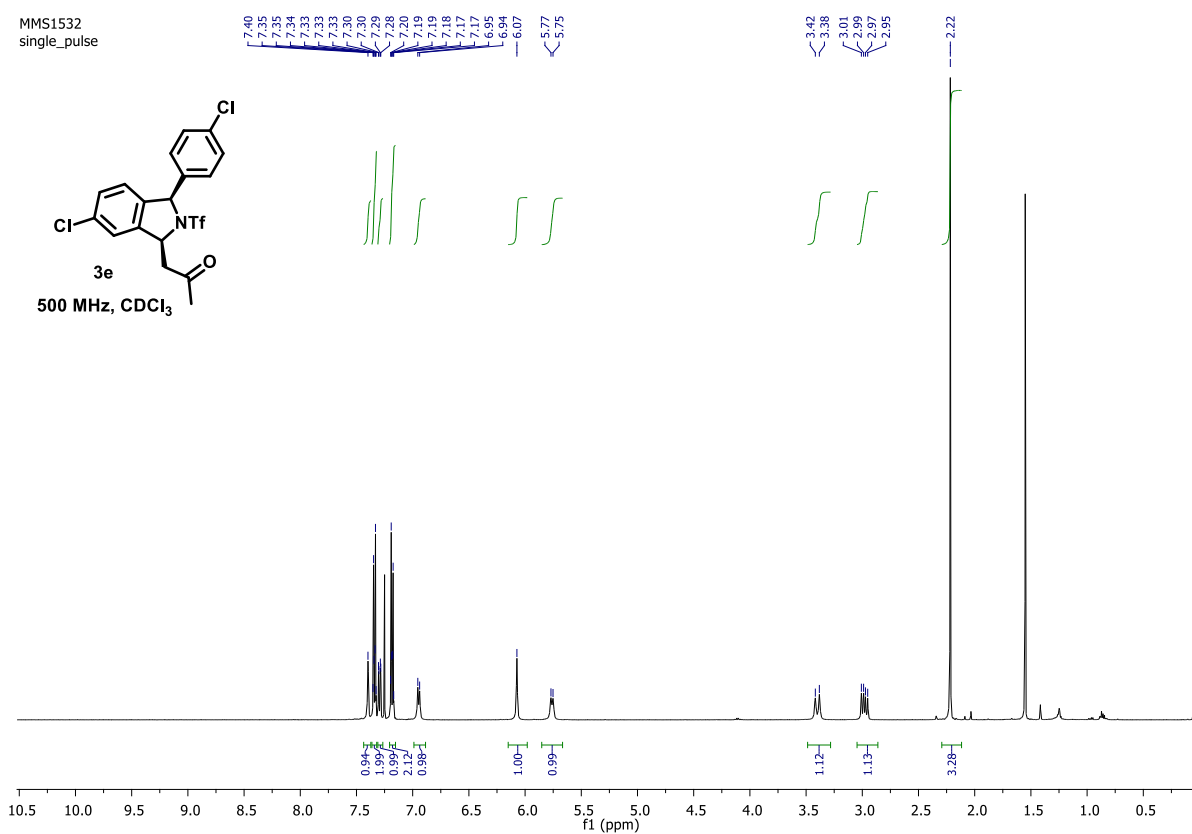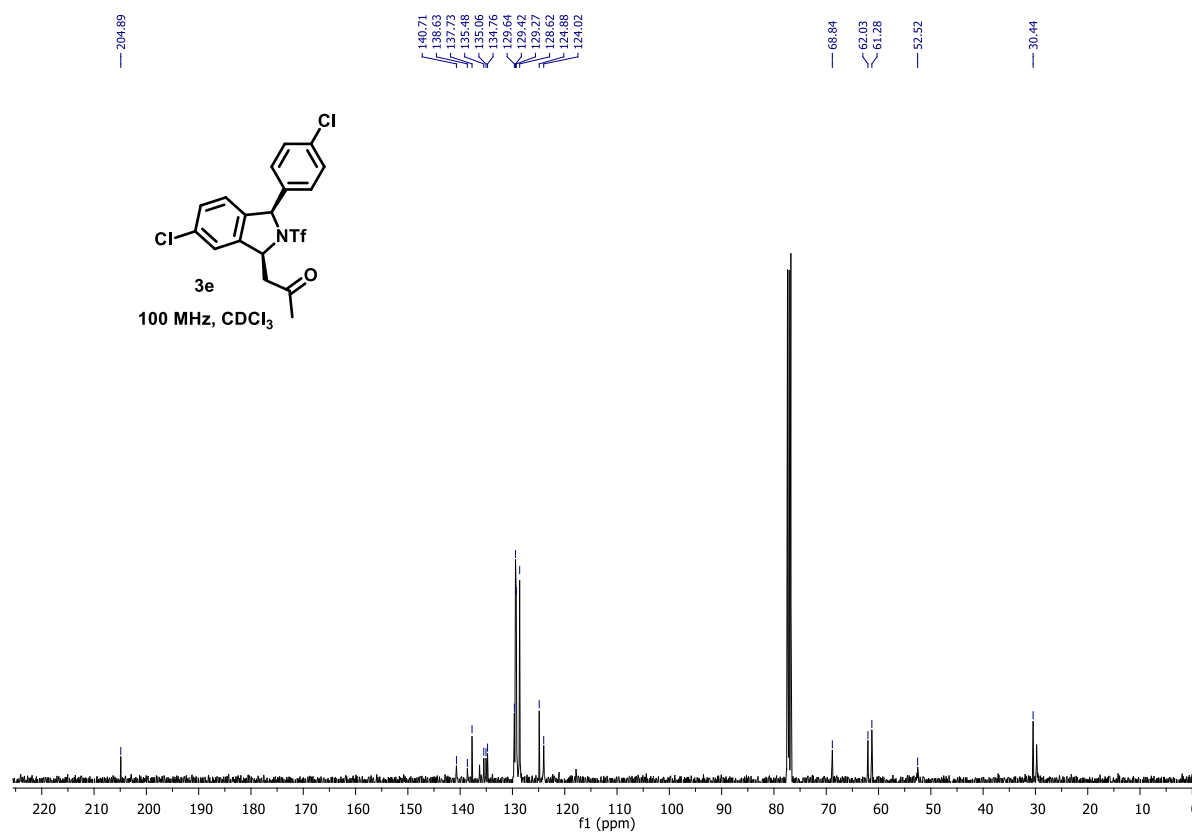

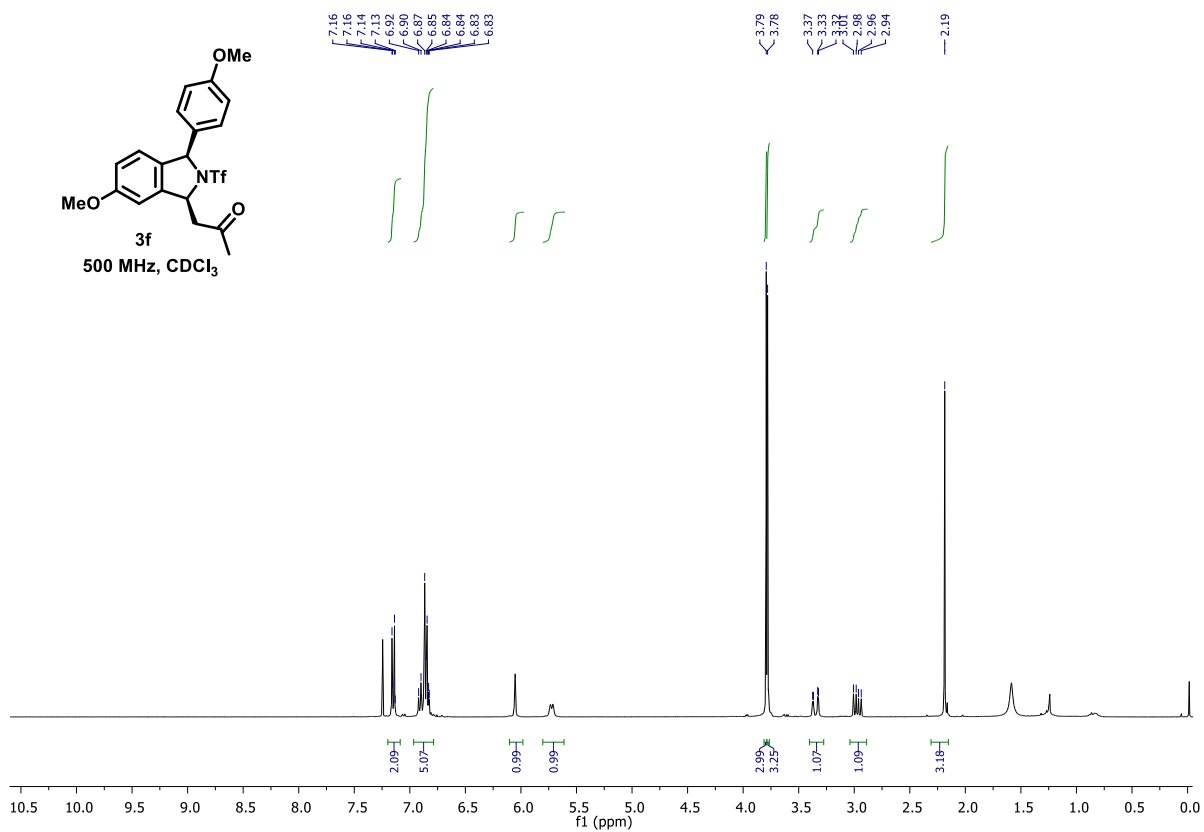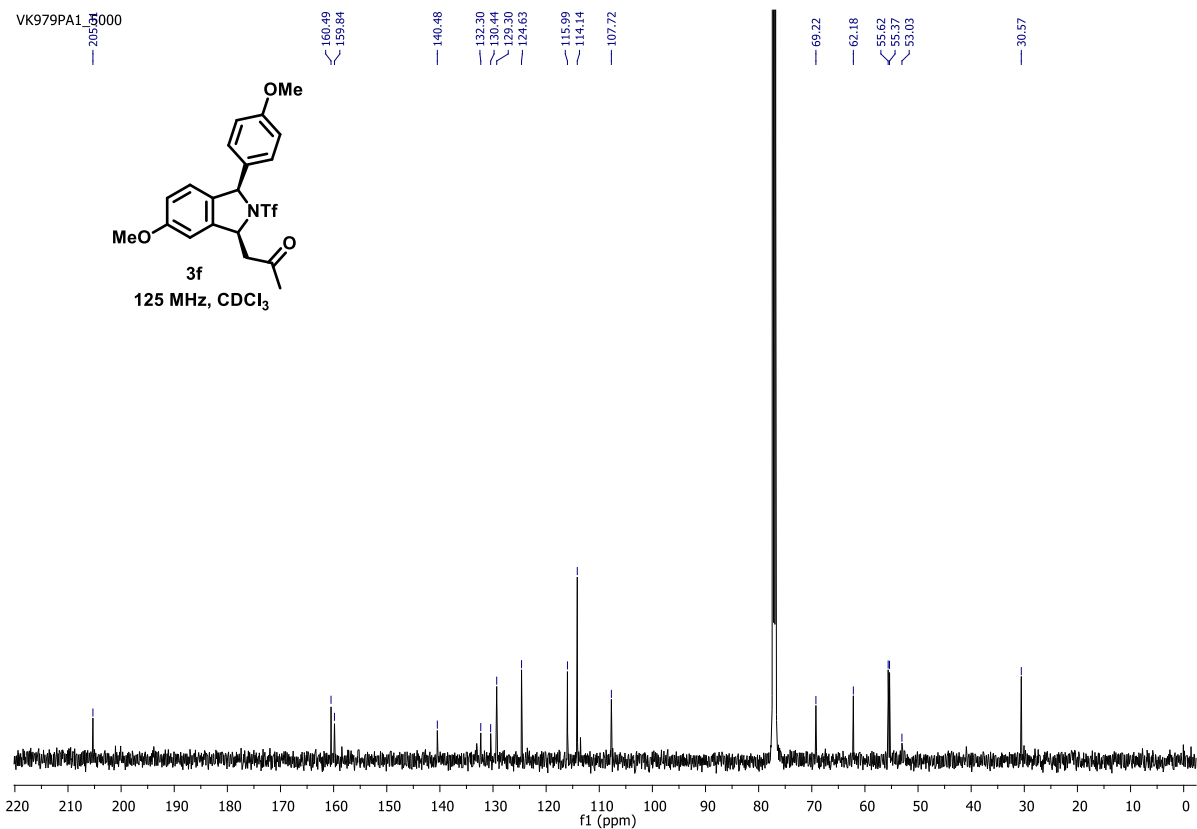



S#455465

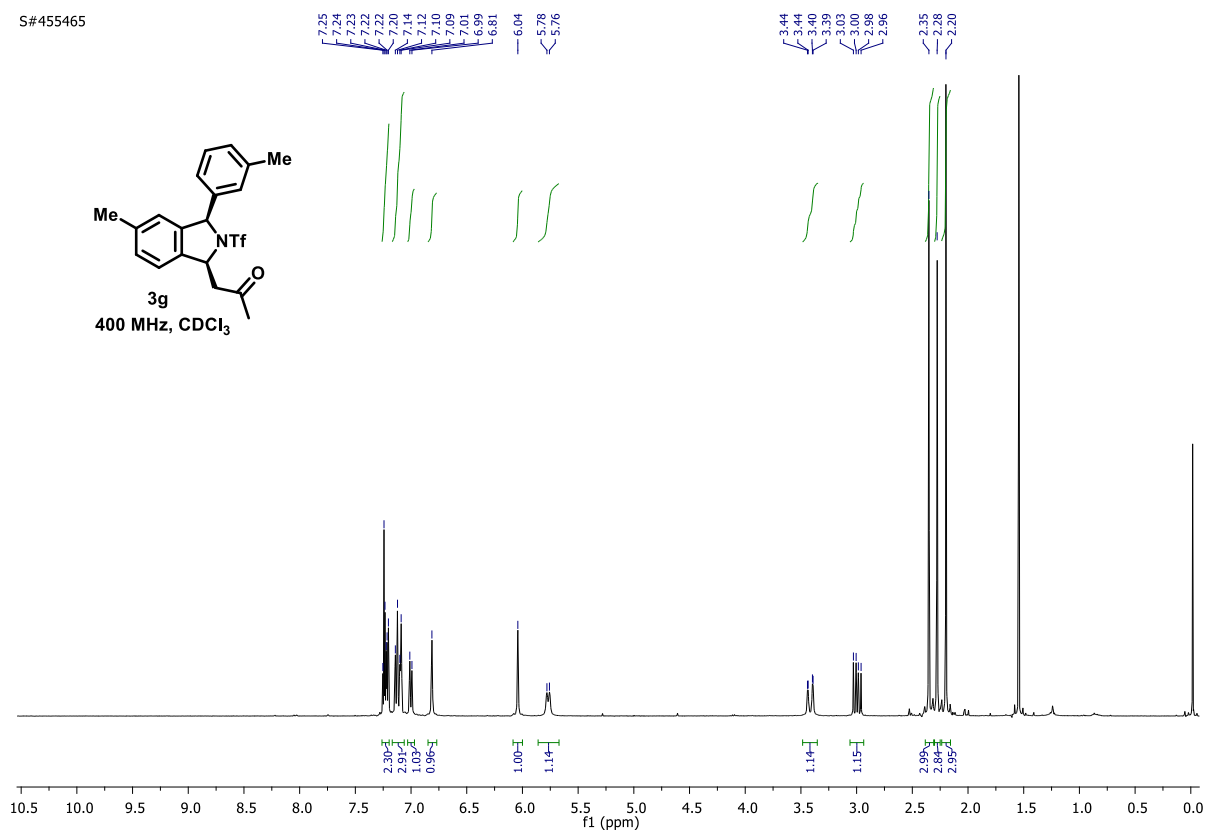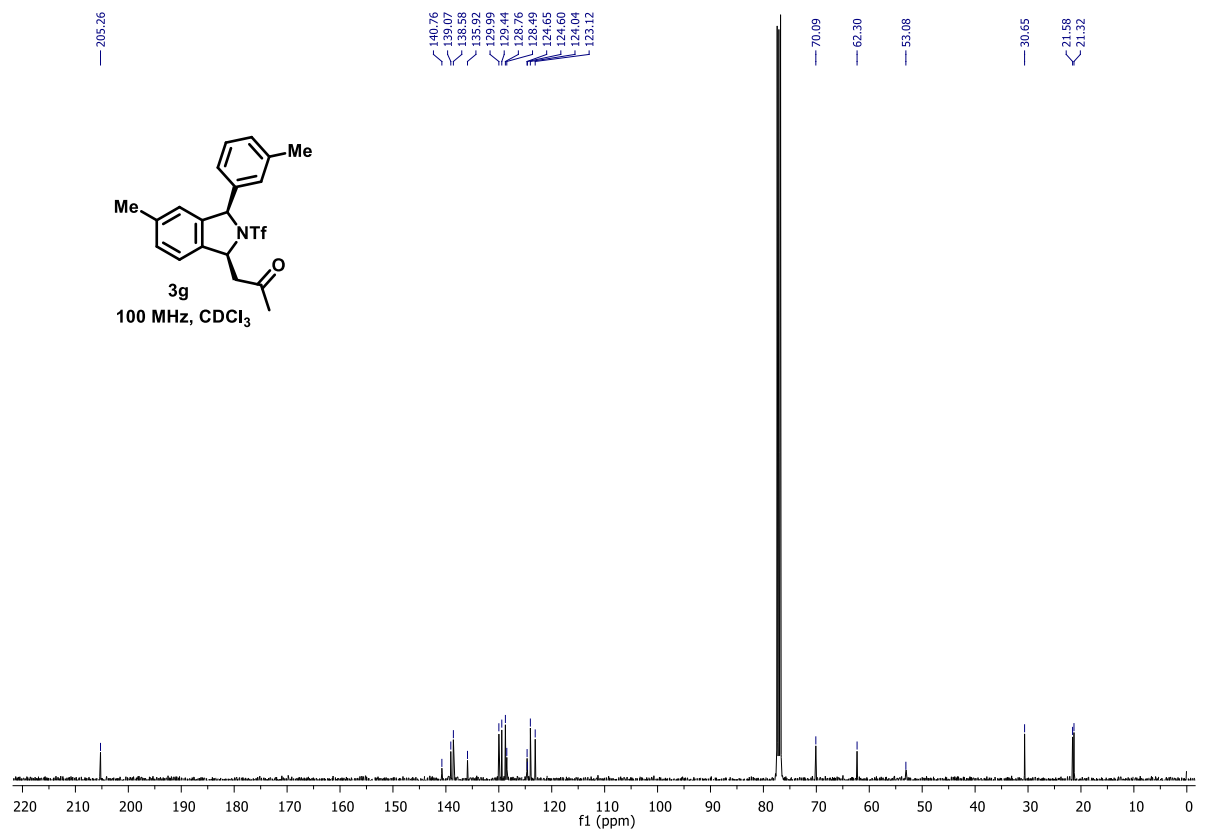

S#566191

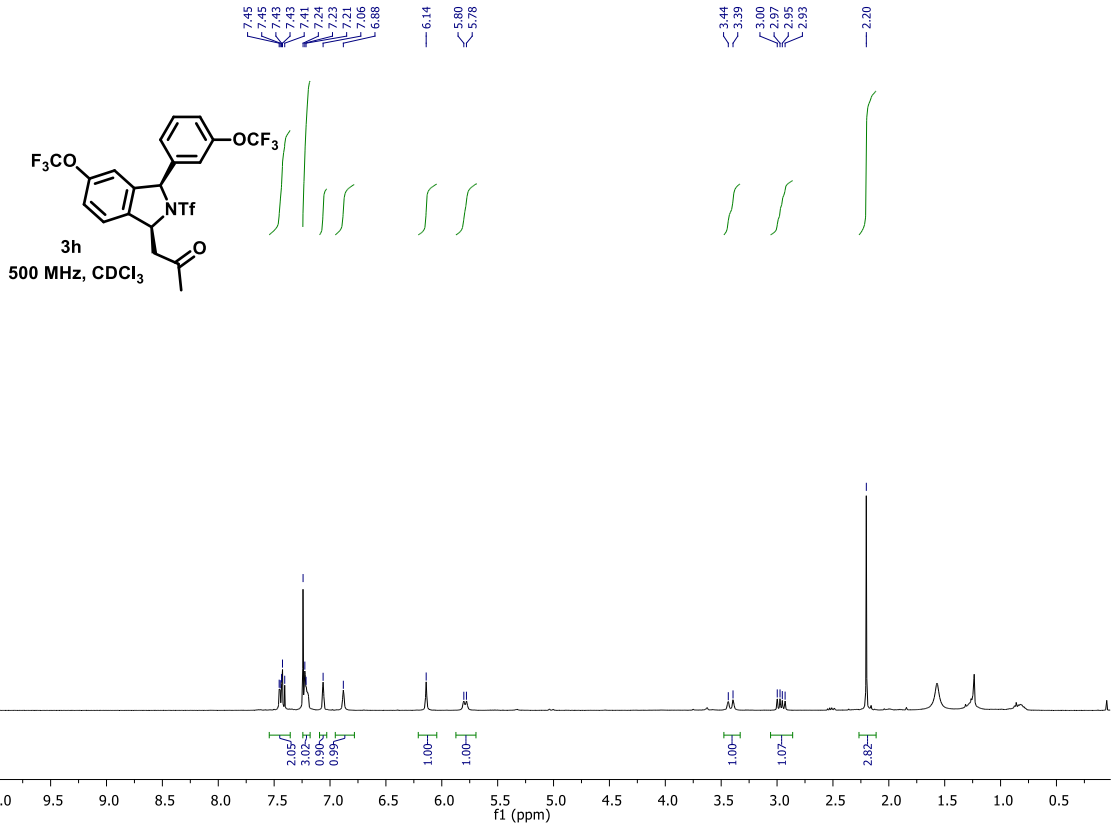

MMS1638G  
single pulse decoupled gated NOE

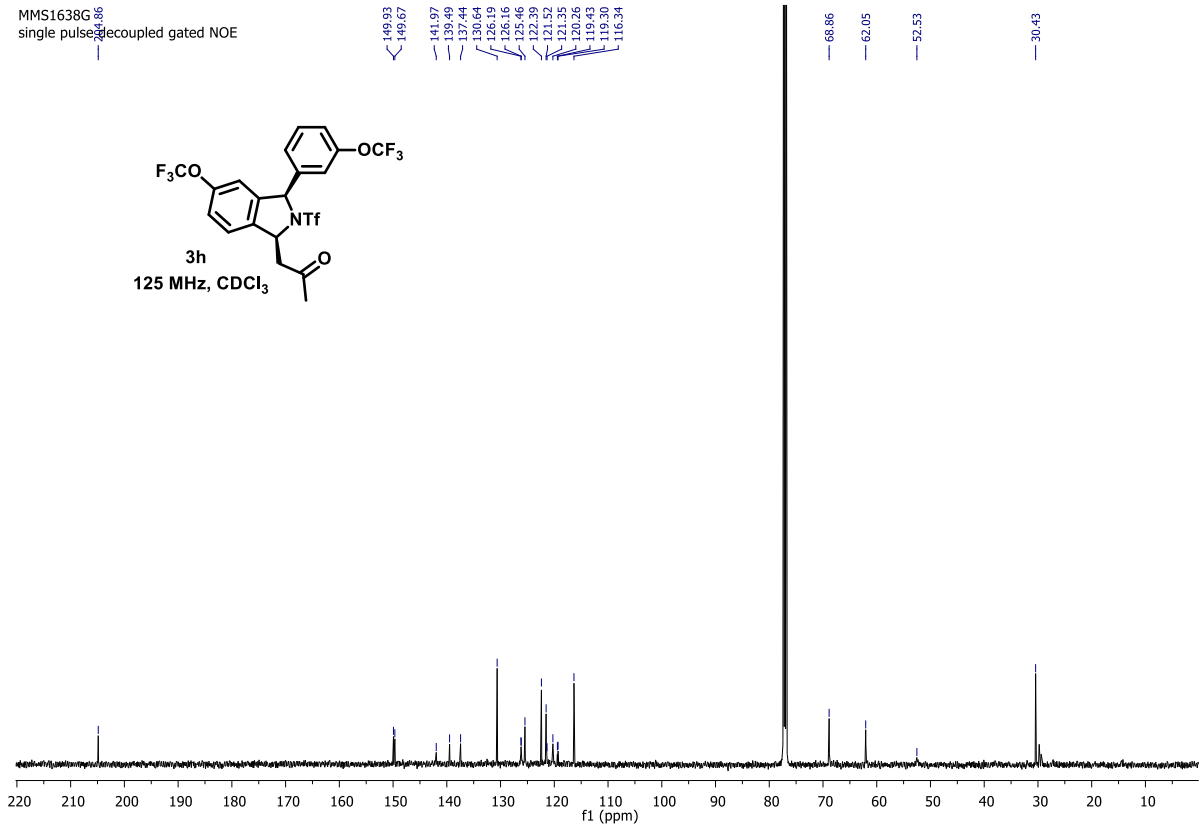

MMS1521

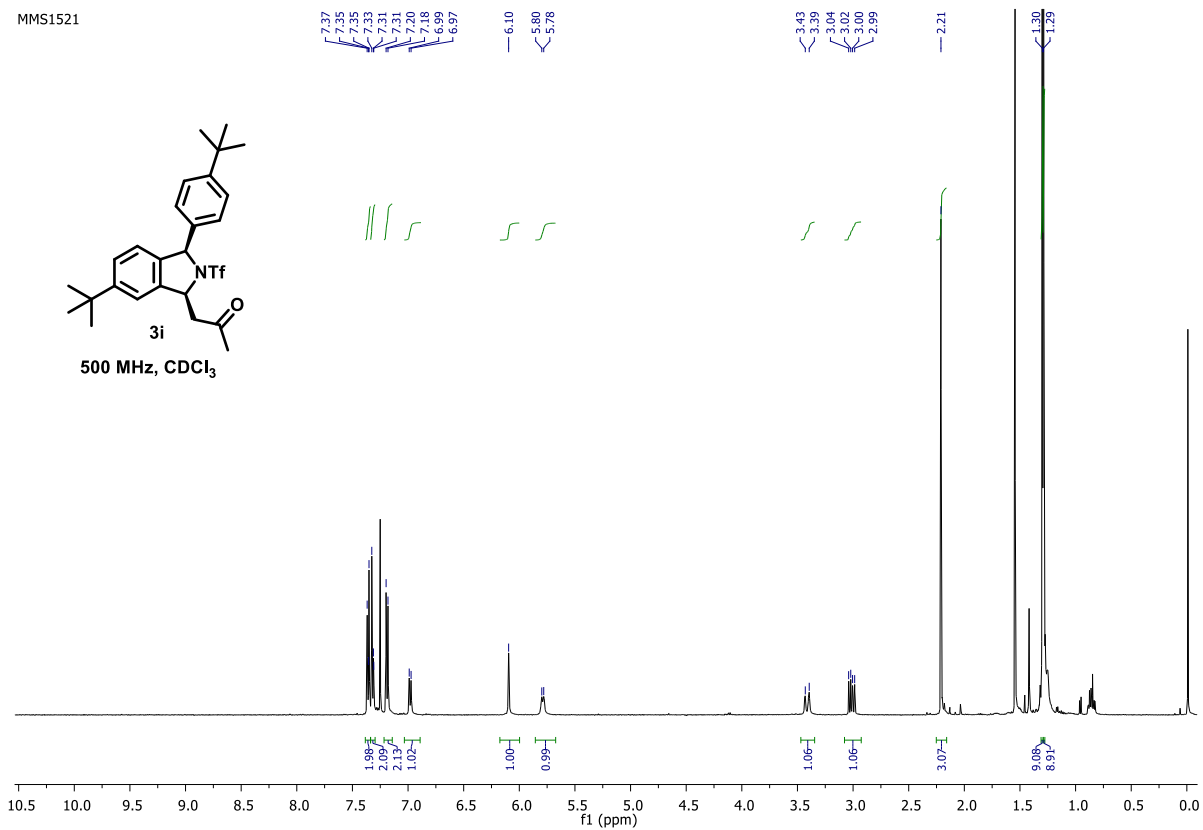

MMS1521

single pulse decoupled gated NOE

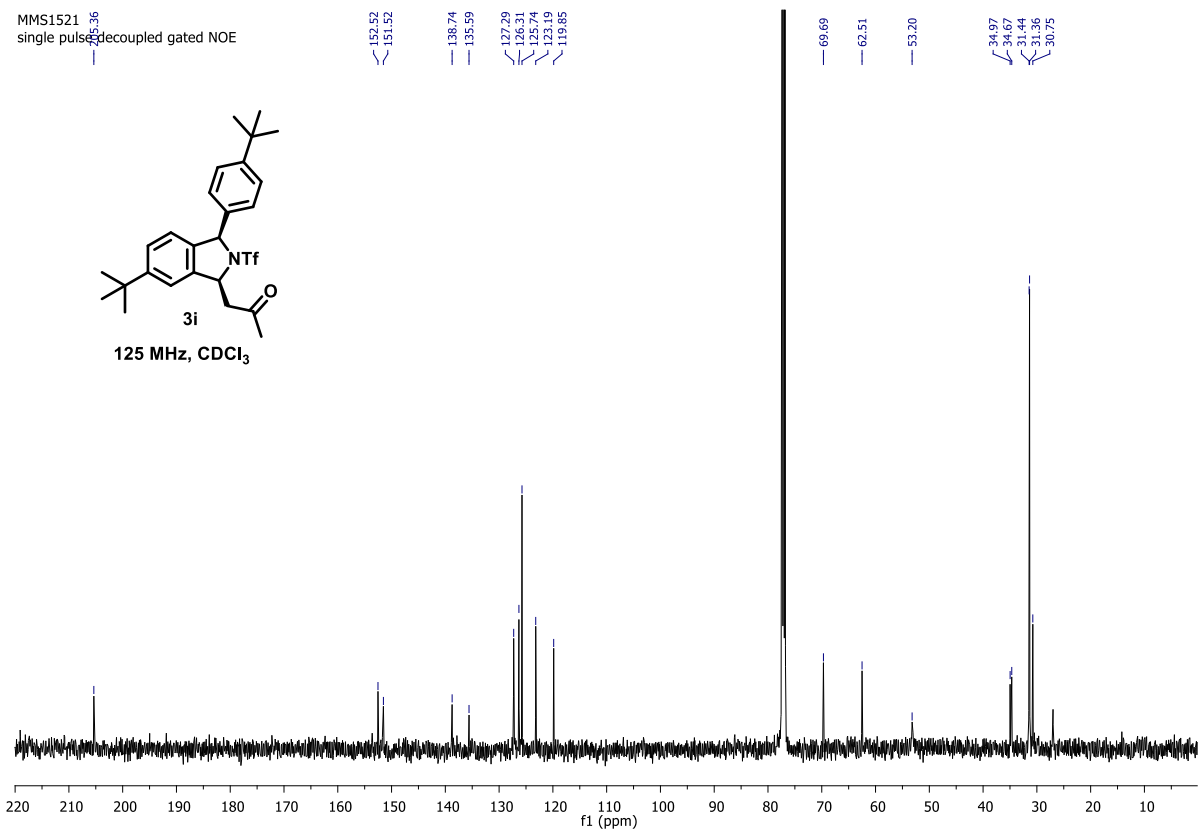

VK1191  
single\_pulse

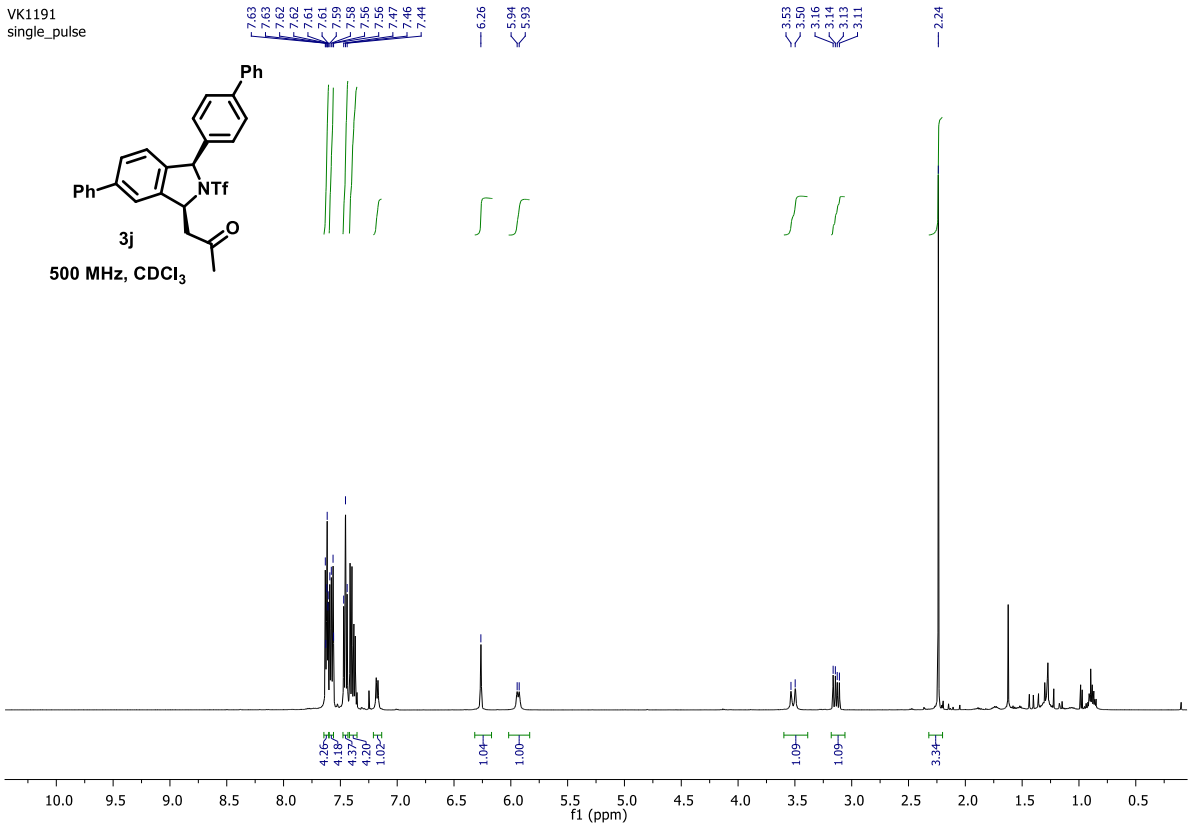

VK1191

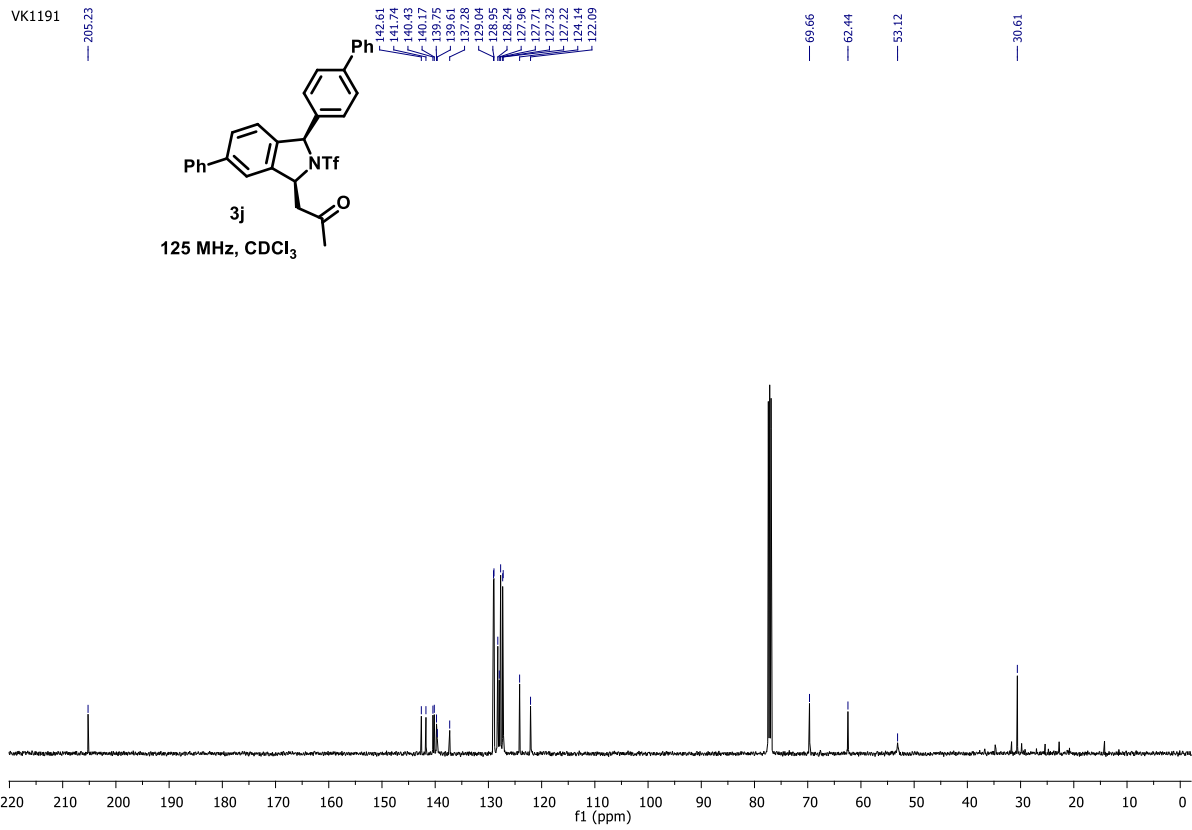

S#373271

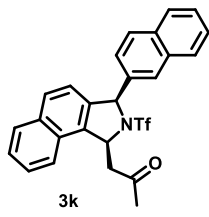

400 MHz, CDCl<sub>3</sub>

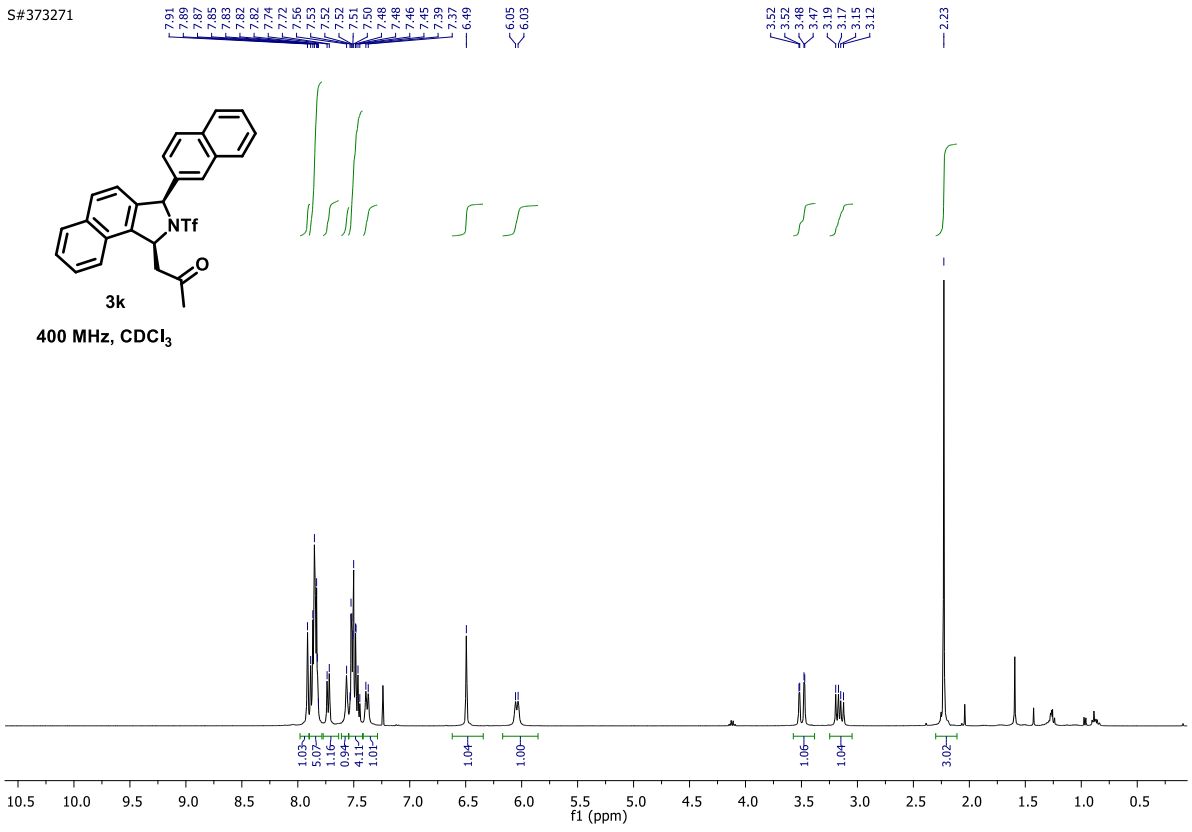

S#707266

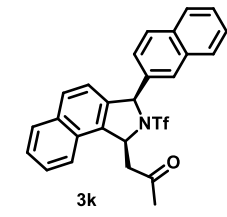

100 MHz, CDCl<sub>3</sub>

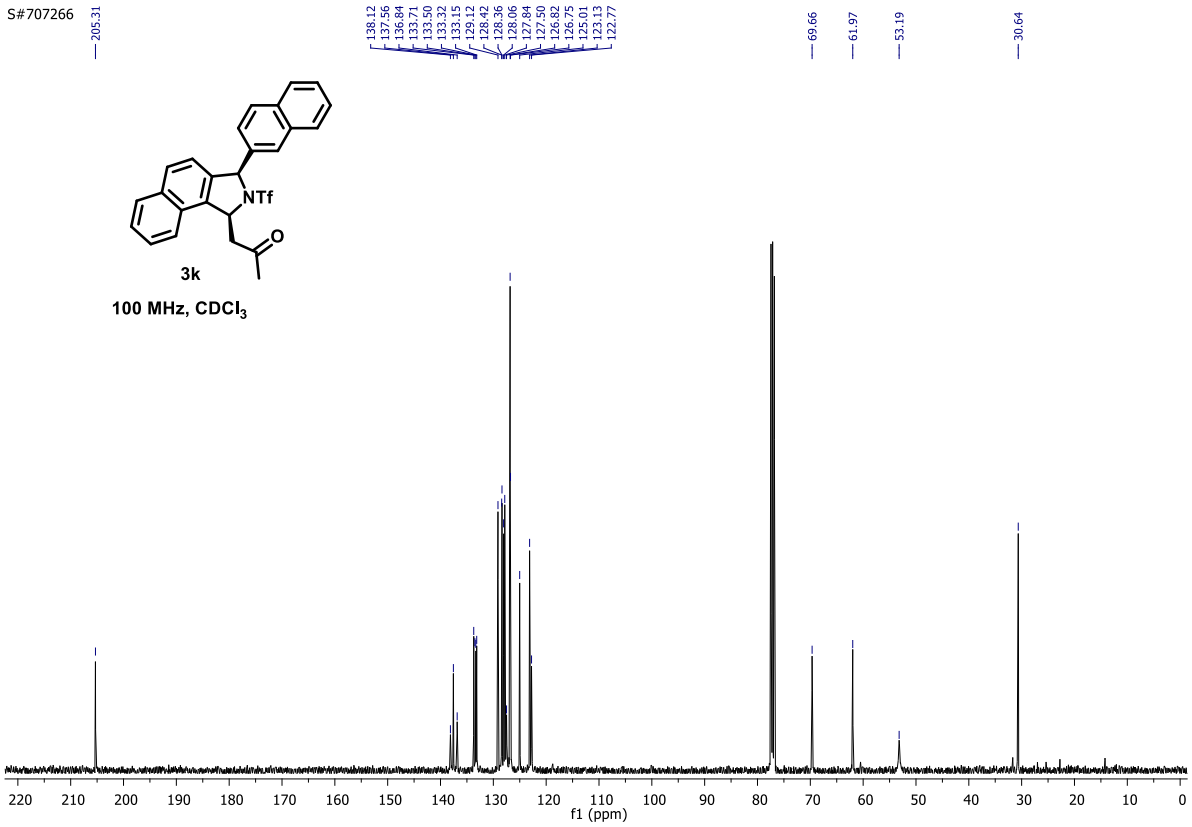

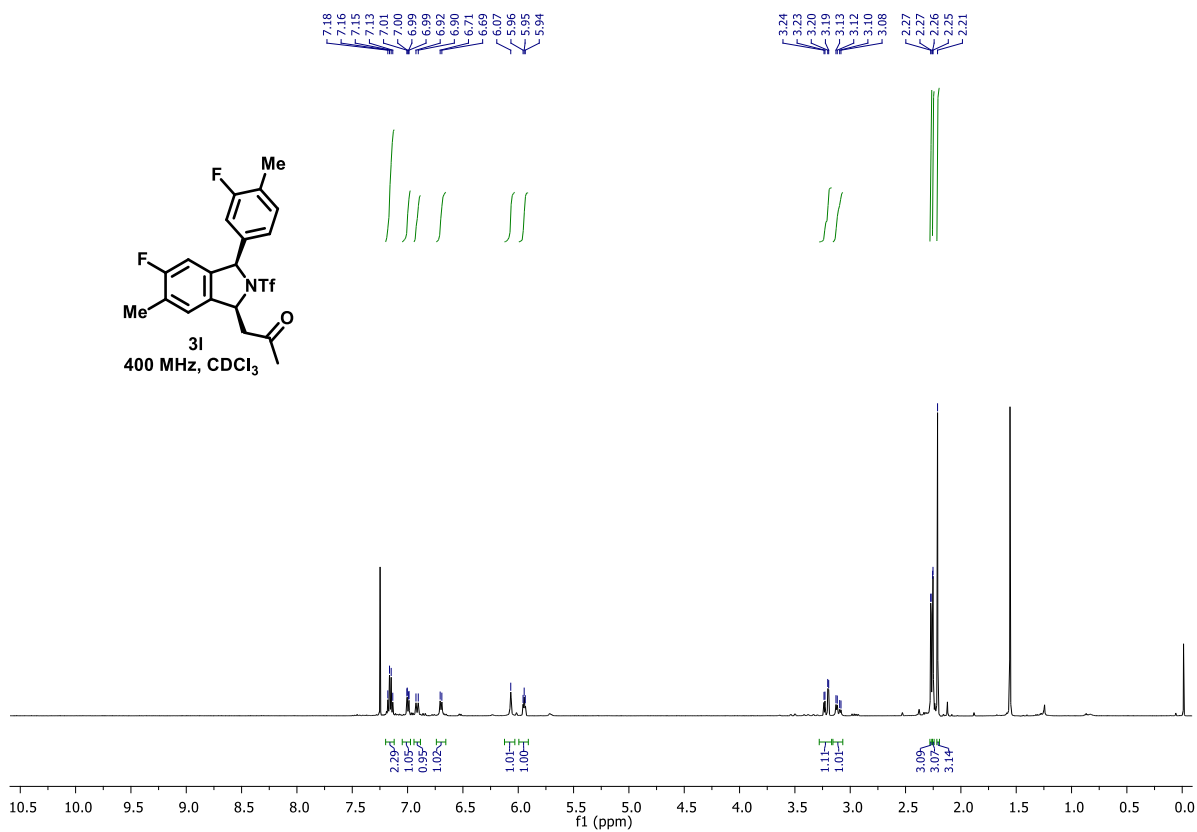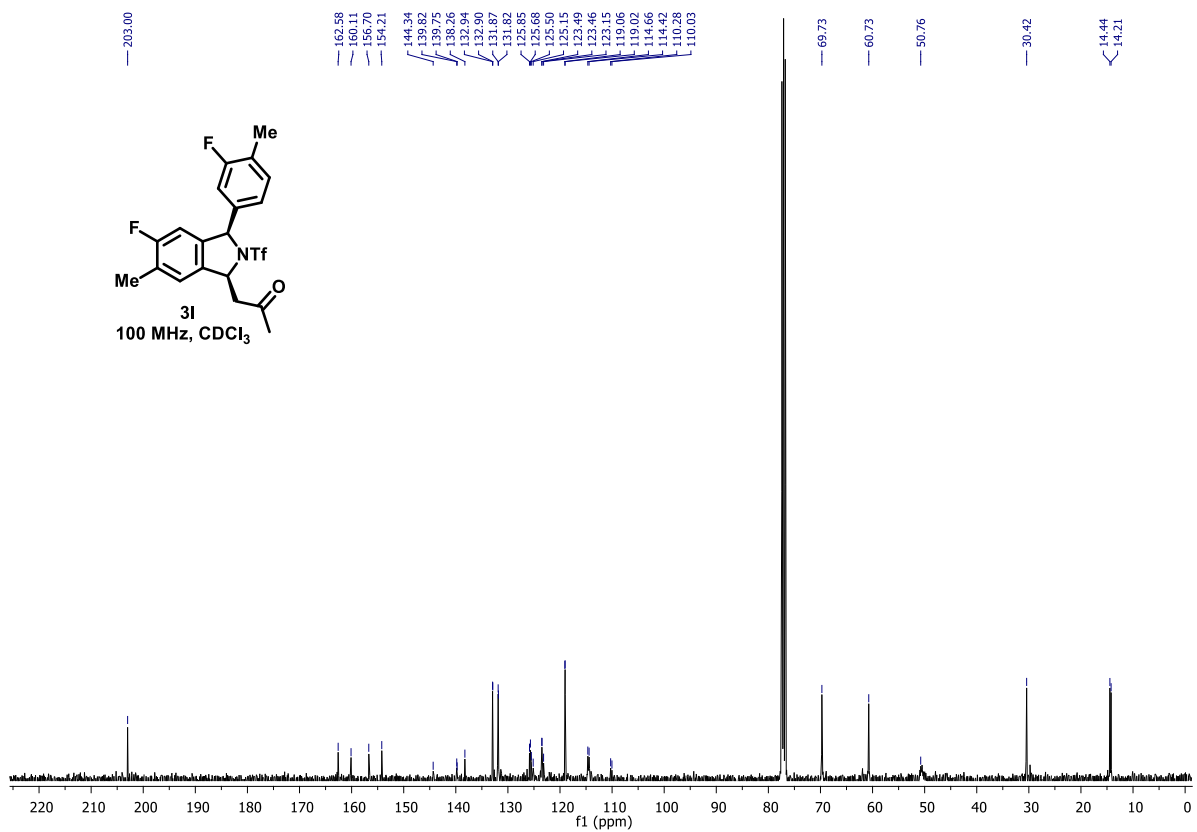

VK1237PA  
single\_pulse

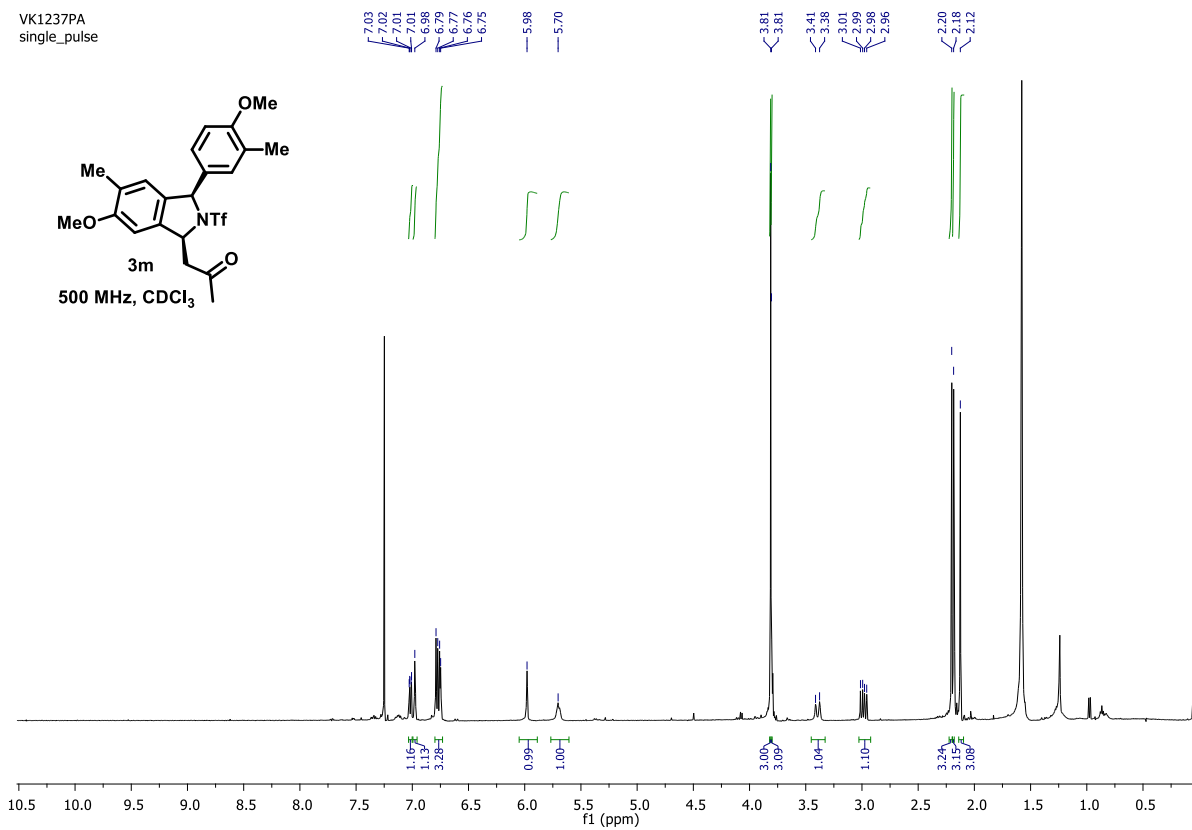

S#824431  
205.81

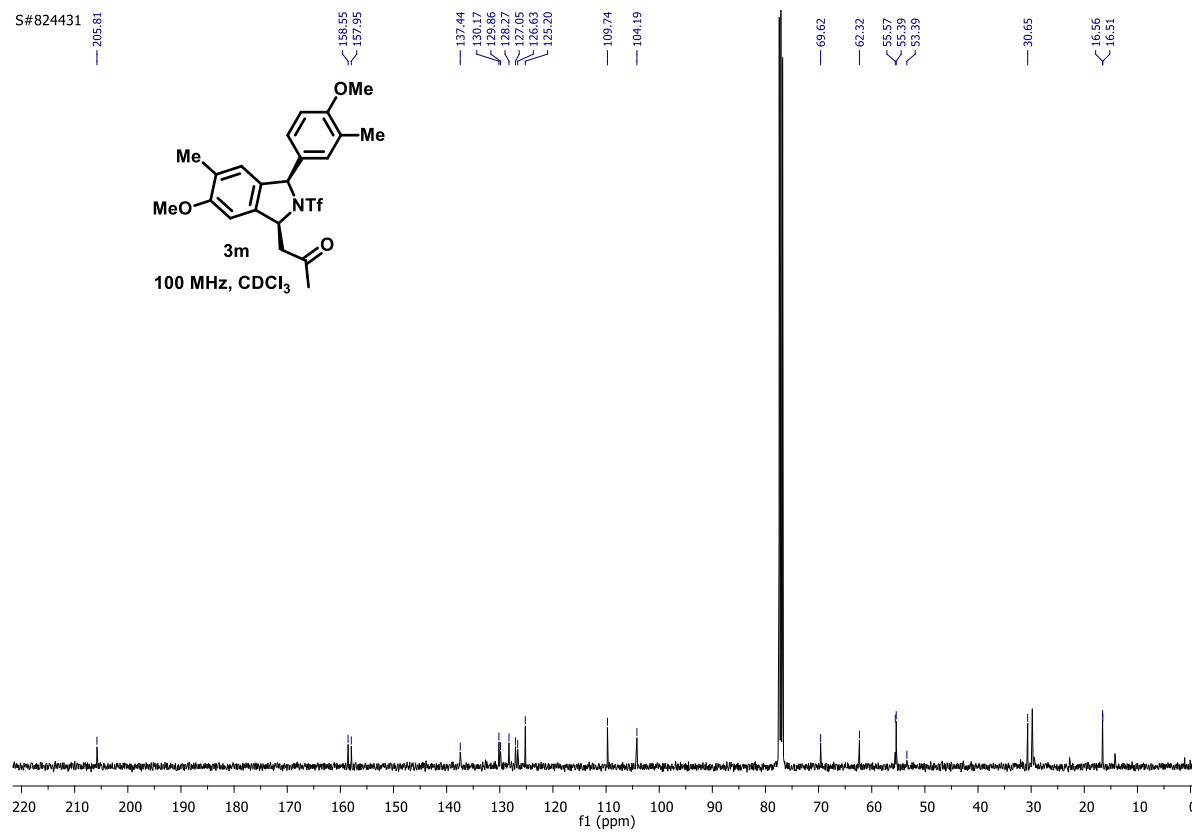

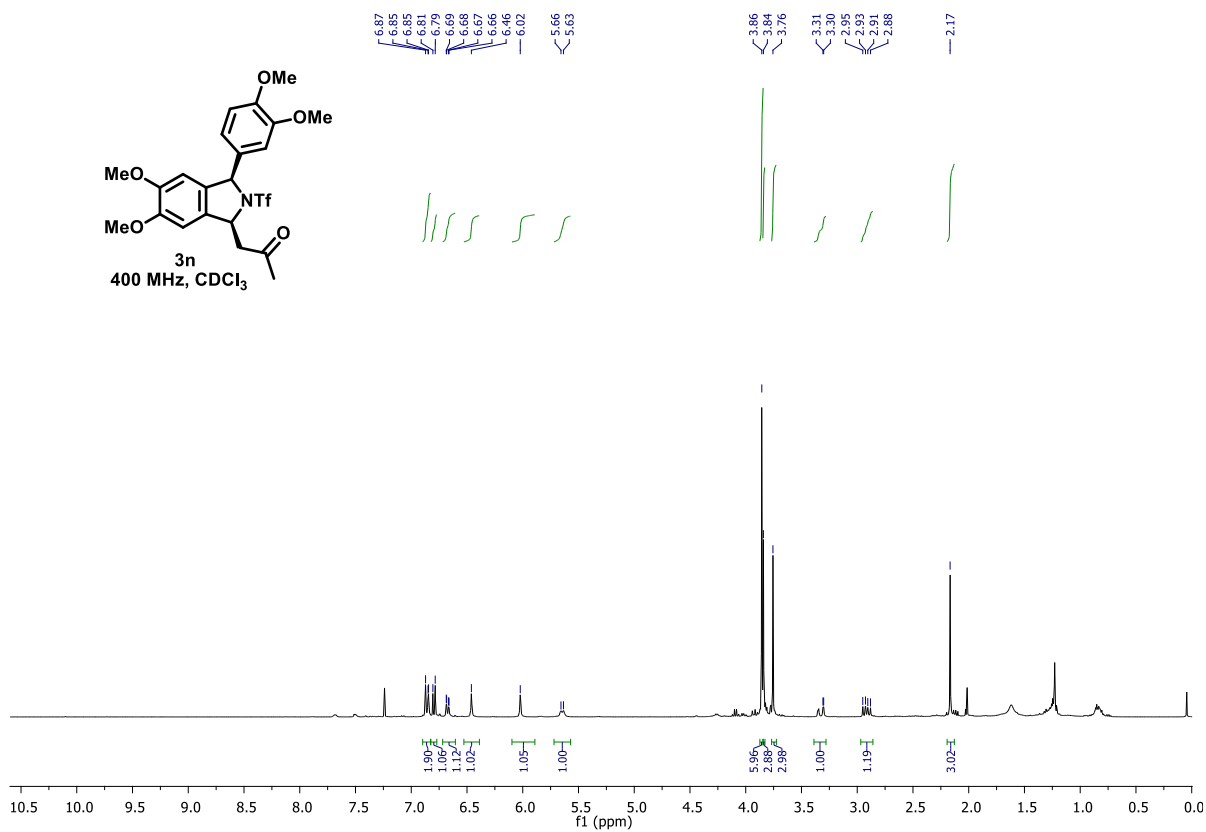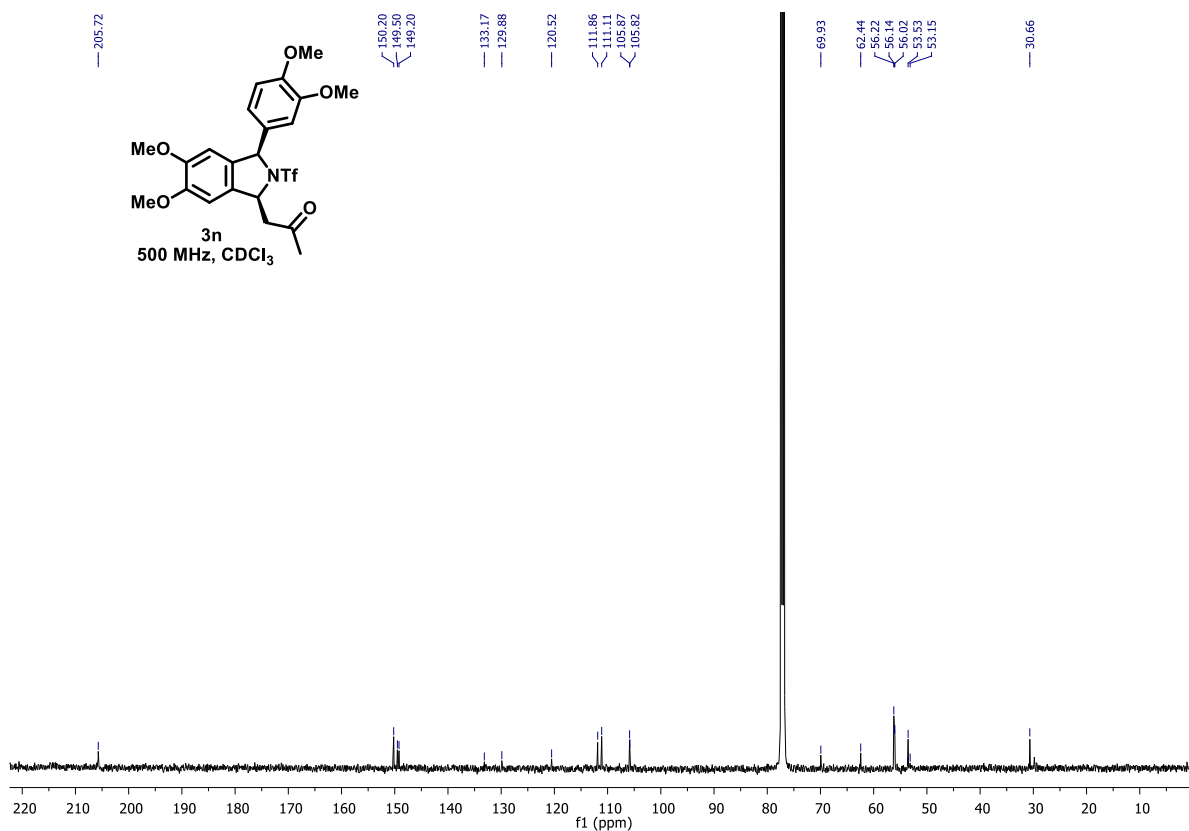



VK988  
single\_pulse

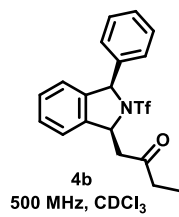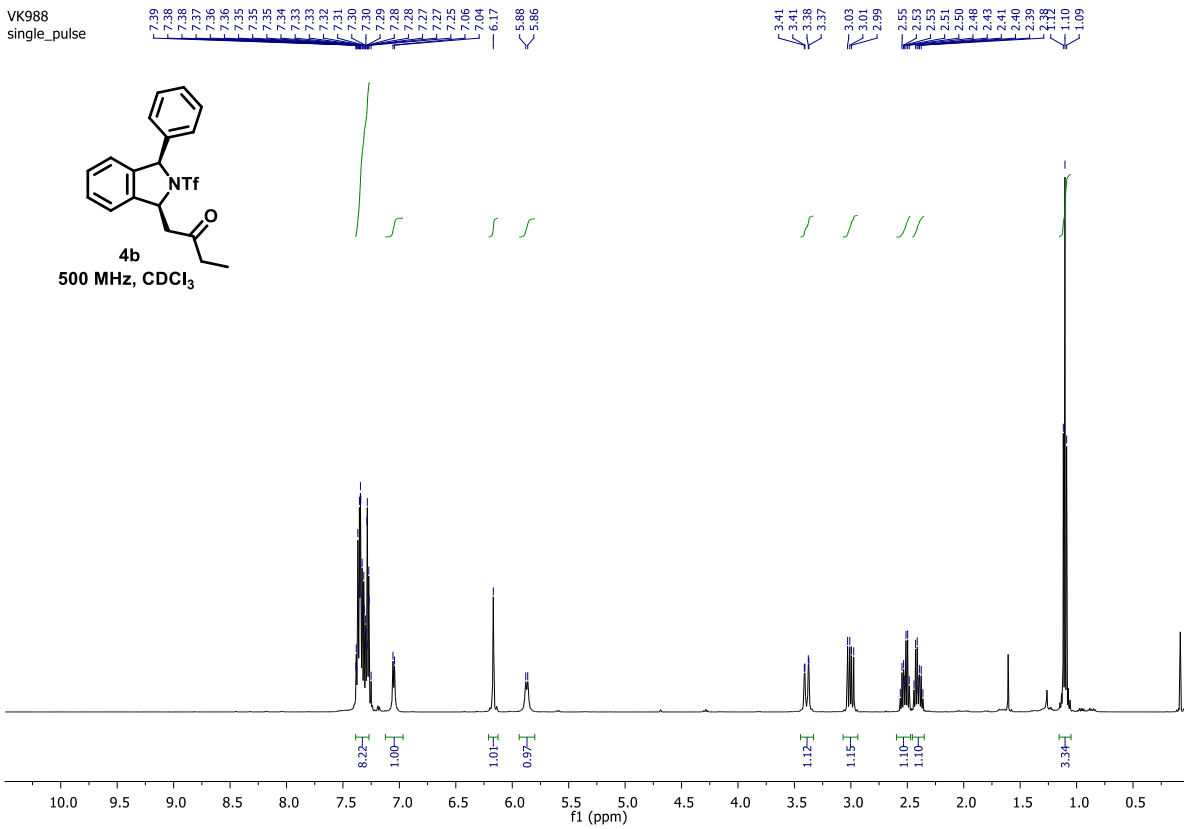

VK988  
single\_pulse decoupled gated NOE

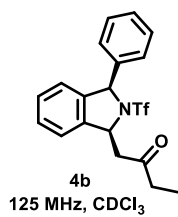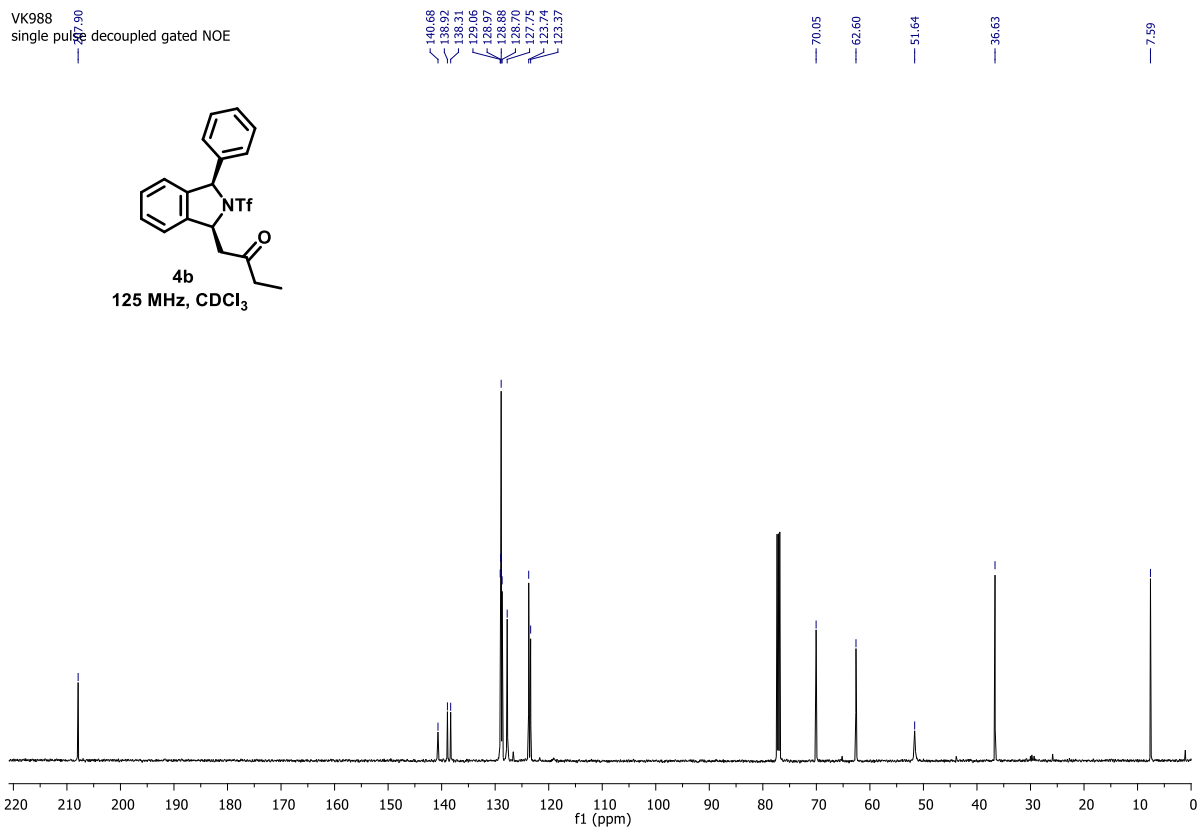

S#717908

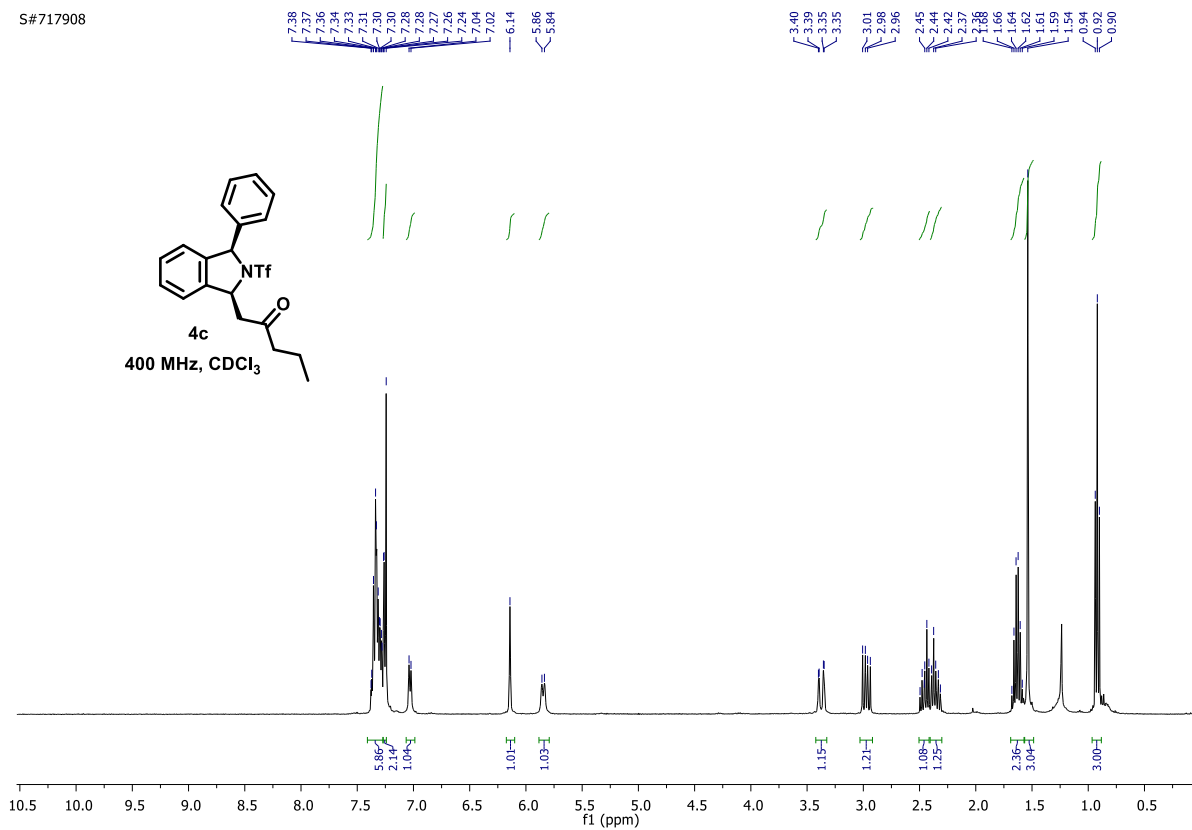

VK984PP  
single pulse decoupled gated NOE

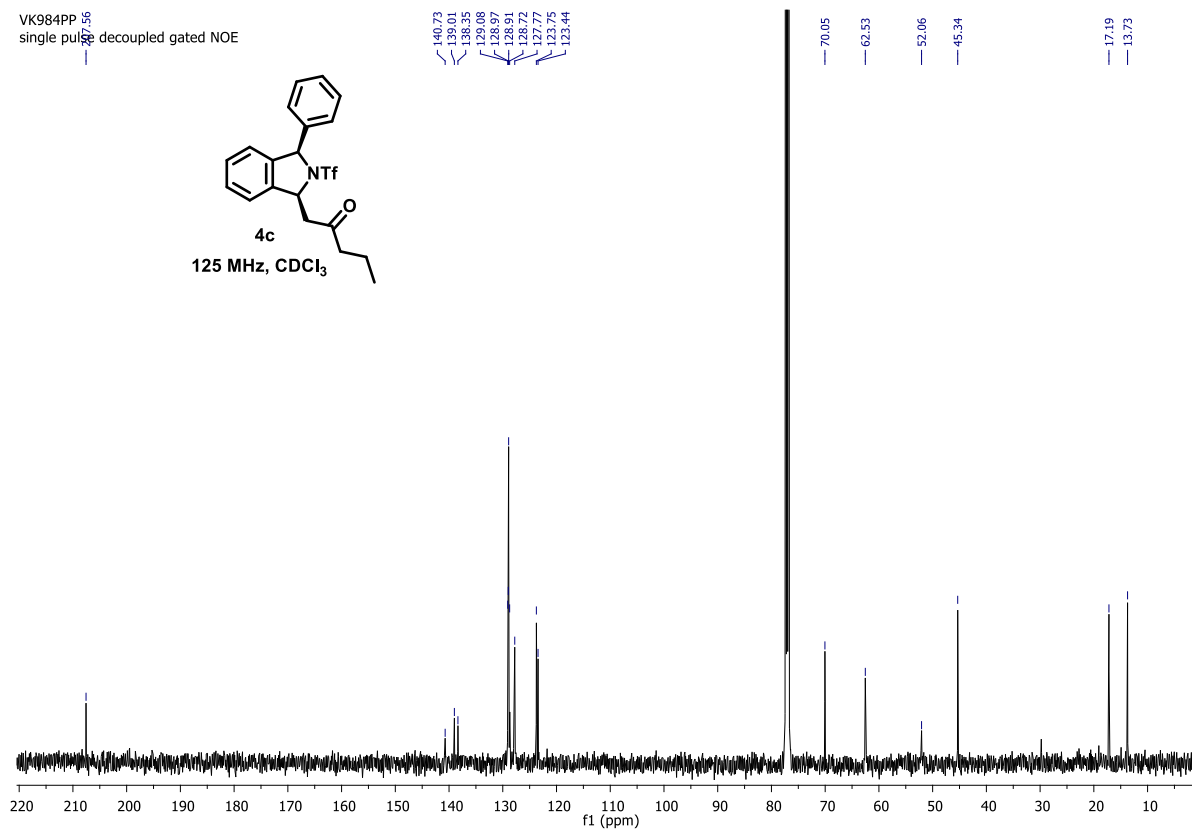

VK1208PR

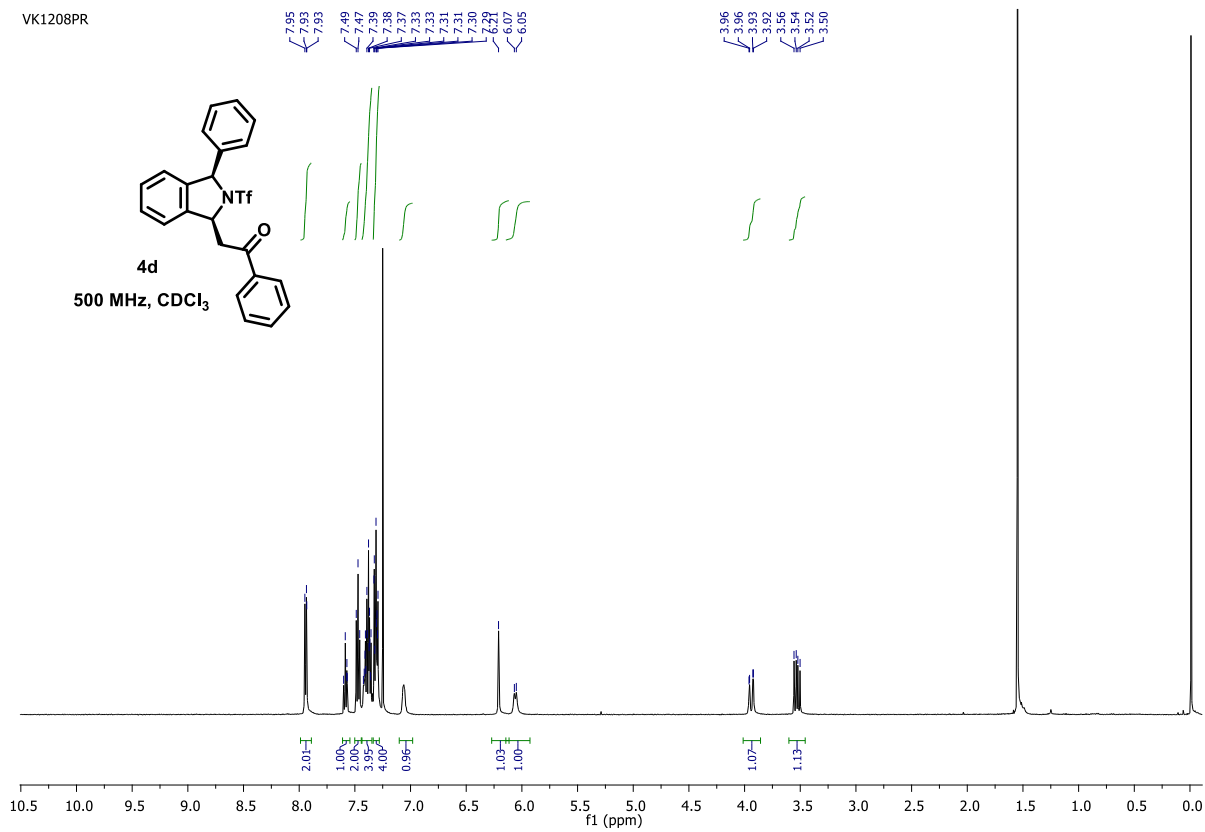

VK1208PP

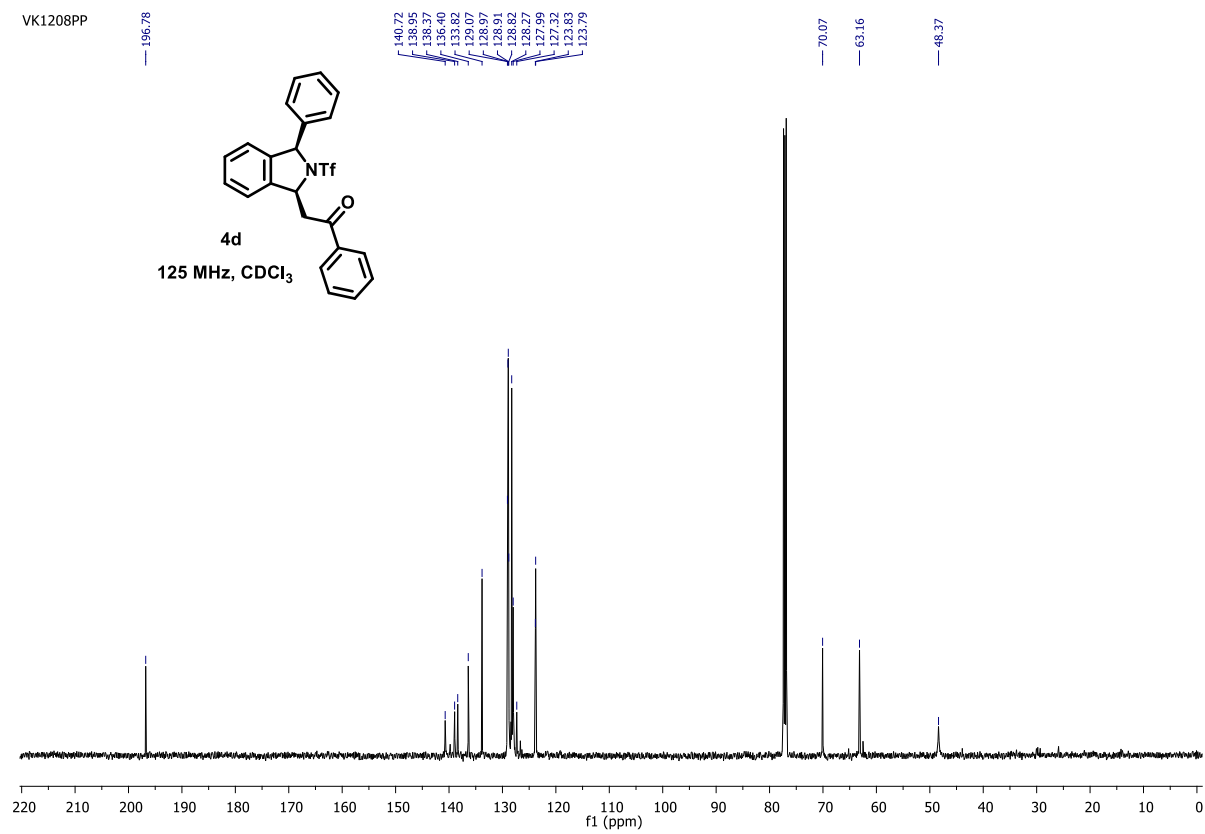

VK117PB

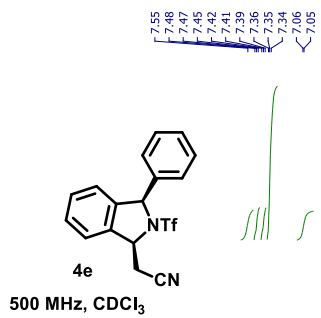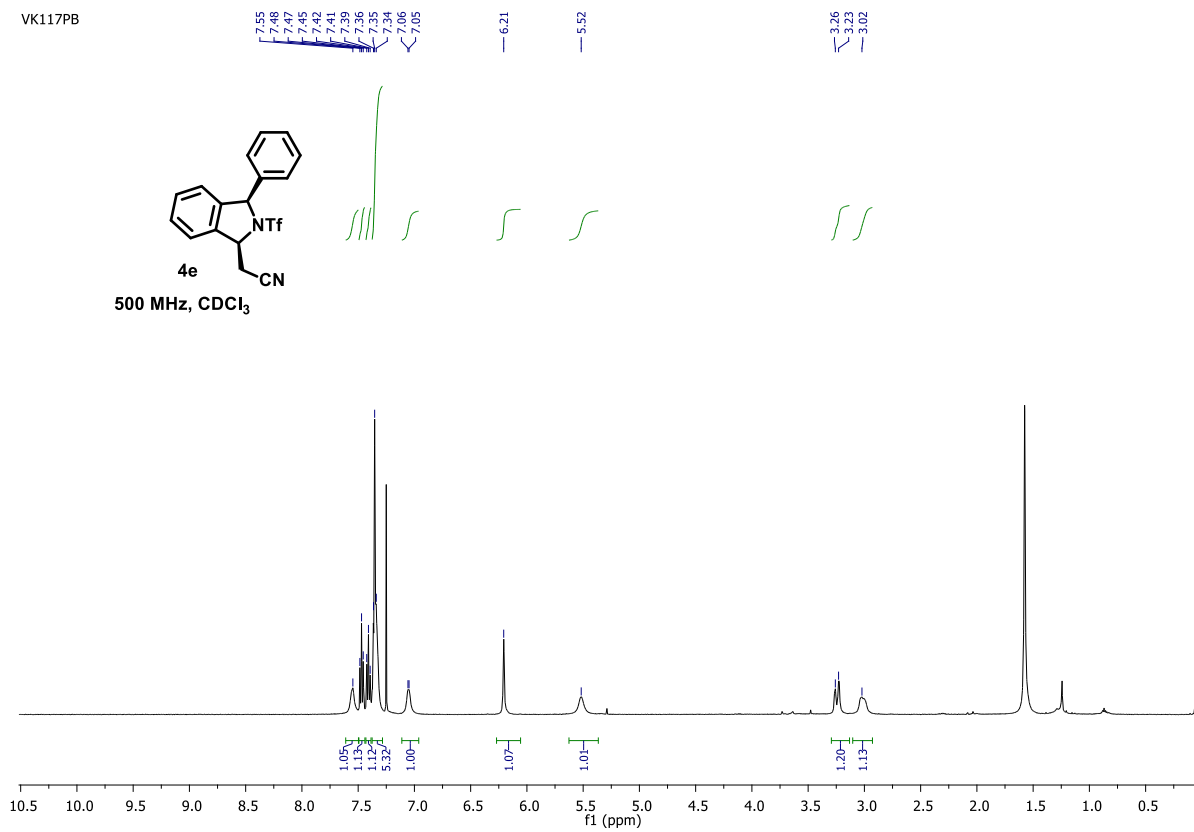

S#842176

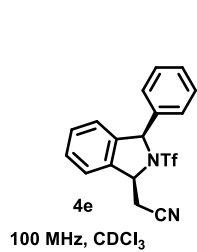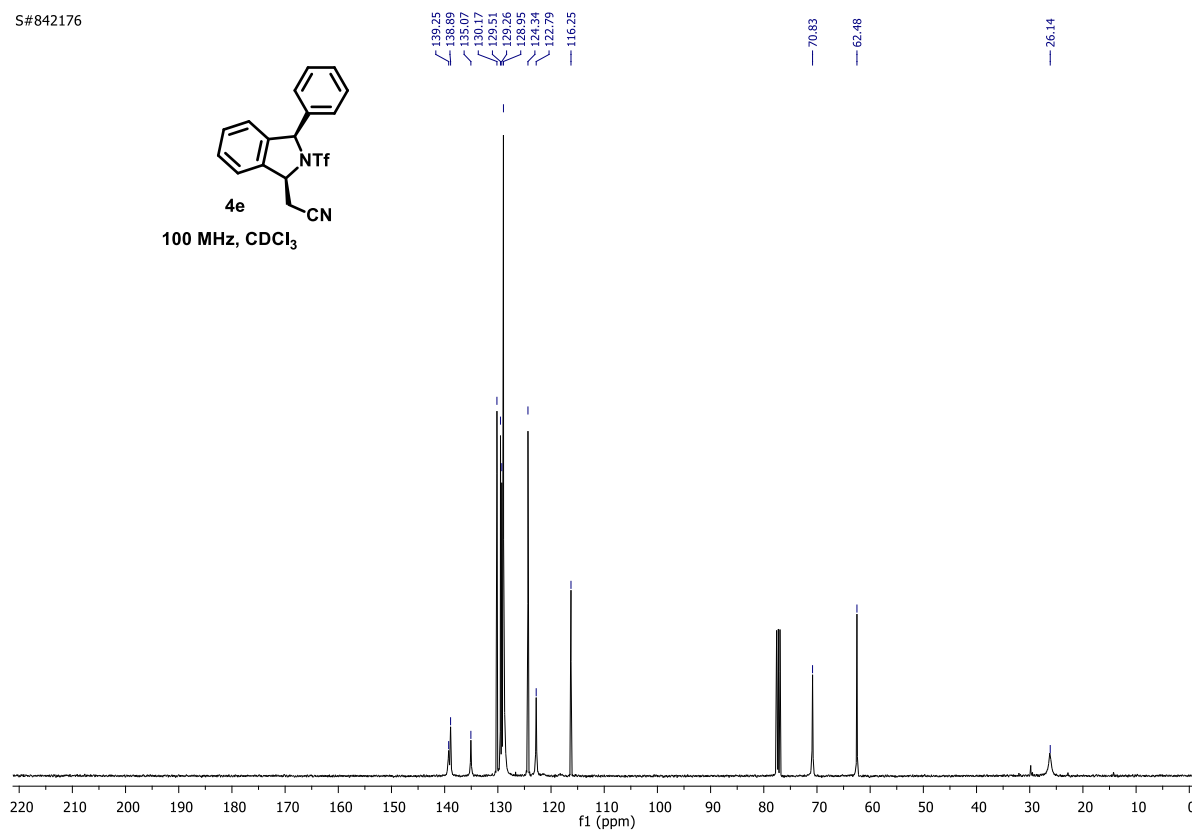

S#535337

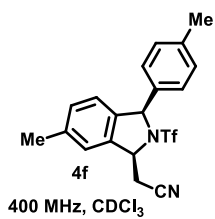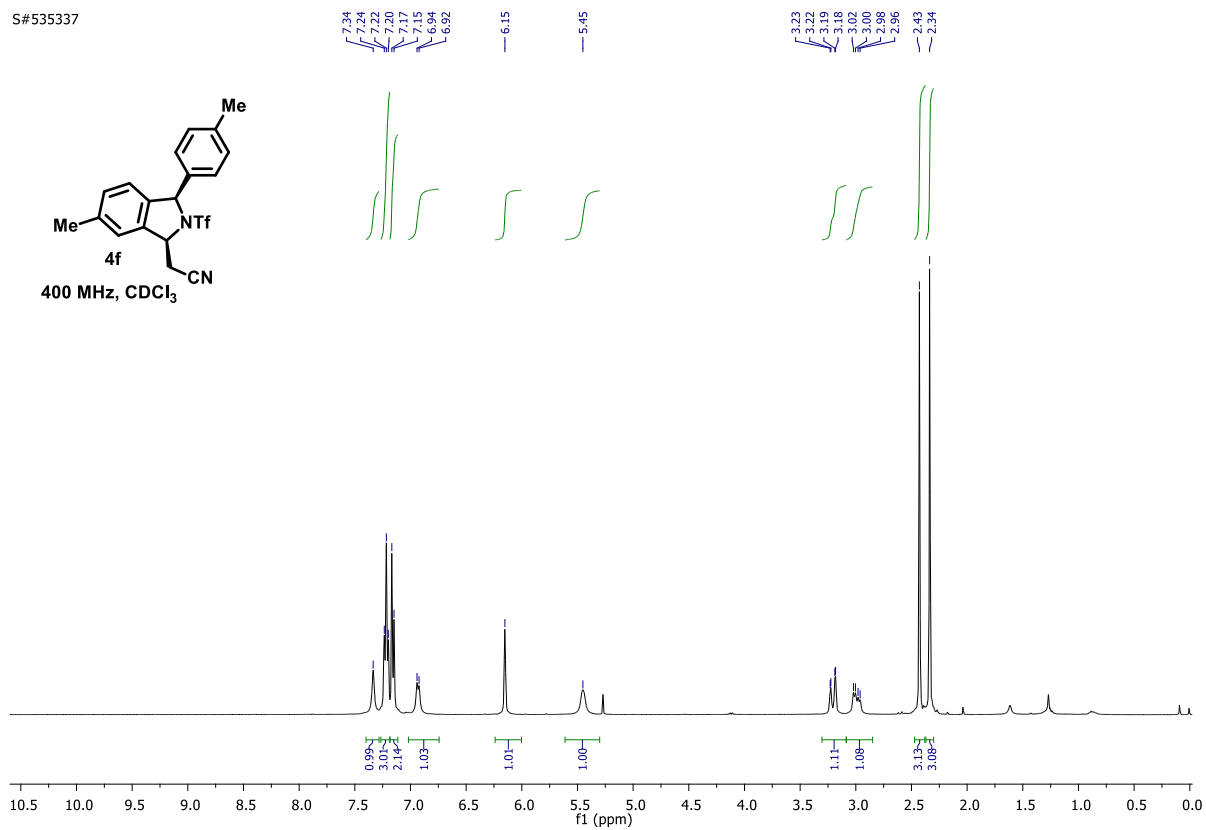

VK1455

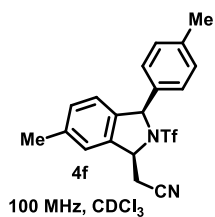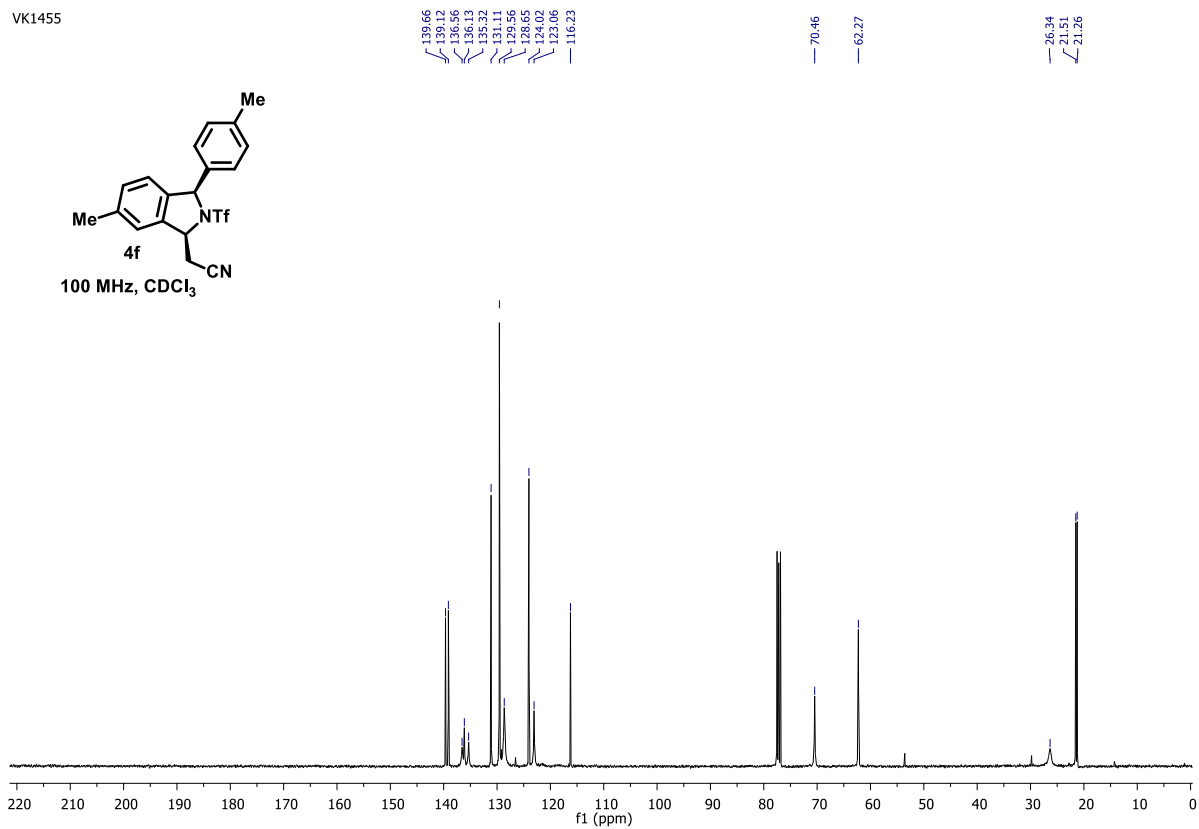

VK1459PR

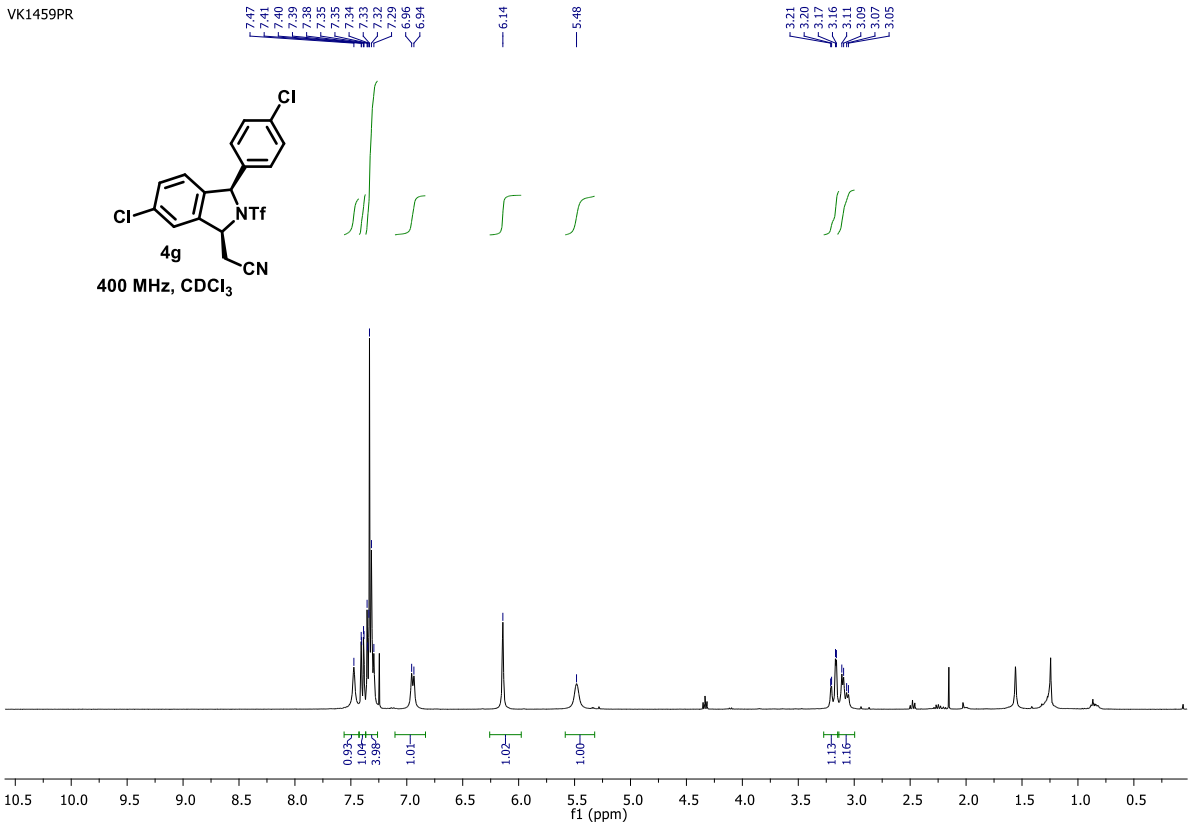

VK1459PR

single pulse decoupled gated NOE

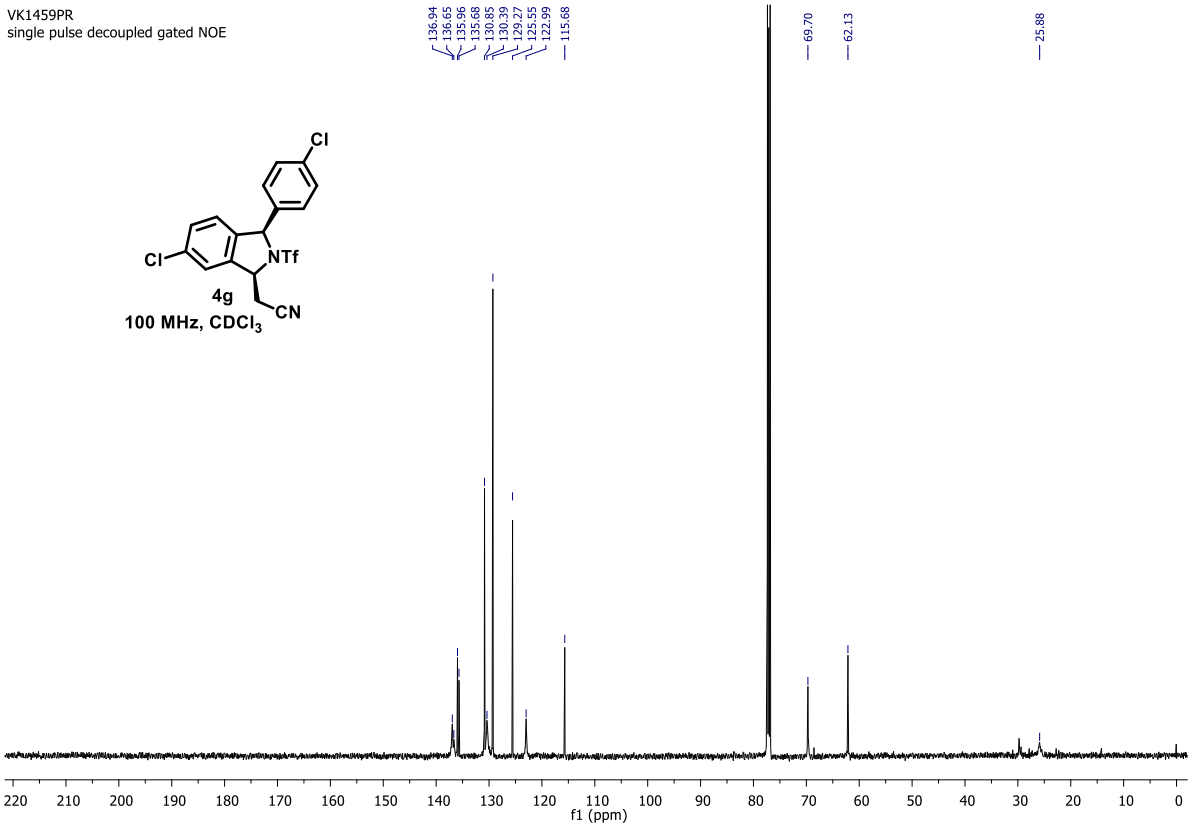

S#695641

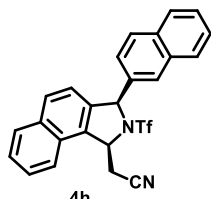

400 MHz, CDCl<sub>3</sub>

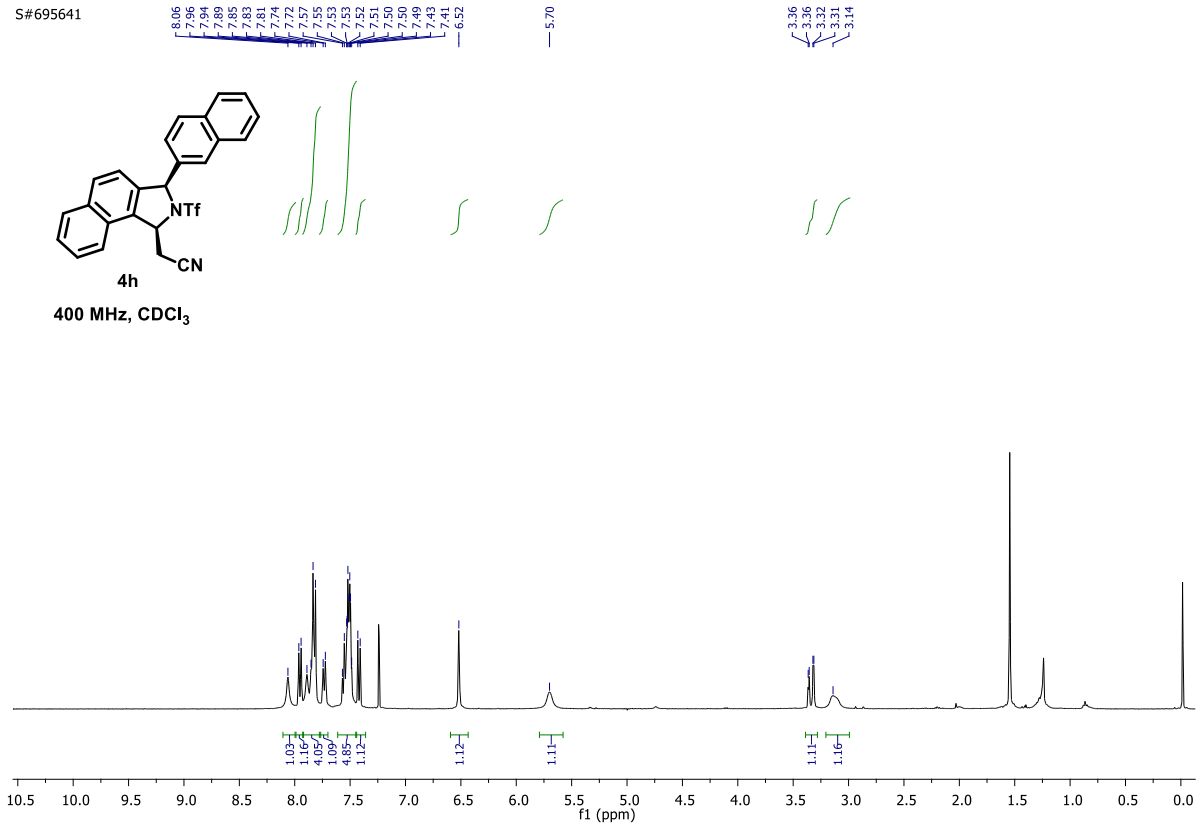

S#12026

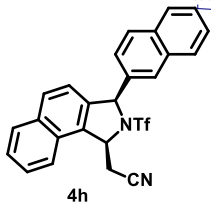

100 MHz, CDCl<sub>3</sub>

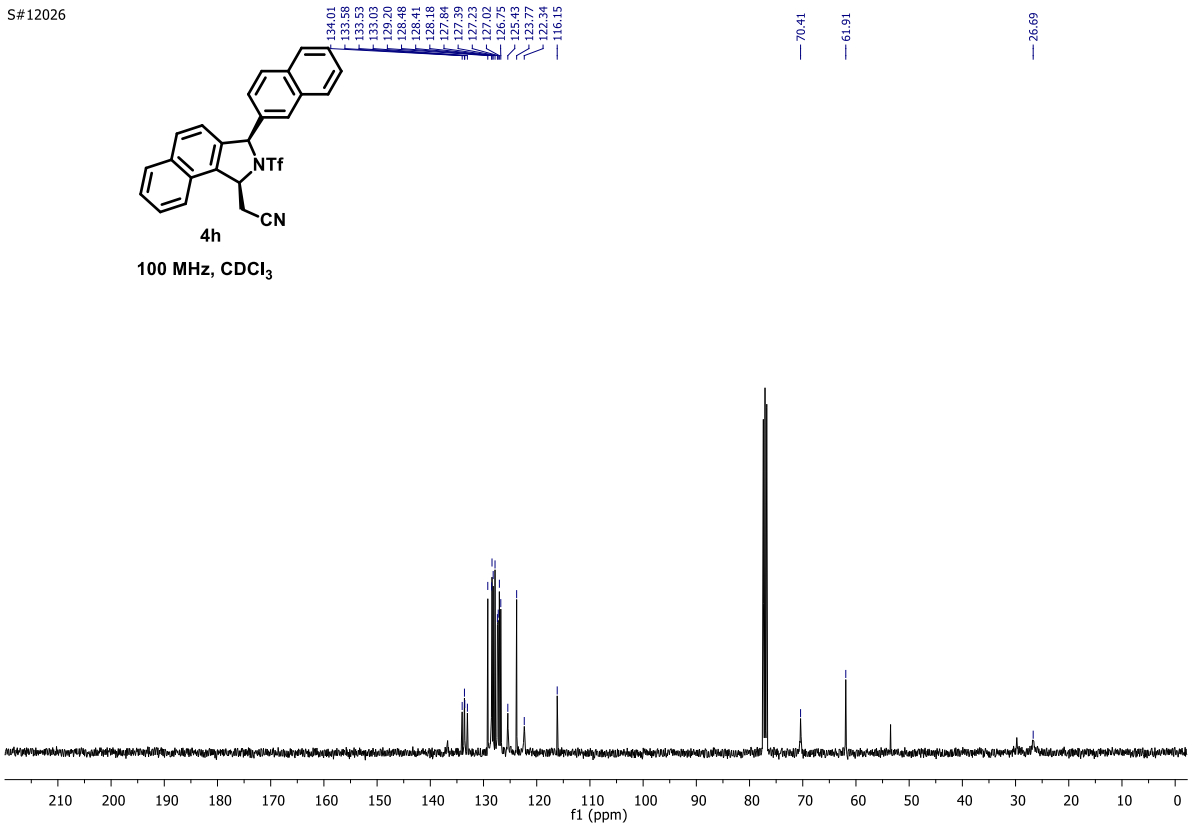

MMS1596A  
single\_pulse

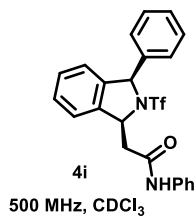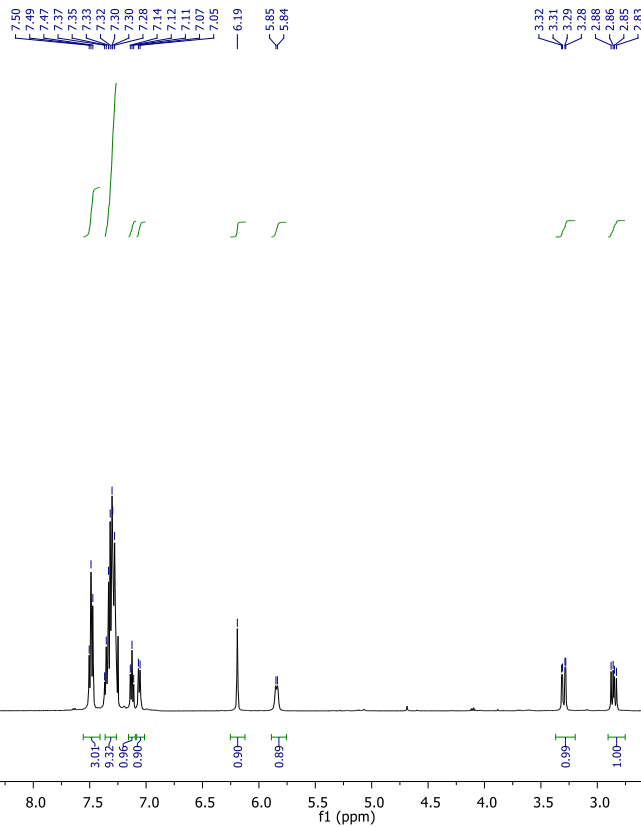

MMS1596 A  
single pulse decoupled gated NOE

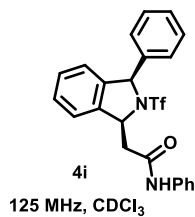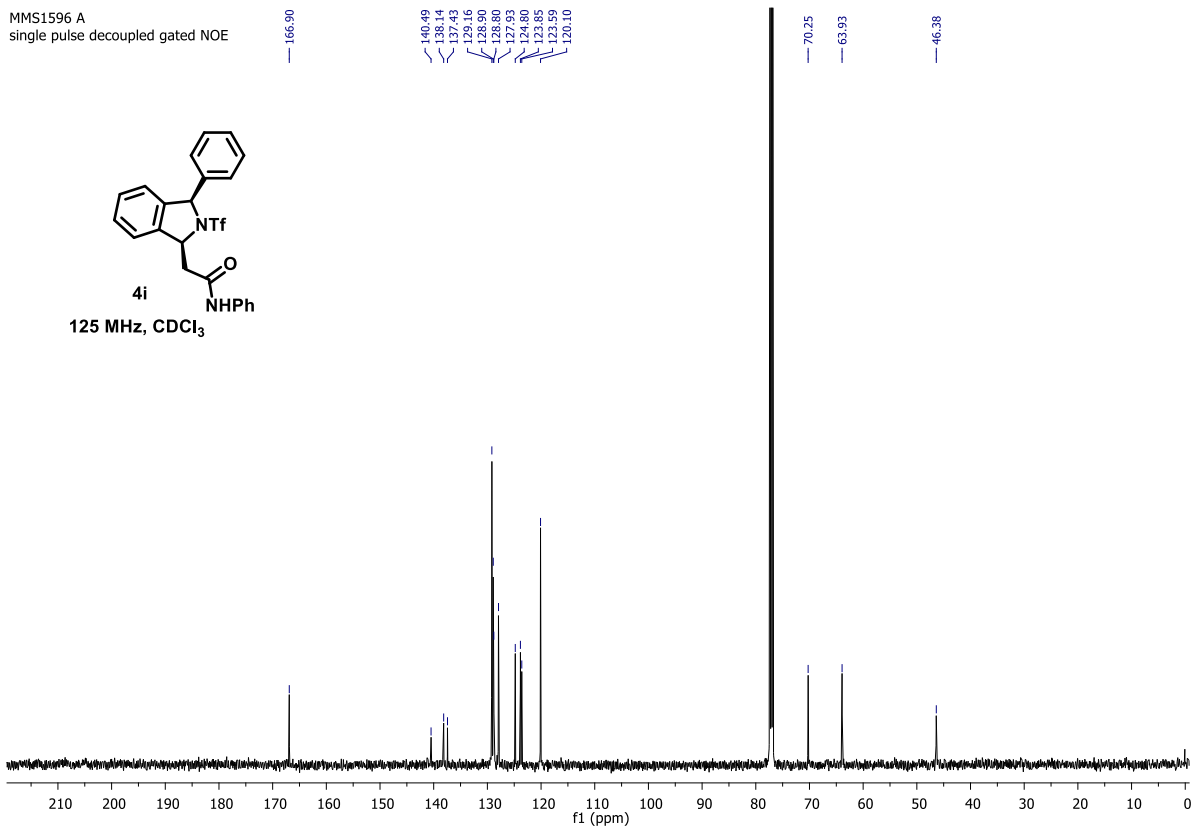



MMS1639D

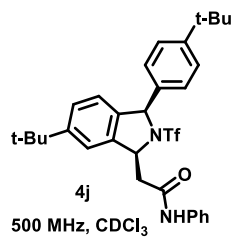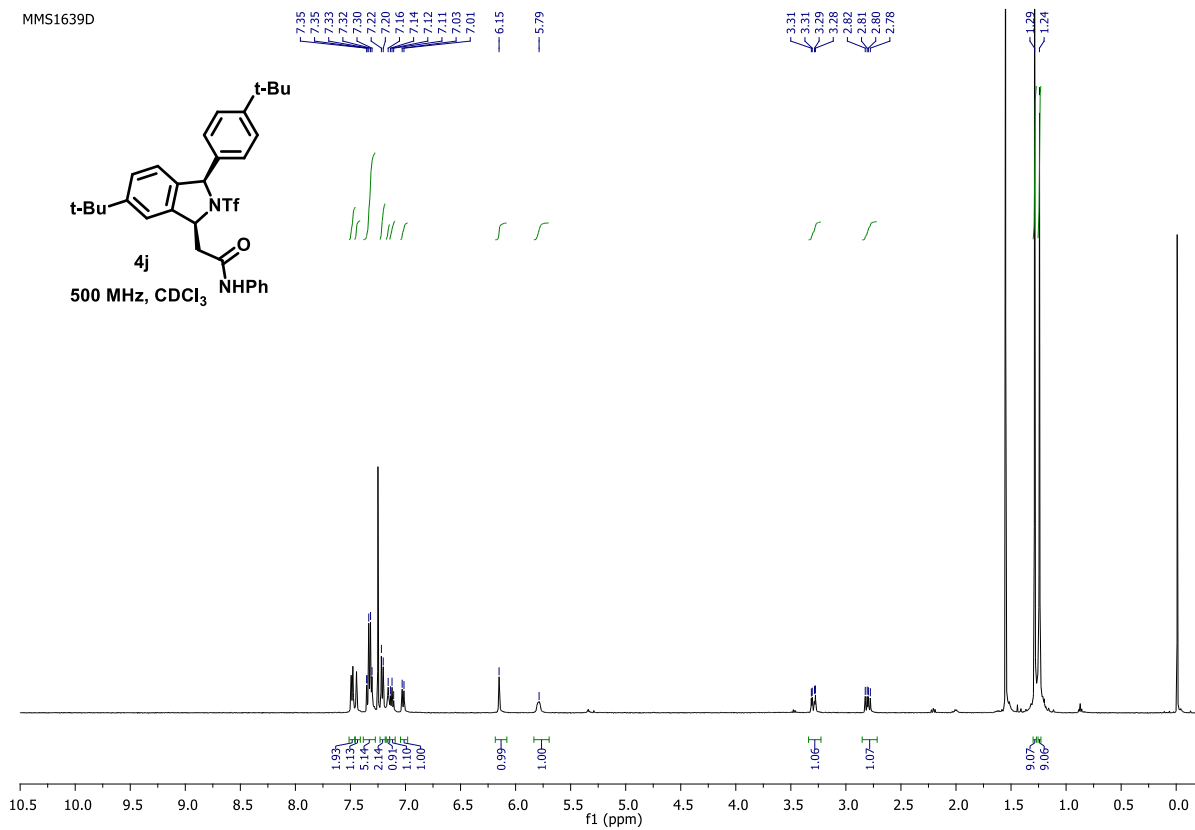

MMS1639D

single pulse decoupled gated NOE

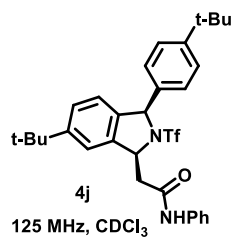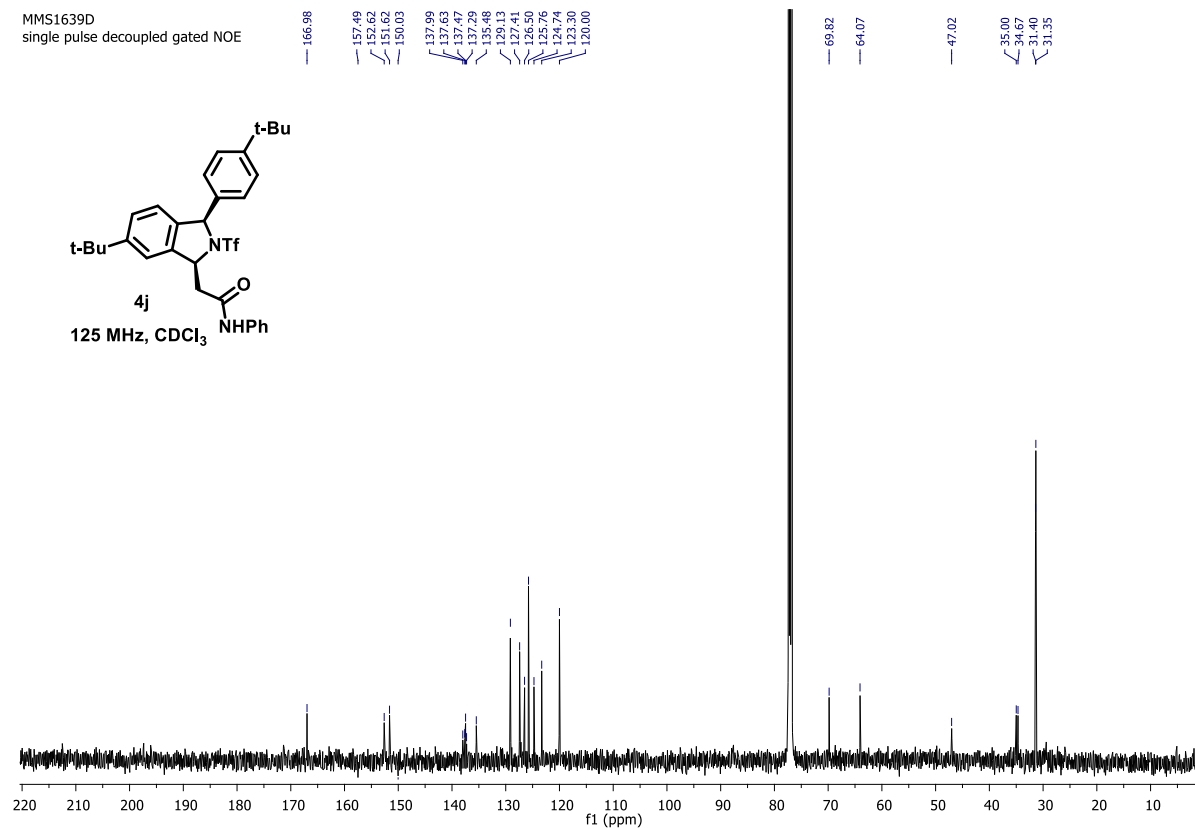

S#369104

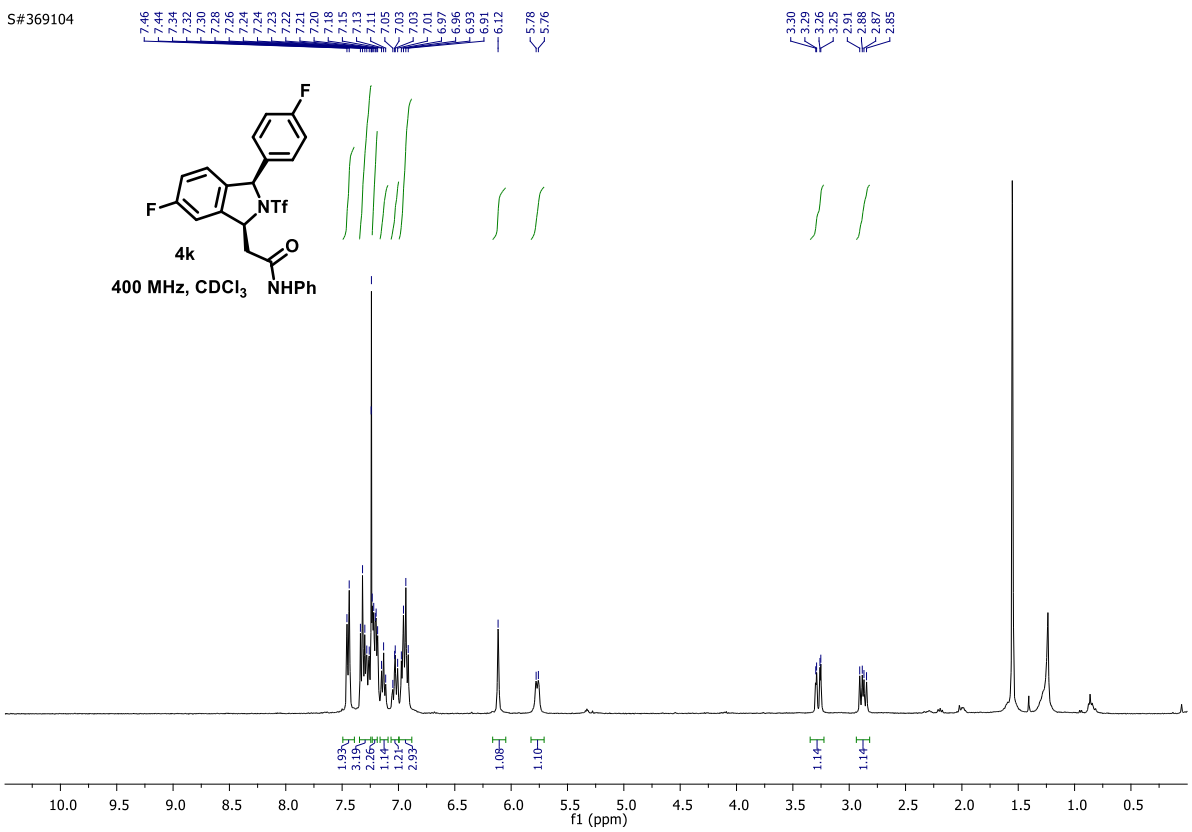

S#858085

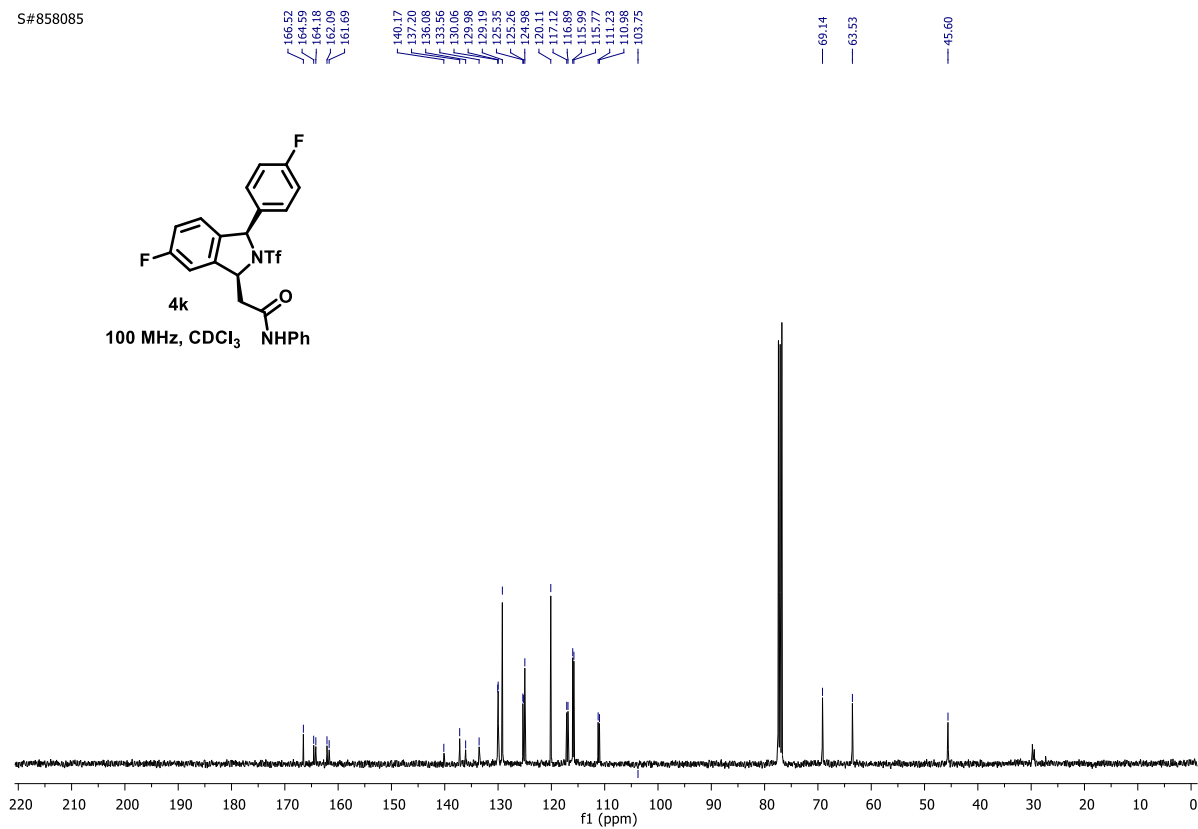

S#384411

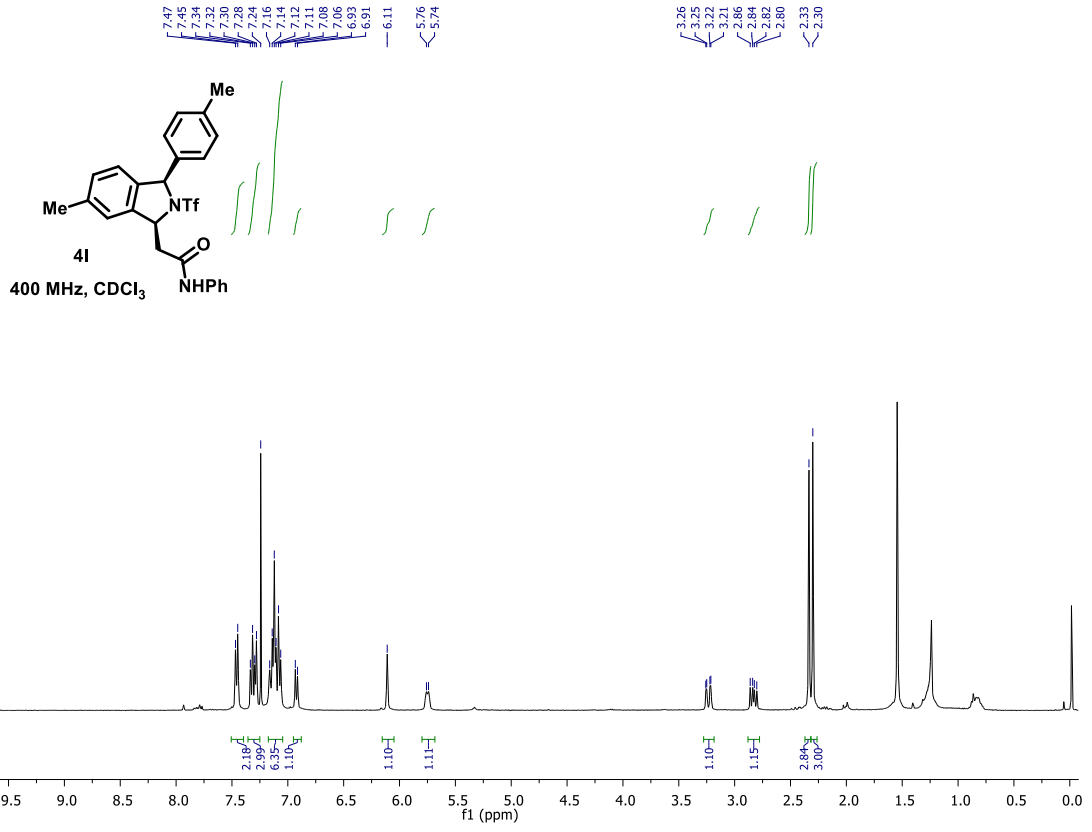

S#530420

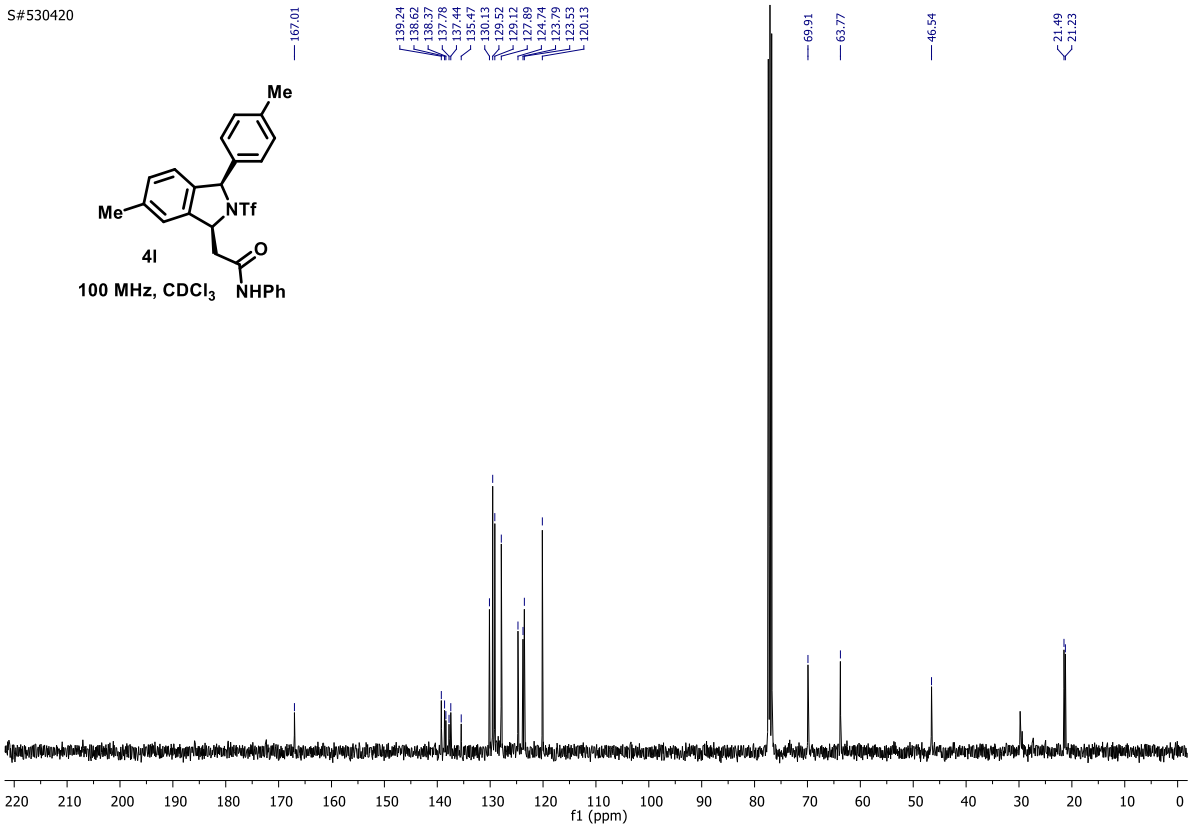

## 6. HPLC Spectra of Compounds 3 and 4

### HPLC Chromatogram of Compound 3a (Racemic)

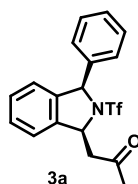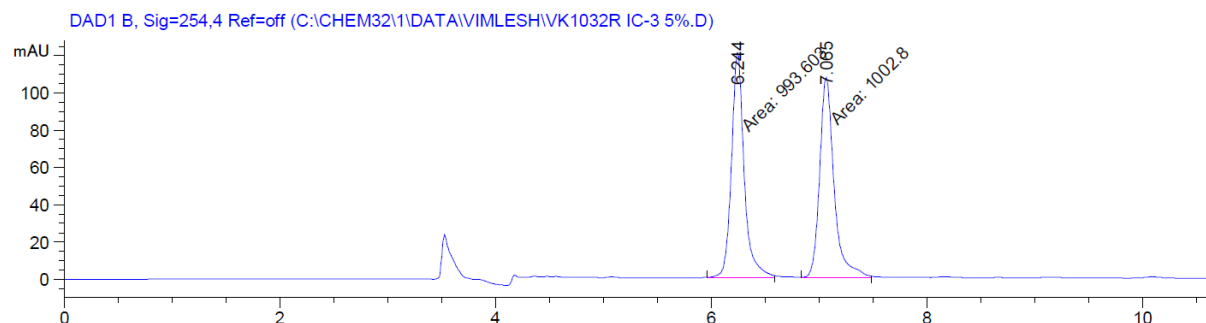

| Peak # | RetTime [min] | Type | Width [min] | Area [mAU*s] | Height [mAU] | Area %  |
|--------|---------------|------|-------------|--------------|--------------|---------|
| 1      | 6.244         | MM   | 0.1367      | 993.60272    | 121.16410    | 49.7697 |
| 2      | 7.065         | MM   | 0.1552      | 1002.79694   | 107.65569    | 50.2303 |

### HPLC Chromatogram of Compound 3a (Chiral)

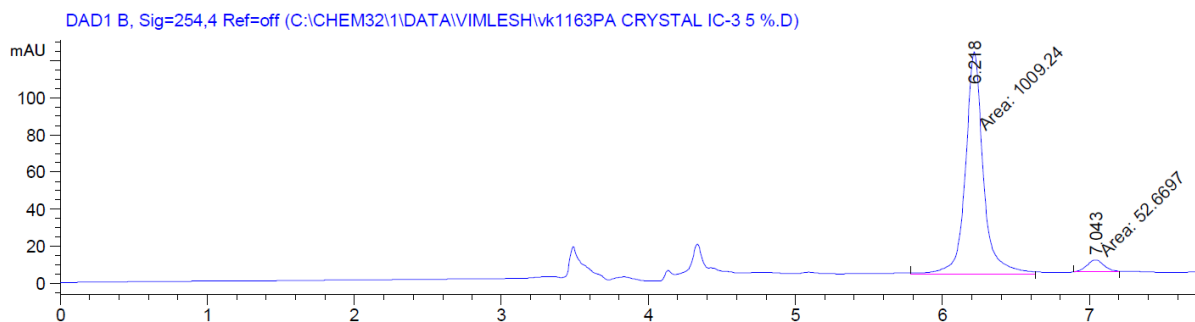

| Peak # | RetTime [min] | Type | Width [min] | Area [mAU*s] | Height [mAU] | Area %  |
|--------|---------------|------|-------------|--------------|--------------|---------|
| 1      | 6.218         | MM   | 0.1403      | 1009.24139   | 119.89330    | 95.0401 |
| 2      | 7.043         | MM   | 0.1357      | 52.66973     | 6.47013      | 4.9599  |

HPLC Chromatogram of Compound 3b (Racemic)

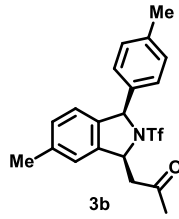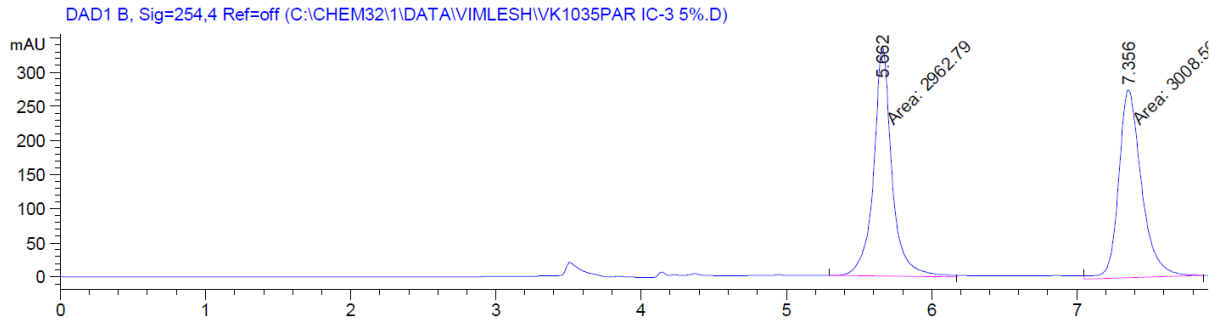

| Peak # | RetTime [min] | Type | Width [min] | Area [mAU*s] | Height [mAU] | Area %  |
|--------|---------------|------|-------------|--------------|--------------|---------|
| 1      | 5.662         | MM   | 0.1464      | 2962.78589   | 337.38437    | 49.6167 |
| 2      | 7.356         | MM   | 0.1824      | 3008.55713   | 274.91068    | 50.3833 |

HPLC Chromatogram of Compound 3b (Chiral)

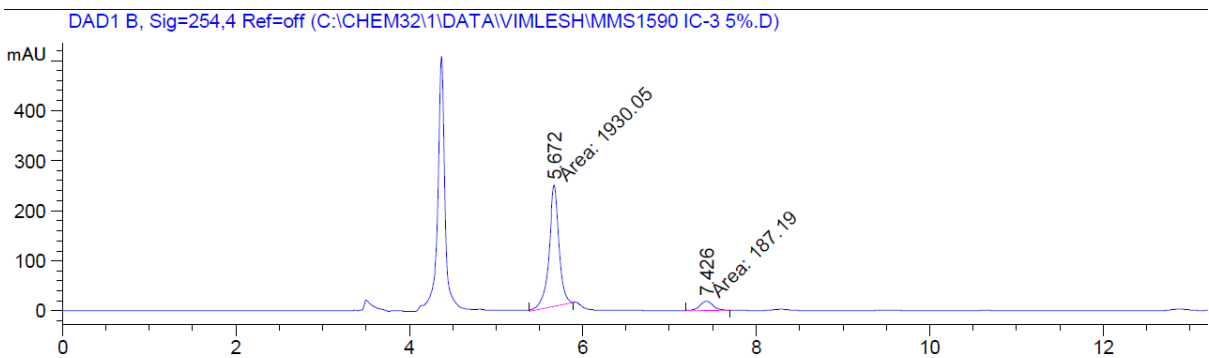

| Peak # | RetTime [min] | Type | Width [min] | Area [mAU*s] | Height [mAU] | Area %  |
|--------|---------------|------|-------------|--------------|--------------|---------|
| 1      | 5.672         | MM   | 0.1329      | 1930.05249   | 241.99738    | 91.1588 |
| 2      | 7.426         | MM   | 0.1684      | 187.18967    | 18.52206     | 8.8412  |

HPLC Chromatogram of Compound 3c (Racemic)

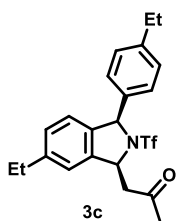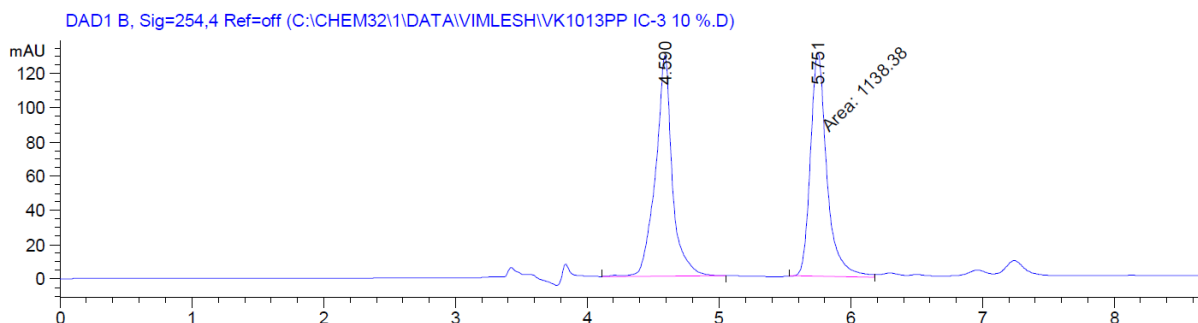

| Peak # | RetTime [min] | Type | Width [min] | Area [mAU*s] | Height [mAU] | Area %  |
|--------|---------------|------|-------------|--------------|--------------|---------|
| 1      | 4.590         | VB R | 0.1230      | 1139.04150   | 128.99013    | 50.0144 |
| 2      | 5.751         | MM   | 0.1447      | 1138.38367   | 131.12175    | 49.9856 |

HPLC Chromatogram of Compound 3c (Chiral)

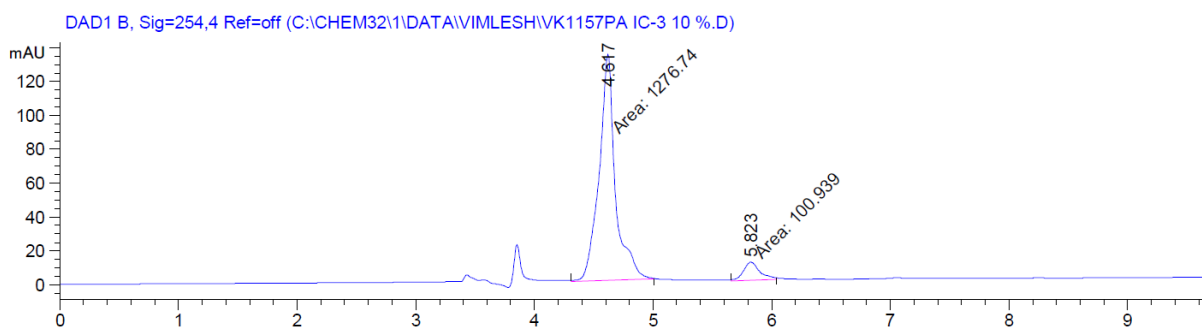

| Peak # | RetTime [min] | Type | Width [min] | Area [mAU*s] | Height [mAU] | Area %  |
|--------|---------------|------|-------------|--------------|--------------|---------|
| 1      | 4.617         | MM   | 0.1594      | 1276.74133   | 133.52121    | 92.6733 |
| 2      | 5.823         | MM   | 0.1581      | 100.93903    | 10.64403     | 7.3267  |

HPLC Chromatogram of Compound 3d (Racemic)

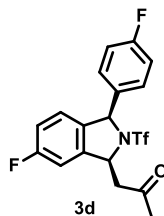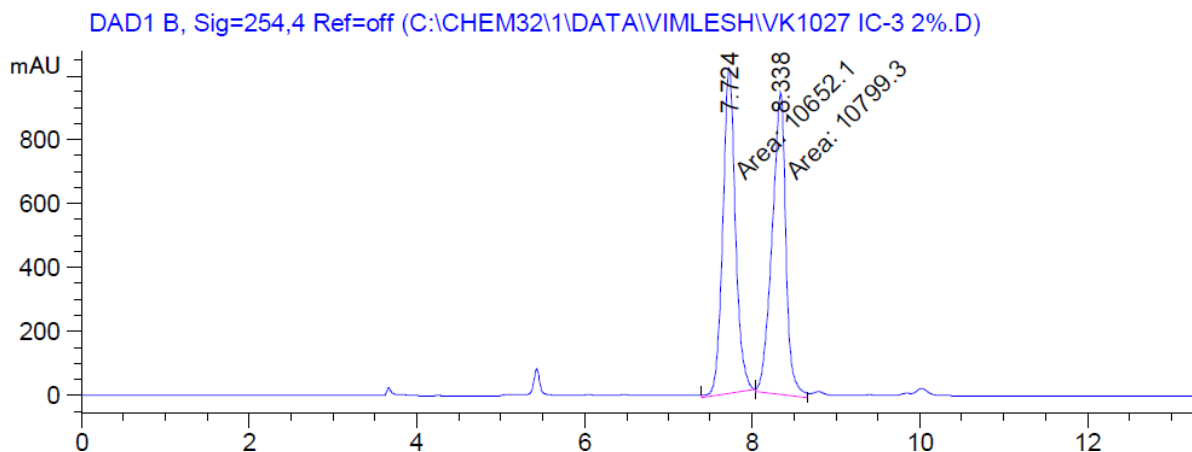

| Peak # | RetTime [min] | Type | Width [min] | Area [mAU*s] | Height [mAU] | Area %  |
|--------|---------------|------|-------------|--------------|--------------|---------|
| 1      | 7.724         | MM   | 0.1743      | 1.06521e4    | 1018.49365   | 49.6569 |
| 2      | 8.338         | MM   | 0.1906      | 1.07993e4    | 944.29584    | 50.3431 |

HPLC Chromatogram of Compound 3d (Chiral)

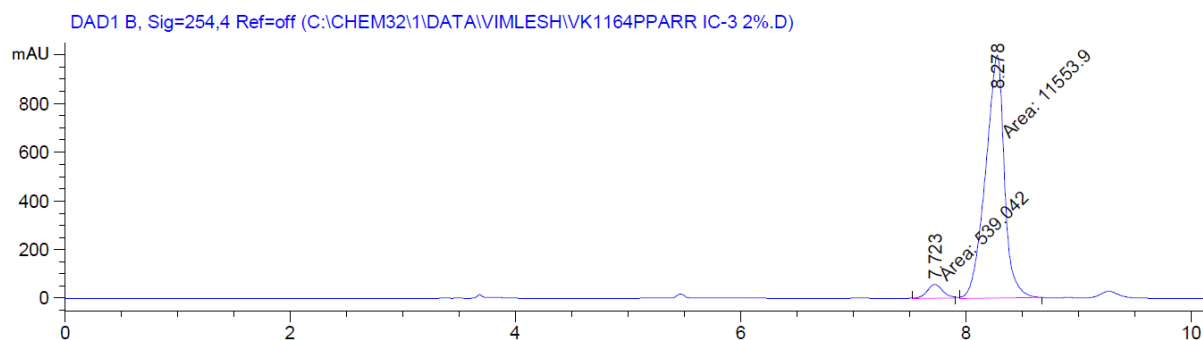

| Peak # | RetTime [min] | Type | Width [min] | Area [mAU*s] | Height [mAU] | Area %  |
|--------|---------------|------|-------------|--------------|--------------|---------|
| 1      | 7.723         | MM   | 0.1578      | 539.04181    | 56.94296     | 4.4575  |
| 2      | 8.278         | MM   | 0.1929      | 1.15539e4    | 998.44409    | 95.5425 |

### HPLC Chromatogram of Compound 3e (Racemic)

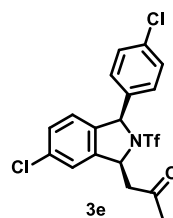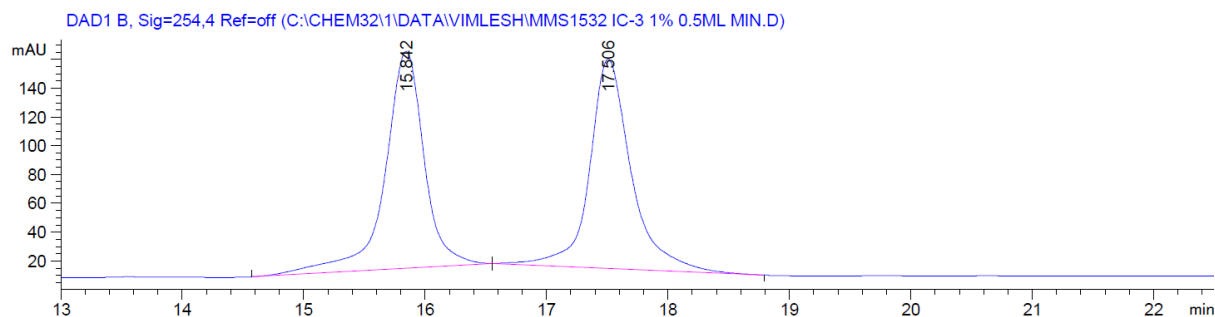

| Peak # | RetTime [min] | Type | Width [min] | Area [mAU*s] | Height [mAU] | Area %  |
|--------|---------------|------|-------------|--------------|--------------|---------|
| 1      | 15.842        | BB   | 0.3378      | 3408.47729   | 150.72656    | 49.4237 |
| 2      | 17.506        | BB   | 0.3557      | 3487.96191   | 145.48553    | 50.5763 |

### HPLC Chromatogram of Compound 3e (Chiral)

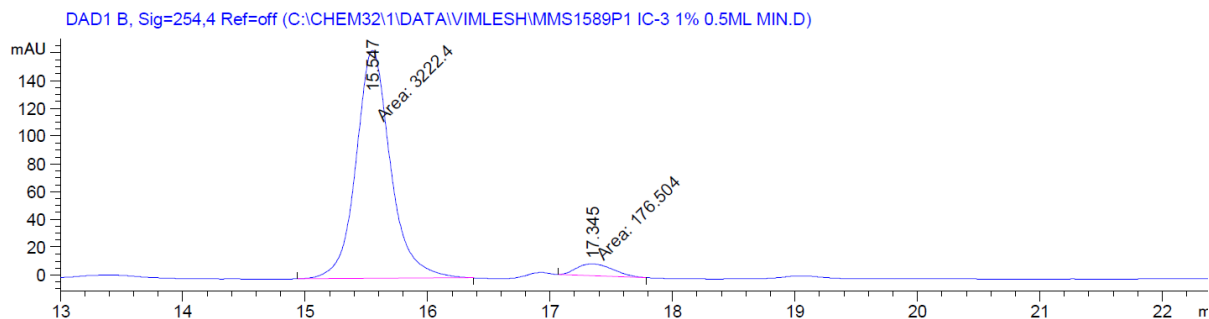

| Peak # | RetTime [min] | Type | Width [min] | Area [mAU*s] | Height [mAU] | Area %  |
|--------|---------------|------|-------------|--------------|--------------|---------|
| 1      | 15.547        | MM   | 0.3280      | 3239.69238   | 164.60991    | 94.9706 |
| 2      | 17.338        | MM   | 0.3347      | 171.56528    | 8.54222      | 5.0294  |



### HPLC Chromatogram of Compound 3f (Racemic)

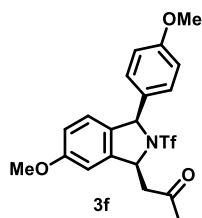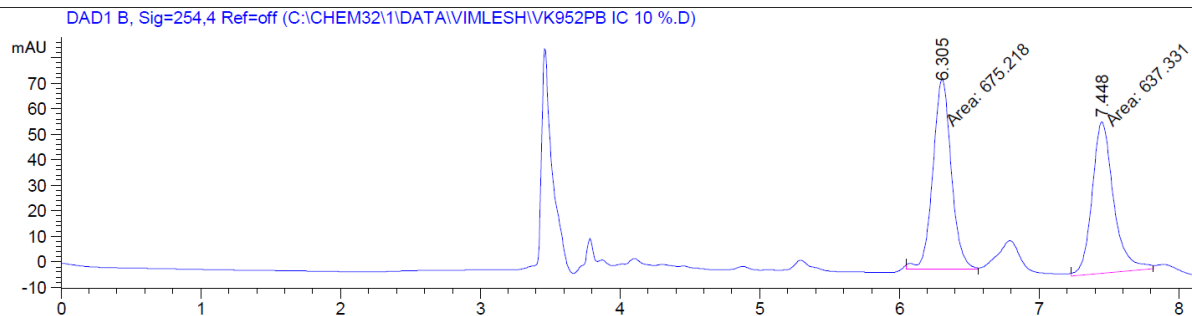

| Peak # | RetTime [min] | Type | Width [min] | Area [mAU*s] | Height [mAU] | Area %  |
|--------|---------------|------|-------------|--------------|--------------|---------|
| 1      | 6.305         | MM   | 0.1513      | 675.21777    | 74.38501     | 51.4433 |
| 2      | 7.448         | MM   | 0.1788      | 637.33069    | 59.41415     | 48.5567 |

### HPLC Chromatogram of Compound 3f (Chiral)

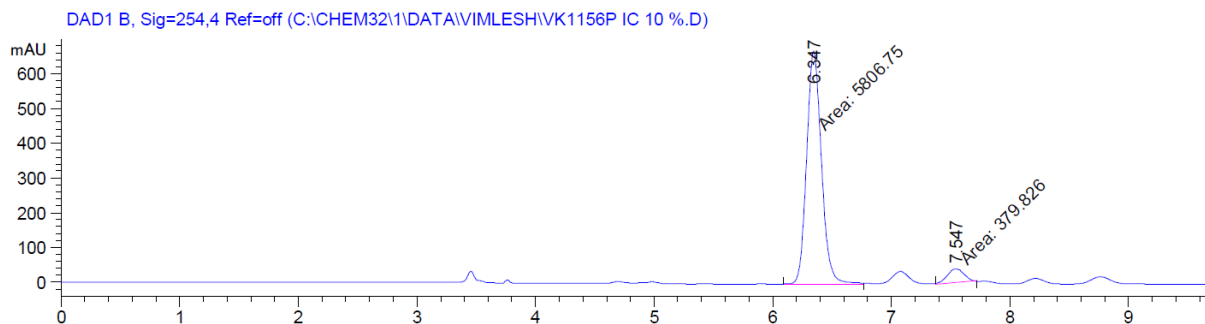

| Peak # | RetTime [min] | Type | Width [min] | Area [mAU*s] | Height [mAU] | Area %  |
|--------|---------------|------|-------------|--------------|--------------|---------|
| 1      | 6.347         | MM   | 0.1444      | 5806.75391   | 670.22614    | 93.8605 |
| 2      | 7.547         | MM   | 0.1608      | 379.82629    | 39.37726     | 6.1395  |

### HPLC Chromatogram of Compound 3g (Racemic)

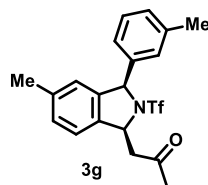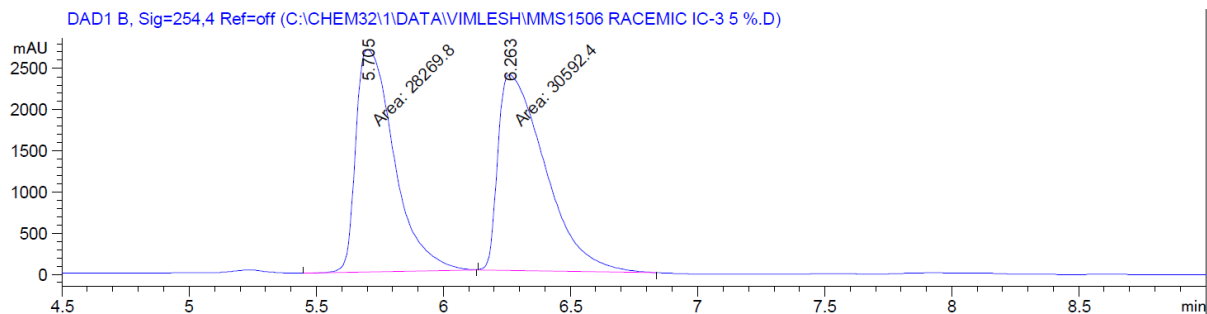

| Peak # | RetTime [min] | Type | Width [min] | Area [mAU*s] | Height [mAU] | Area %  |
|--------|---------------|------|-------------|--------------|--------------|---------|
| 1      | 5.705         | MM   | 0.1745      | 2.82698e4    | 2699.43188   | 48.0271 |
| 2      | 6.263         | MM   | 0.2147      | 3.05924e4    | 2375.30981   | 51.9729 |

### HPLC Chromatogram of Compound 3g (Chiral)

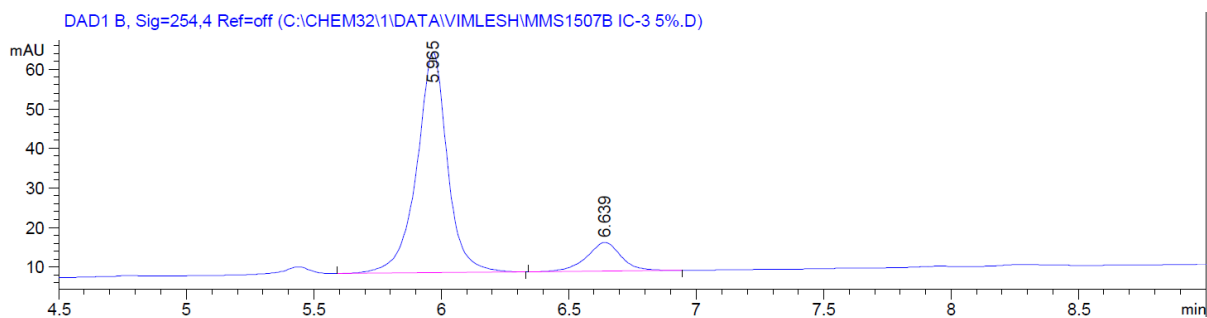

| Peak # | RetTime [min] | Type | Width [min] | Area [mAU*s] | Height [mAU] | Area %  |
|--------|---------------|------|-------------|--------------|--------------|---------|
| 1      | 5.965         | MM   | 0.1408      | 473.16995    | 56.02436     | 87.4266 |
| 2      | 6.639         | MM   | 0.1557      | 68.04948     | 7.28279      | 12.5734 |

HPLC Chromatogram of Compound 3h (Racemic)

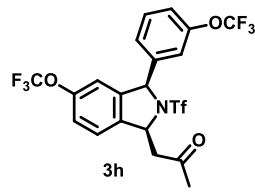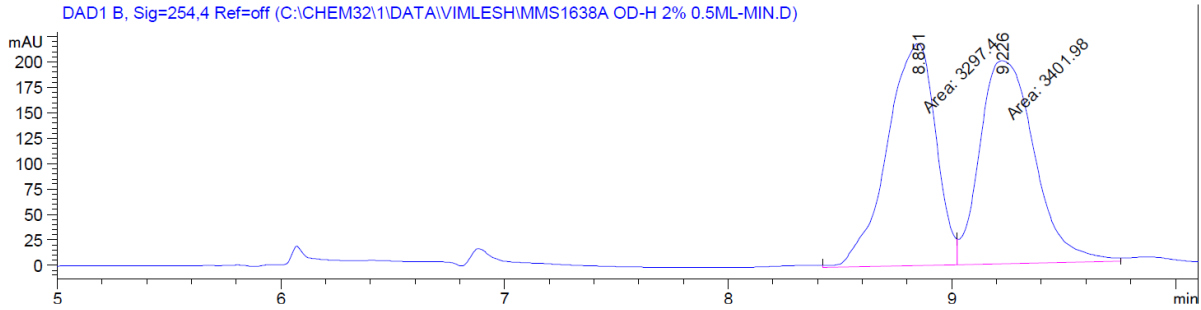

| Peak # | RetTime [min] | Type | Width [min] | Area [mAU*s] | Height [mAU] | Area %  |
|--------|---------------|------|-------------|--------------|--------------|---------|
| 1      | 8.851         | MF   | 0.2515      | 3297.40234   | 218.53894    | 49.2195 |
| 2      | 9.226         | FM   | 0.2839      | 3401.98364   | 199.69458    | 50.7805 |

HPLC Chromatogram of Compound 3h (Racemic)

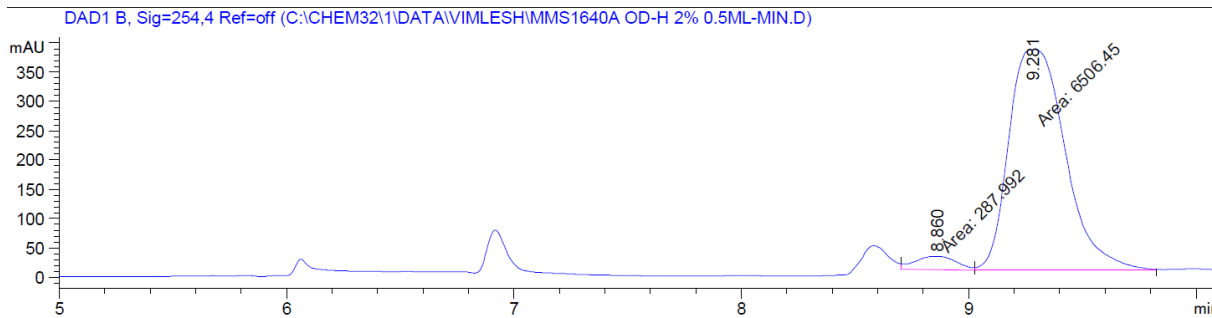

| Peak # | RetTime [min] | Type | Width [min] | Area [mAU*s] | Height [mAU] | Area %  |
|--------|---------------|------|-------------|--------------|--------------|---------|
| 1      | 8.866         | MM   | 0.2121      | 297.47137    | 23.37257     | 4.3662  |
| 2      | 9.281         | MM   | 0.2880      | 6515.60742   | 377.09998    | 95.6338 |

### HPLC Chromatogram of Compound 3i (Racemic)

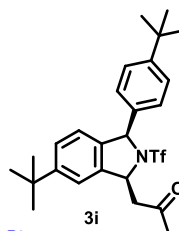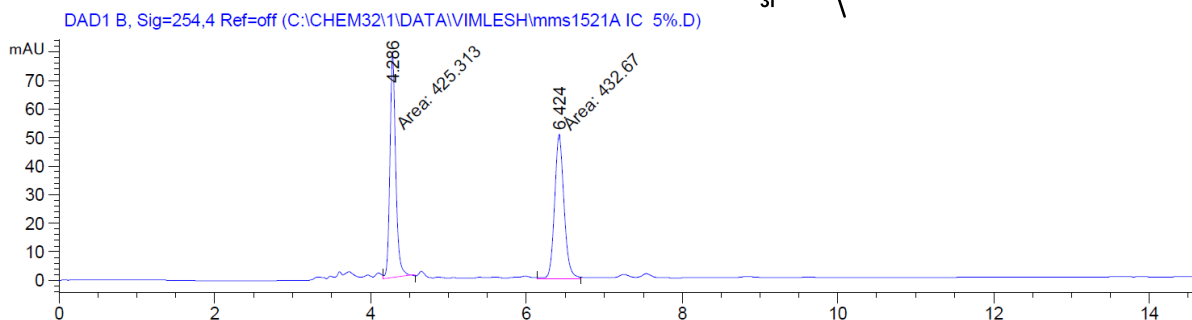

| Peak # | RetTime [min] | Type | Width [min] | Area [mAU*s] | Height [mAU] | Area %  |
|--------|---------------|------|-------------|--------------|--------------|---------|
| 1      | 4.286         | MM   | 0.0890      | 425.31323    | 79.64146     | 49.5713 |
| 2      | 6.424         | MM   | 0.1427      | 432.67014    | 50.53651     | 50.4287 |

### HPLC Chromatogram of Compound 3i (chiral)

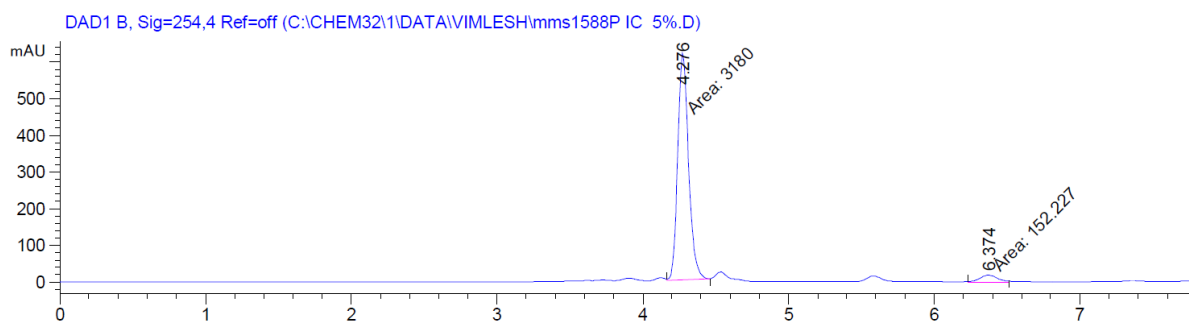

| Peak # | RetTime [min] | Type | Width [min] | Area [mAU*s] | Height [mAU] | Area %  |
|--------|---------------|------|-------------|--------------|--------------|---------|
| 1      | 4.276         | MM   | 0.0855      | 3179.99658   | 619.74030    | 95.4317 |
| 2      | 6.374         | MM   | 0.1381      | 152.22742    | 18.36839     | 4.5683  |

### HPLC Chromatogram of Compound 3j (Racemic)

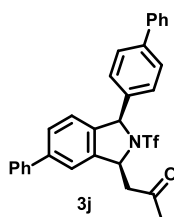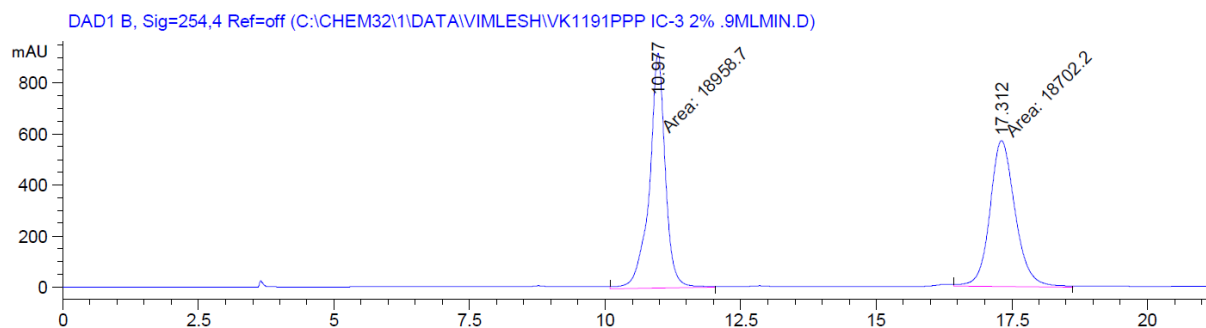

| Peak # | RetTime [min] | Type | Width [min] | Area [mAU*s] | Height [mAU] | Area %  |
|--------|---------------|------|-------------|--------------|--------------|---------|
| 1      | 10.977        | MM   | 0.3434      | 1.89587e4    | 920.15253    | 50.3405 |
| 2      | 17.312        | MM   | 0.5447      | 1.87022e4    | 572.20557    | 49.6595 |

### HPLC Chromatogram of Compound 3j (Chiral)

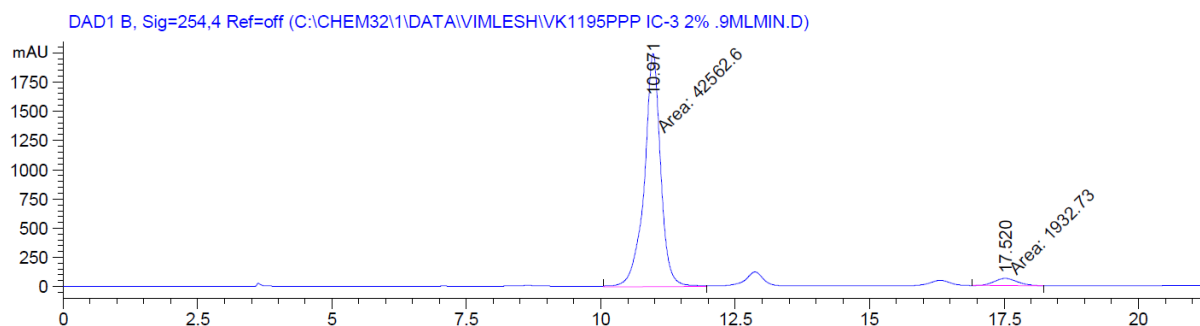

| Peak # | RetTime [min] | Type | Width [min] | Area [mAU*s] | Height [mAU] | Area %  |
|--------|---------------|------|-------------|--------------|--------------|---------|
| 1      | 10.971        | MM   | 0.3553      | 4.25626e4    | 1996.31531   | 95.6563 |
| 2      | 17.520        | MM   | 0.5117      | 1932.72607   | 62.95689     | 4.3437  |

### HPLC Chromatogram of Compound 3k (Racemic)

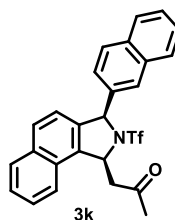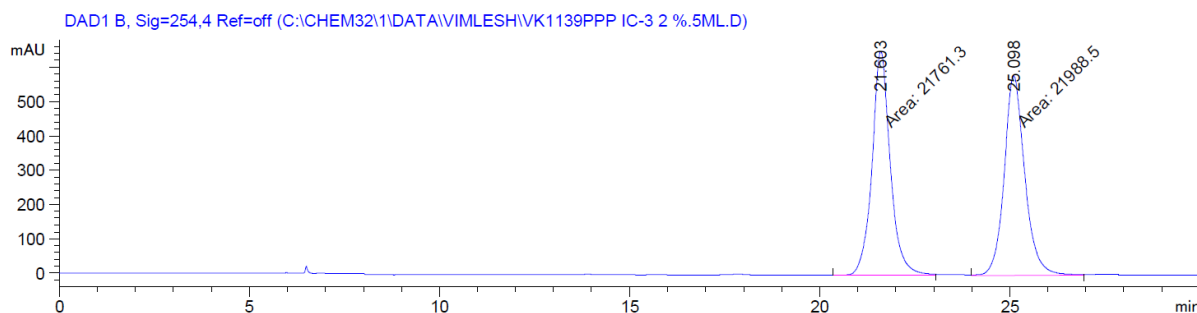

| Peak # | RetTime [min] | Type | Width [min] | Area [mAU*s] | Height [mAU] | Area %  |
|--------|---------------|------|-------------|--------------|--------------|---------|
| 1      | 21.603        | MM   | 0.5564      | 2.17613e4    | 651.86334    | 49.7403 |
| 2      | 25.098        | MM   | 0.6298      | 2.19885e4    | 581.87134    | 50.2597 |

### HPLC Chromatogram of Compound 3k (chiral)

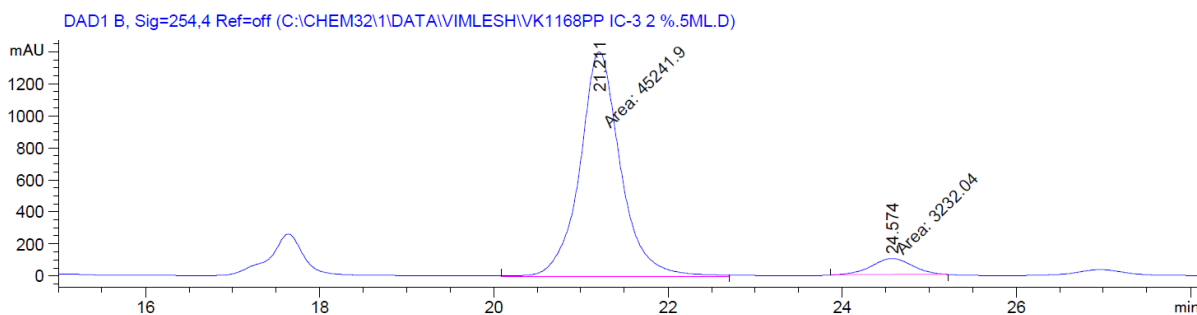

| Peak # | RetTime [min] | Type | Width [min] | Area [mAU*s] | Height [mAU] | Area %  |
|--------|---------------|------|-------------|--------------|--------------|---------|
| 1      | 21.211        | MM   | 0.5340      | 4.49417e4    | 1402.58838   | 92.3579 |
| 2      | 24.574        | MM   | 0.5812      | 3718.68262   | 106.64301    | 7.6421  |

### HPLC Chromatogram of Compound 31 (Racemic)

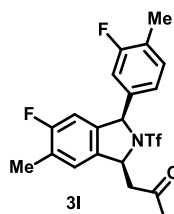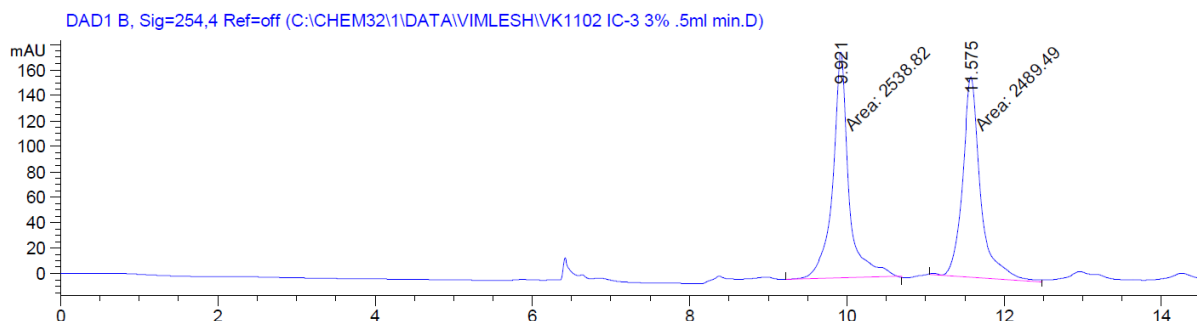

| Peak # | RetTime [min] | Type | Width [min] | Area [mAU*s] | Height [mAU] | Area %  |
|--------|---------------|------|-------------|--------------|--------------|---------|
| 1      | 9.921         | MM   | 0.2384      | 2538.82202   | 177.47005    | 50.4906 |
| 2      | 11.575        | MM   | 0.2636      | 2489.48755   | 157.40889    | 49.5094 |

### HPLC Chromatogram of Compound 31 (Chiral)

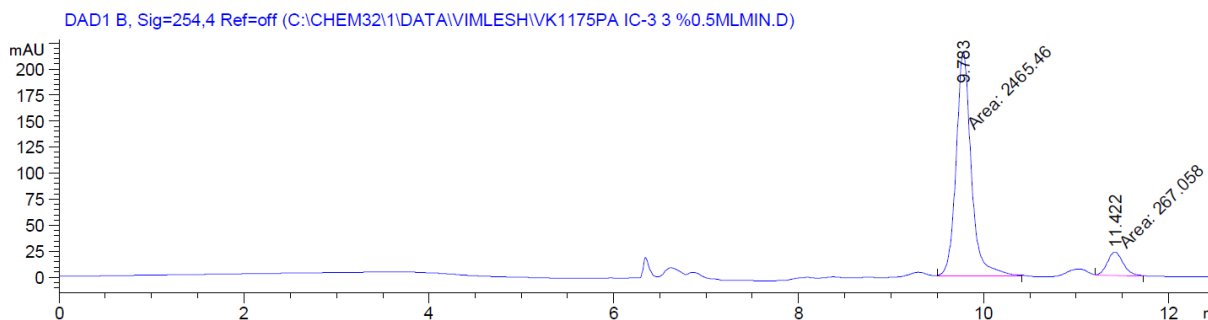

| Peak # | RetTime [min] | Type | Width [min] | Area [mAU*s] | Height [mAU] | Area %  |
|--------|---------------|------|-------------|--------------|--------------|---------|
| 1      | 9.783         | MM   | 0.1904      | 2465.45923   | 215.80150    | 90.2267 |
| 2      | 11.422        | MM   | 0.1983      | 267.05786    | 22.45020     | 9.7733  |

### HPLC Chromatogram of Compound 3m (Racemic)

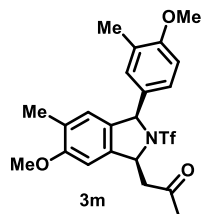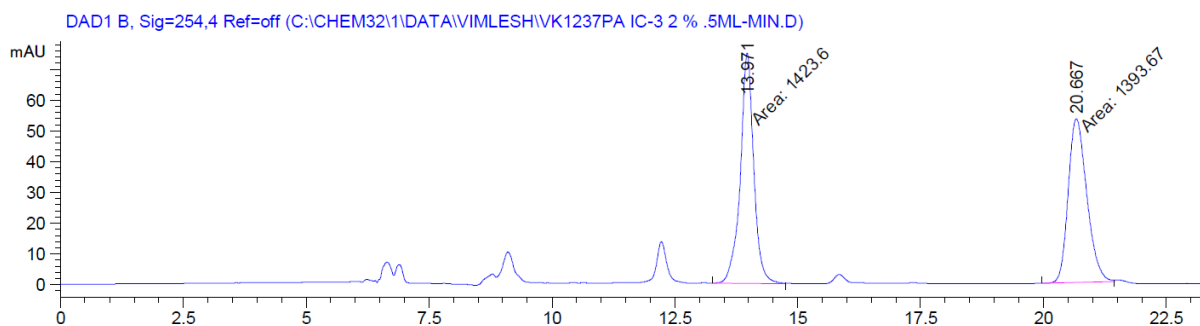

| Peak # | RetTime [min] | Type | Width [min] | Area [mAU*s] | Height [mAU] | Area %  |
|--------|---------------|------|-------------|--------------|--------------|---------|
| 1      | 13.971        | MM   | 0.3173      | 1423.60010   | 74.78687     | 50.5313 |
| 2      | 20.667        | MM   | 0.4372      | 1393.66541   | 53.12901     | 49.4687 |

### HPLC Chromatogram of Compound 3m (Chiral)

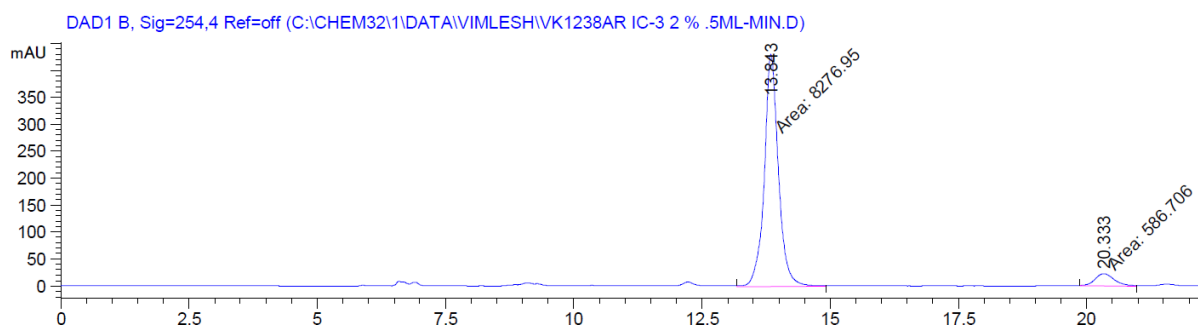

| Peak # | RetTime [min] | Type | Width [min] | Area [mAU*s] | Height [mAU] | Area %  |
|--------|---------------|------|-------------|--------------|--------------|---------|
| 1      | 13.843        | MM   | 0.3197      | 8276.94531   | 431.42938    | 93.3808 |
| 2      | 20.333        | MM   | 0.4326      | 586.70599    | 22.60211     | 6.6192  |



### HPLC Chromatogram of Compound 3n (Racemic)

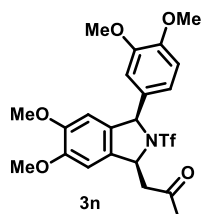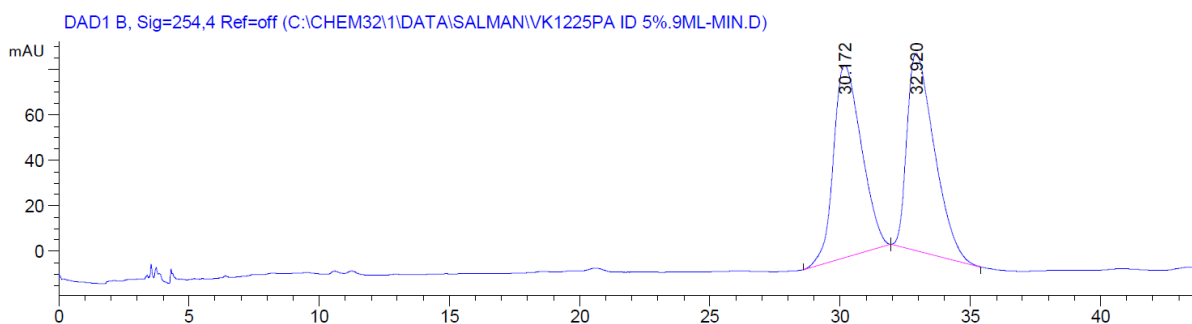

| Peak # | RetTime [min] | Type | Width [min] | Area [mAU*s] | Height [mAU] | Area %  |
|--------|---------------|------|-------------|--------------|--------------|---------|
| 1      | 30.172        | BB   | 1.0990      | 6306.24316   | 84.66151     | 49.7696 |
| 2      | 32.920        | BB   | 1.0724      | 6364.63818   | 86.90709     | 50.2304 |

### HPLC Chromatogram of Compound 3n (Chiral)

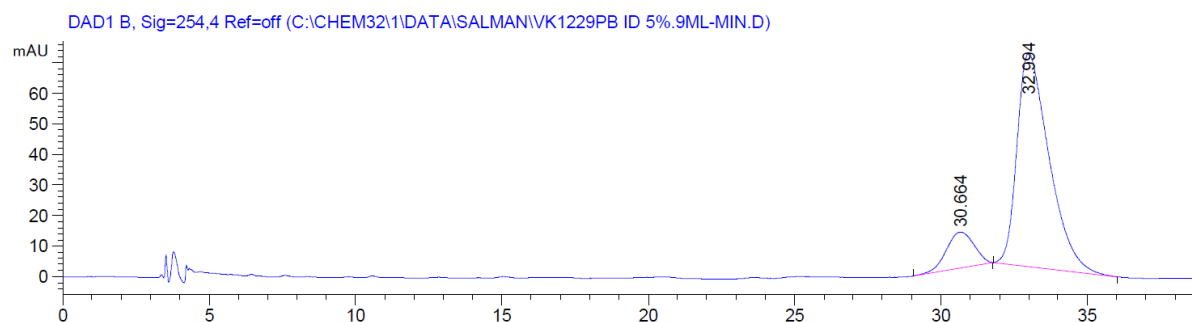

| Peak # | RetTime [min] | Type | Width [min] | Area [mAU*s] | Height [mAU] | Area %  |
|--------|---------------|------|-------------|--------------|--------------|---------|
| 1      | 30.664        | BB   | 0.7859      | 772.06158    | 11.79151     | 12.6554 |
| 2      | 32.994        | BB   | 1.0851      | 5328.58838   | 69.91817     | 87.3446 |

### HPLC Chromatogram of Compound 4b (Racemic)

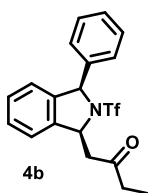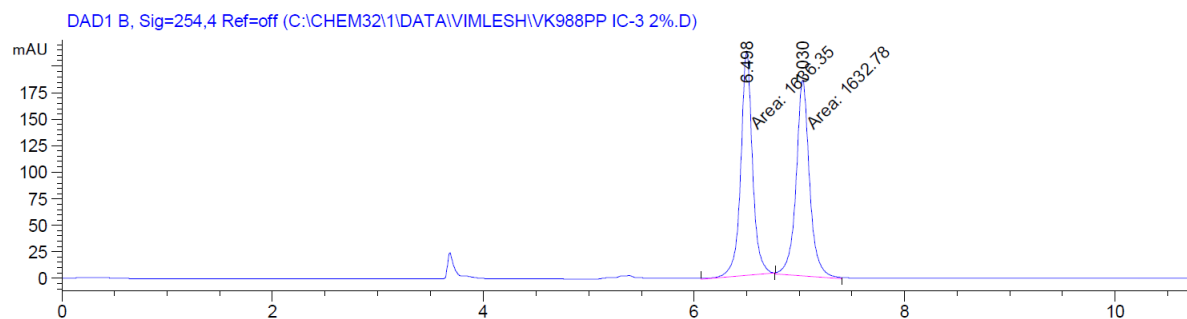

| Peak # | RetTime [min] | Type | Width [min] | Area [mAU*s] | Height [mAU] | Area %  |
|--------|---------------|------|-------------|--------------|--------------|---------|
| 1      | 6.498         | MM   | 0.1292      | 1636.35352   | 211.15944    | 50.0546 |
| 2      | 7.030         | MM   | 0.1474      | 1632.78479   | 184.55968    | 49.9454 |

### HPLC Chromatogram of Compound 4b (Chiral)

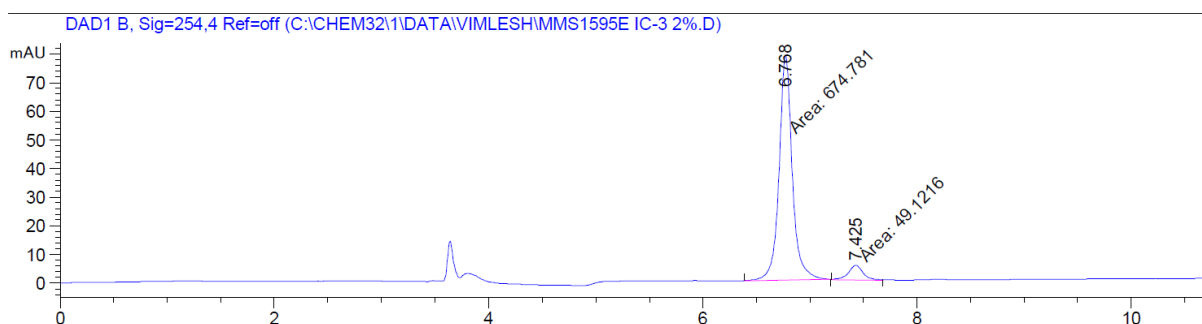

| Peak # | RetTime [min] | Type | Width [min] | Area [mAU*s] | Height [mAU] | Area %  |
|--------|---------------|------|-------------|--------------|--------------|---------|
| 1      | 6.768         | MM   | 0.1430      | 674.78076    | 78.66550     | 93.2143 |
| 2      | 7.425         | MM   | 0.1593      | 49.12161     | 5.13943      | 6.7857  |

### HPLC Chromatogram of Compound 4c (Racemic)

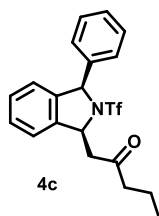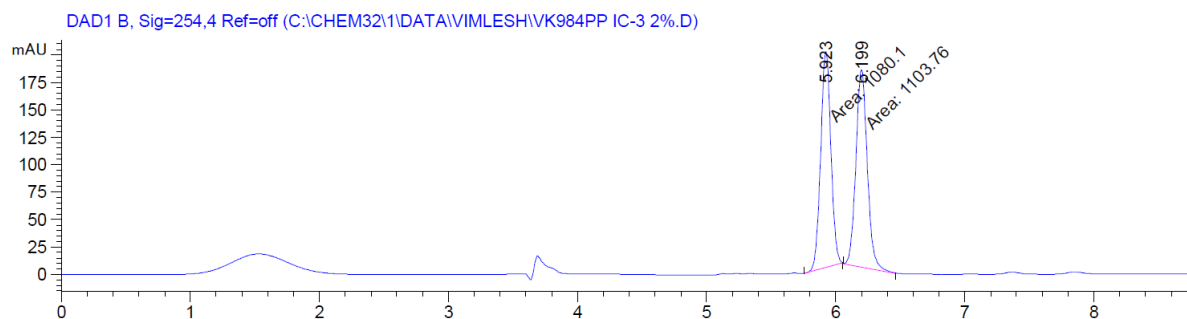

| Peak # | RetTime [min] | Type | Width [min] | Area [mAU*s] | Height [mAU] | Area %  |
|--------|---------------|------|-------------|--------------|--------------|---------|
| 1      | 5.923         | MM   | 0.0911      | 1080.09863   | 197.59573    | 49.4582 |
| 2      | 6.199         | MM   | 0.1021      | 1103.76428   | 180.20326    | 50.5418 |

### HPLC Chromatogram of Compound 4c (Chiral)

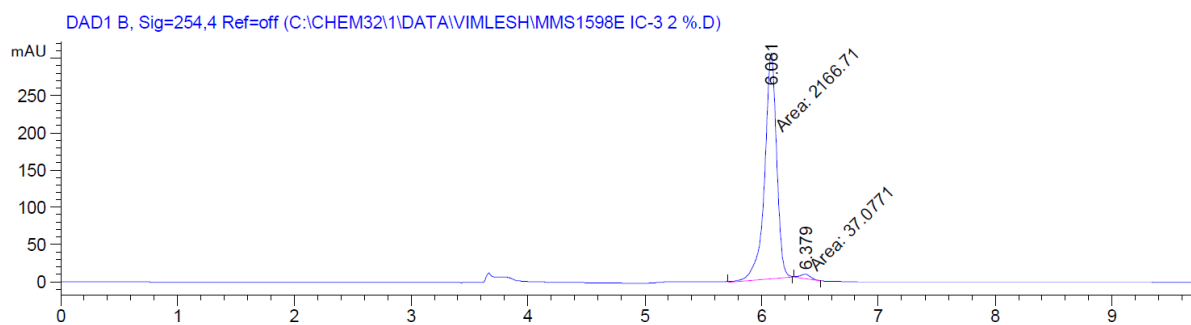

| Peak # | RetTime [min] | Type | Width [min] | Area [mAU*s] | Height [mAU] | Area %  |
|--------|---------------|------|-------------|--------------|--------------|---------|
| 1      | 6.081         | MM   | 0.1190      | 2166.70752   | 303.43588    | 98.3176 |
| 2      | 6.379         | MM   | 0.1043      | 37.07708     | 5.92617      | 1.6824  |

HPLC Chromatogram of Compound 4d (Racemic)

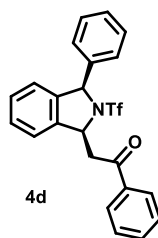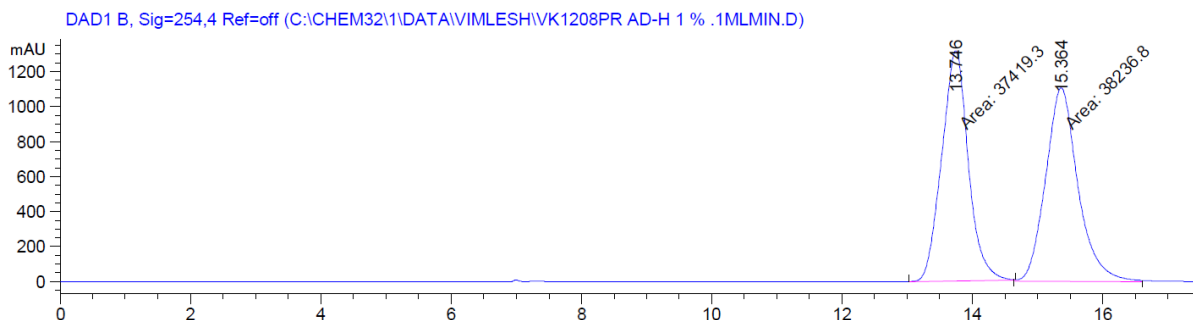

| Peak # | RetTime [min] | Type | Width [min] | Area [mAU*s] | Height [mAU] | Area %  |
|--------|---------------|------|-------------|--------------|--------------|---------|
| 1      | 13.746        | MM   | 0.4736      | 3.74193e4    | 1316.88147   | 49.4597 |
| 2      | 15.364        | MM   | 0.5754      | 3.82368e4    | 1107.56274   | 50.5403 |

HPLC Chromatogram of Compound 4d (Chiral)

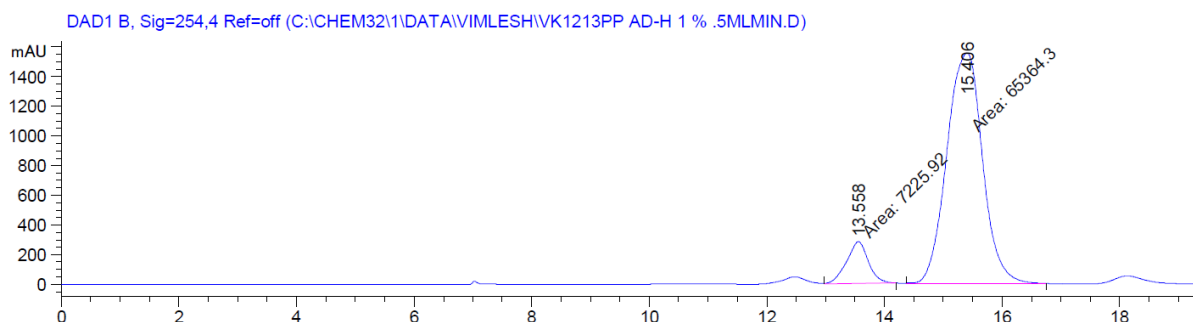

| Peak # | RetTime [min] | Type | Width [min] | Area [mAU*s] | Height [mAU] | Area %  |
|--------|---------------|------|-------------|--------------|--------------|---------|
| 1      | 13.558        | MM   | 0.4276      | 7225.92334   | 281.66183    | 9.9544  |
| 2      | 15.406        | MM   | 0.7024      | 6.53643e4    | 1550.87988   | 90.0456 |

### HPLC Chromatogram of Compound 4e (Racemic)

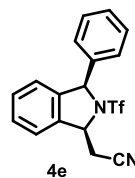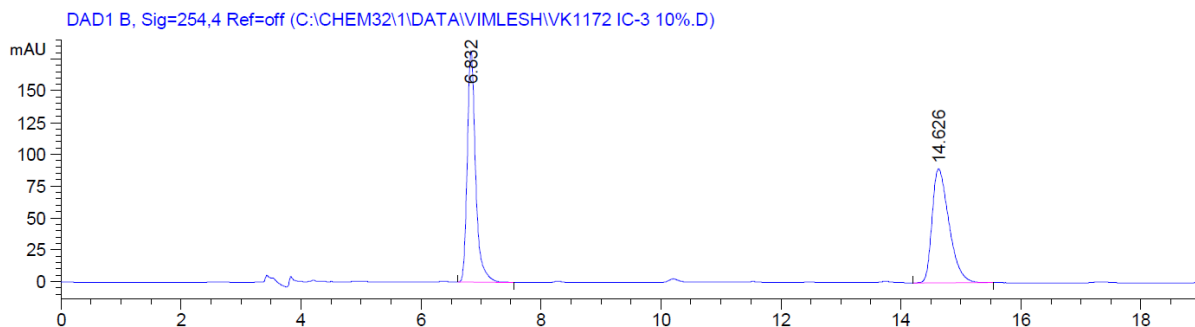

| Peak # | RetTime [min] | Type | Width [min] | Area [mAU*s] | Height [mAU] | Area %  |
|--------|---------------|------|-------------|--------------|--------------|---------|
| 1      | 6.832         | VB   | 0.1466      | 1752.72791   | 181.66571    | 50.0324 |
| 2      | 14.626        | BB   | 0.3022      | 1750.46118   | 89.49341     | 49.9676 |

### HPLC Chromatogram of Compound 4e (Chiral)

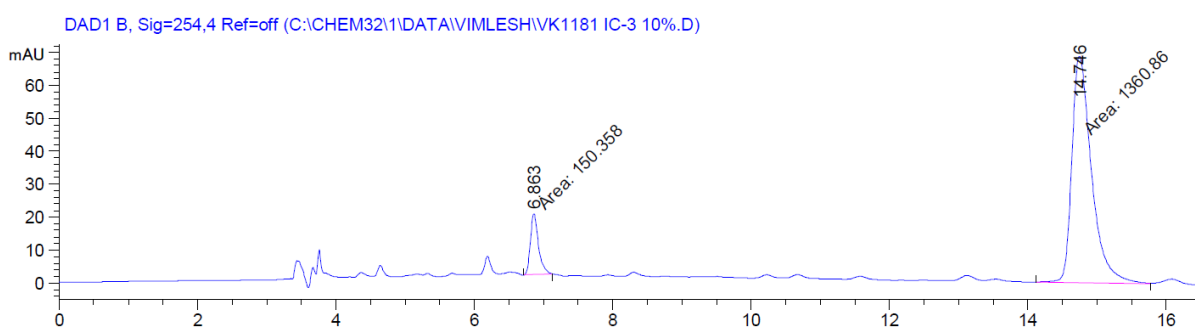

| Peak # | RetTime [min] | Type | Width [min] | Area [mAU*s] | Height [mAU] | Area %  |
|--------|---------------|------|-------------|--------------|--------------|---------|
| 1      | 6.863         | MM   | 0.1355      | 150.35840    | 18.49384     | 9.9495  |
| 2      | 14.746        | MM   | 0.3297      | 1360.85681   | 68.79140     | 90.0505 |

HPLC Chromatogram of Compound 4f (Racemic)

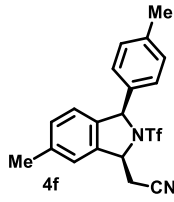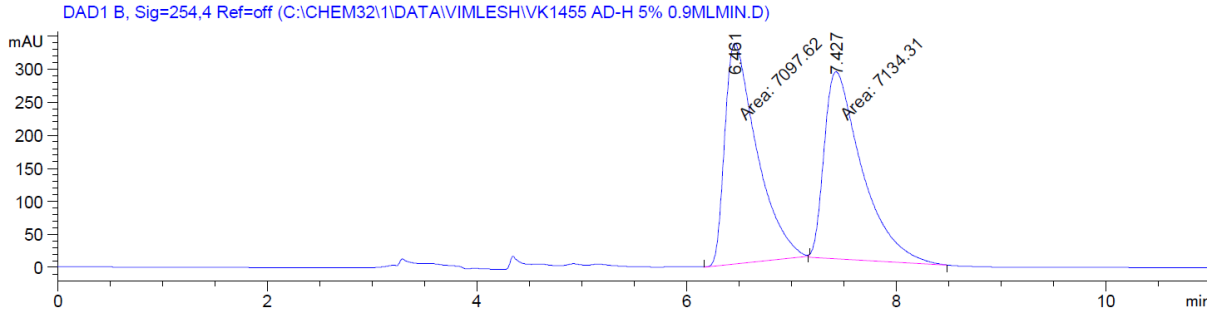

| Peak # | RetTime [min] | Type | Width [min] | Area [mAU*s] | Height [mAU] | Area %  |
|--------|---------------|------|-------------|--------------|--------------|---------|
| 1      | 6.461         | MM   | 0.3539      | 7097.61719   | 334.28638    | 49.8711 |
| 2      | 7.427         | MM   | 0.4197      | 7134.30811   | 283.31888    | 50.1289 |

HPLC Chromatogram of Compound 4f (chiral)

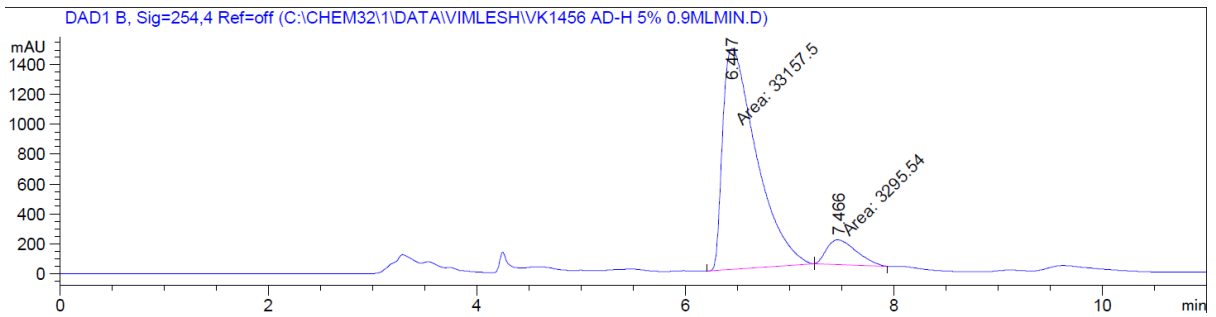

| Peak # | RetTime [min] | Type | Width [min] | Area [mAU*s] | Height [mAU] | Area %  |
|--------|---------------|------|-------------|--------------|--------------|---------|
| 1      | 6.447         | MM   | 0.3735      | 3.31575e4    | 1479.44995   | 90.9595 |
| 2      | 7.466         | MM   | 0.3323      | 3295.53735   | 165.30466    | 9.0405  |

### HPLC Chromatogram of Compound 4g (Racemic)

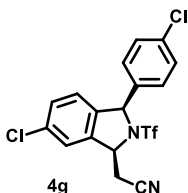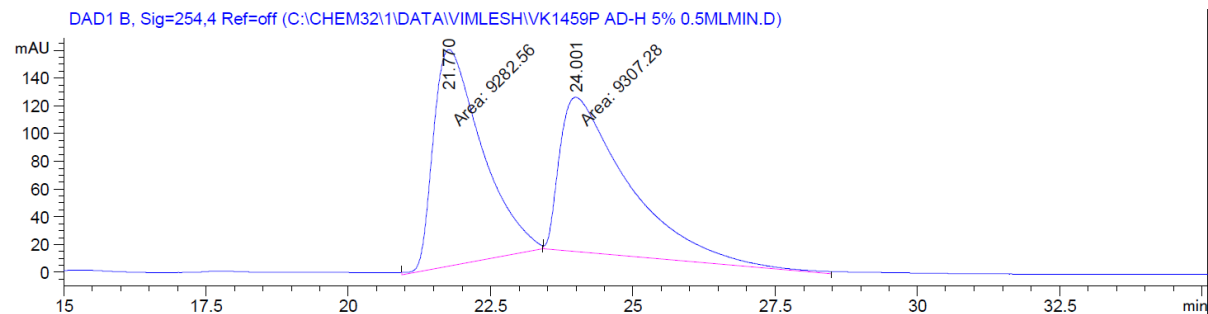

| Peak # | RetTime [min] | Type | Width [min] | Area [mAU*s] | Height [mAU] | Area %  |
|--------|---------------|------|-------------|--------------|--------------|---------|
| 1      | 21.770        | MM   | 0.9905      | 9282.55762   | 156.18779    | 49.9335 |
| 2      | 24.001        | MM   | 1.3959      | 9307.27734   | 111.12739    | 50.0665 |

### HPLC Chromatogram of Compound 4g (Chiral)

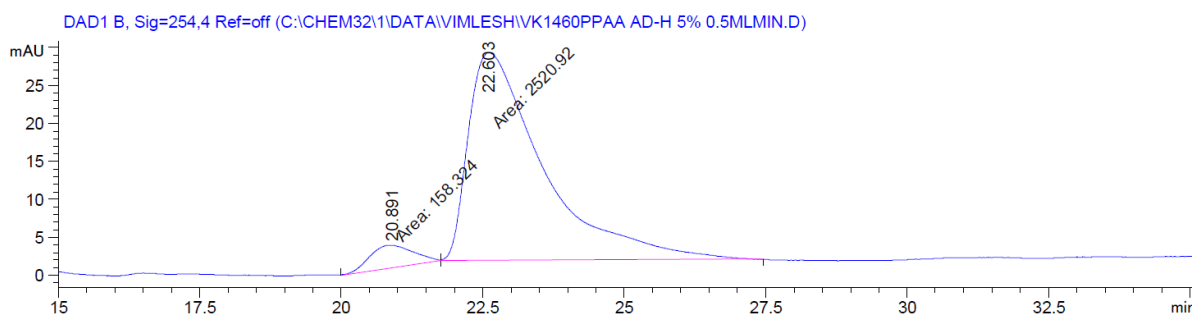

| Peak # | RetTime [min] | Type | Width [min] | Area [mAU*s] | Height [mAU] | Area %  |
|--------|---------------|------|-------------|--------------|--------------|---------|
| 1      | 20.891        | MM   | 0.8973      | 158.32405    | 2.94081      | 5.9093  |
| 2      | 22.603        | MM   | 1.5356      | 2520.92065   | 27.36070     | 94.0907 |

### HPLC Chromatogram of Compound 4h (Racemic)

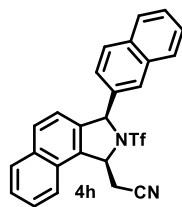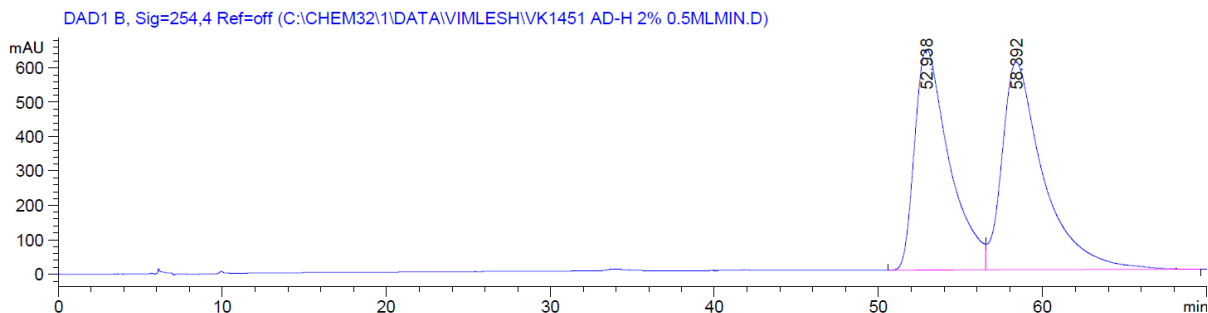

Signal 2: DAD1 B, Sig=254,4 Ref=off

| Peak # | RetTime [min] | Type | Width [min] | Area [mAU*s] | Height [mAU] | Area %  |
|--------|---------------|------|-------------|--------------|--------------|---------|
| 1      | 52.938        | MM   | 2.4574      | 9.46233e4    | 641.75934    | 47.6211 |
| 2      | 58.392        | MM   | 2.8673      | 1.04077e5    | 604.96198    | 52.3789 |

### HPLC Chromatogram of Compound 4h (Chiral)

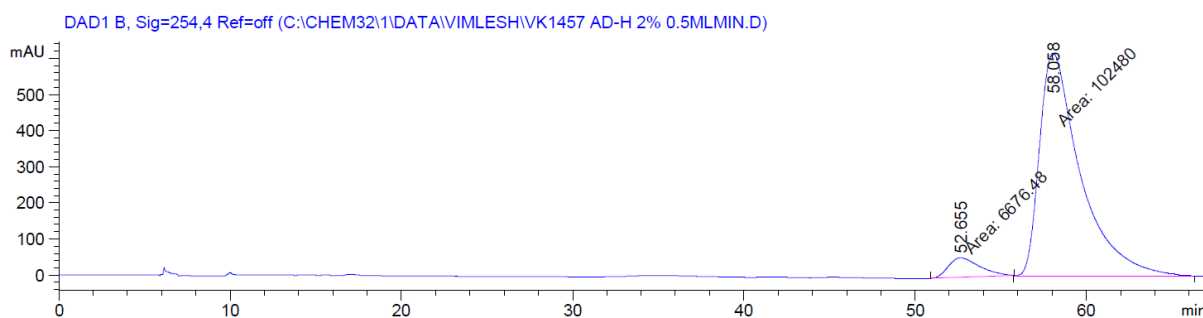

| Peak # | RetTime [min] | Type | Width [min] | Area [mAU*s] | Height [mAU] | Area %  |
|--------|---------------|------|-------------|--------------|--------------|---------|
| 1      | 52.655        | MM   | 2.0852      | 6676.47900   | 53.36424     | 6.1164  |
| 2      | 58.058        | MM   | 2.7680      | 1.02480e5    | 617.04022    | 93.8836 |



HPLC Chromatogram of Compound 4i (Racemic)

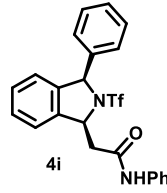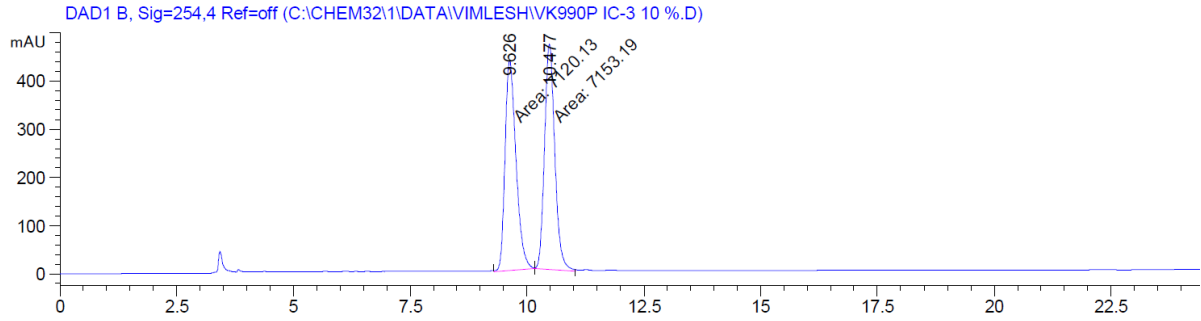

| Peak # | RetTime [min] | Type | Width [min] | Area [mAU*s] | Height [mAU] | Area %  |
|--------|---------------|------|-------------|--------------|--------------|---------|
| 1      | 9.626         | MM   | 0.2723      | 7120.13330   | 435.83905    | 49.8842 |
| 2      | 10.477        | MM   | 0.2550      | 7153.18945   | 467.51151    | 50.1158 |

HPLC Chromatogram of Compound 4i (Chiral)

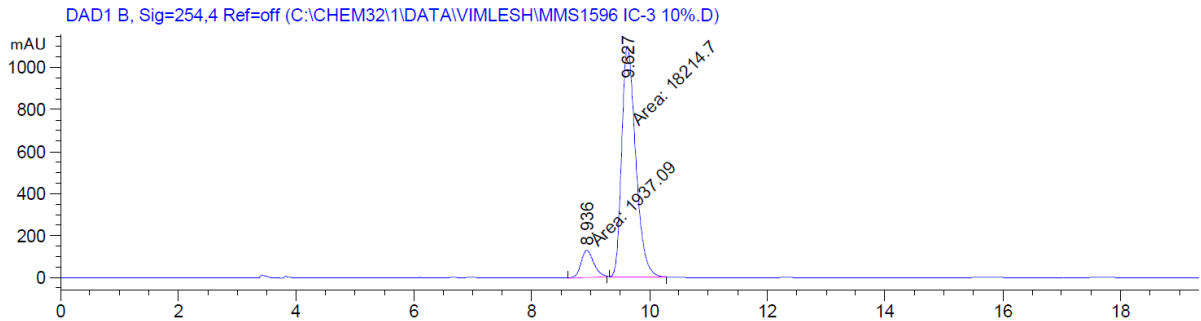

| Peak # | RetTime [min] | Type | Width [min] | Area [mAU*s] | Height [mAU] | Area %  |
|--------|---------------|------|-------------|--------------|--------------|---------|
| 1      | 8.936         | MM   | 0.2495      | 1937.09180   | 129.38841    | 9.6125  |
| 2      | 9.627         | MM   | 0.2763      | 1.82147e4    | 1098.87183   | 90.3875 |

HPLC Chromatogram of Compound 4j (Racemic)

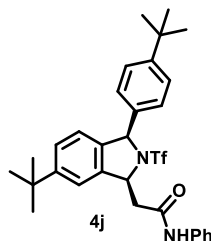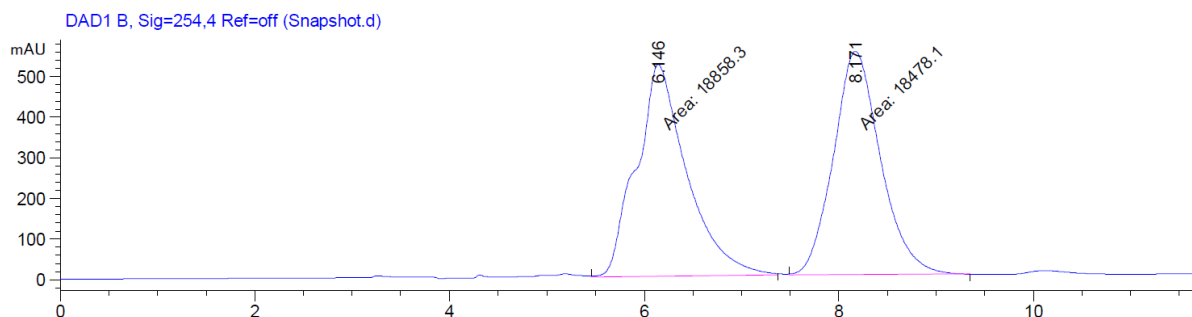

| Peak # | RetTime [min] | Type | Width [min] | Area [mAU*s] | Height [mAU] | Area %  |
|--------|---------------|------|-------------|--------------|--------------|---------|
| 1      | 6.146         | MM   | 0.6026      | 1.88583e4    | 521.60510    | 50.5093 |
| 2      | 8.171         | MM   | 0.5612      | 1.84781e4    | 548.78101    | 49.4907 |

HPLC Chromatogram of Compound 4j (Chiral)

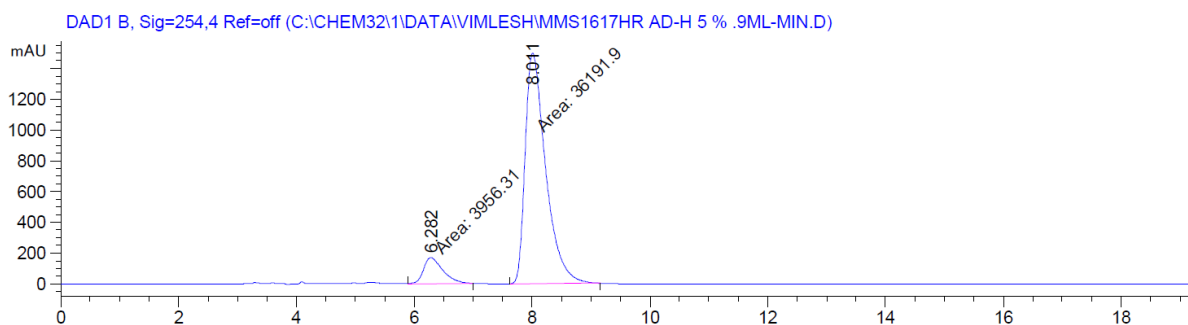

| Peak # | RetTime [min] | Type | Width [min] | Area [mAU*s] | Height [mAU] | Area %  |
|--------|---------------|------|-------------|--------------|--------------|---------|
| 1      | 6.282         | MM   | 0.3861      | 3956.31323   | 170.76566    | 9.8543  |
| 2      | 8.011         | MM   | 0.4021      | 3.61919e4    | 1500.10315   | 90.1457 |

HPLC Chromatogram of Compound 4k (Racemic)

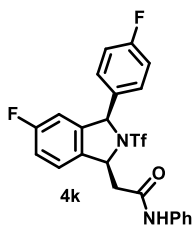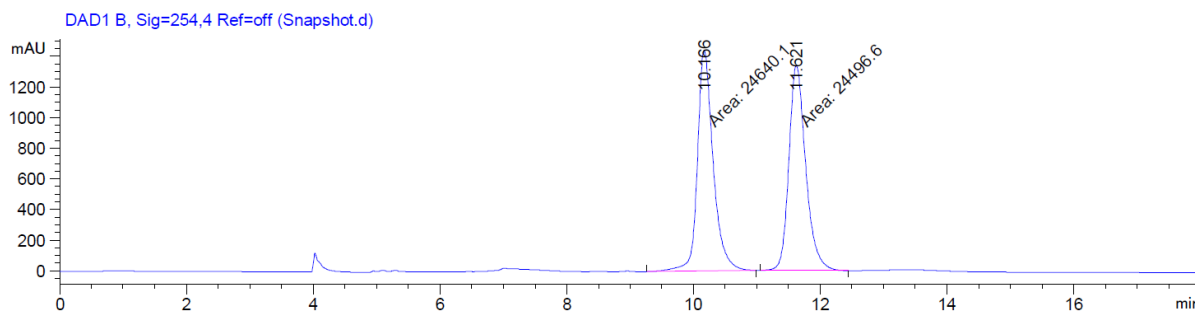

| Peak # | RetTime [min] | Type | Width [min] | Area [mAU*s] | Height [mAU] | Area %  |
|--------|---------------|------|-------------|--------------|--------------|---------|
| 1      | 10.166        | MM   | 0.2851      | 2.46401e4    | 1440.24182   | 50.1460 |
| 2      | 11.621        | MM   | 0.3057      | 2.44966e4    | 1335.60474   | 49.8540 |

HPLC Chromatogram of Compound 4k (chiral)

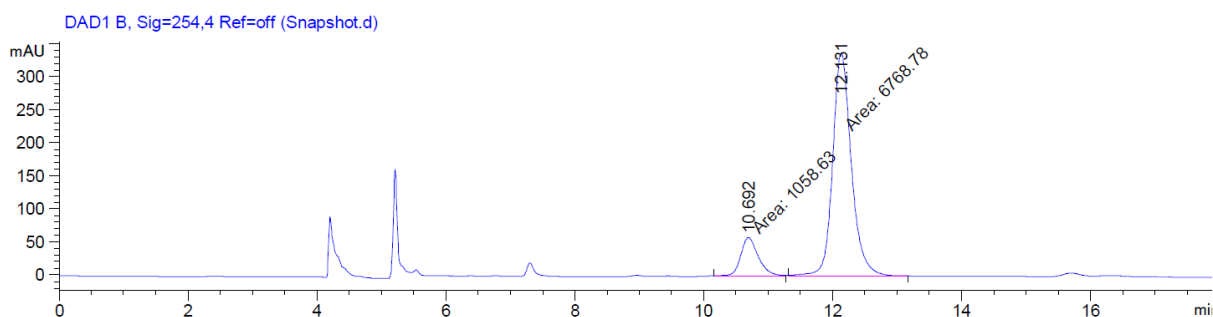

| Peak # | RetTime [min] | Type | Width [min] | Area [mAU*s] | Height [mAU] | Area %  |
|--------|---------------|------|-------------|--------------|--------------|---------|
| 1      | 10.692        | MM   | 0.3076      | 1058.63354   | 57.35867     | 13.5247 |
| 2      | 12.131        | MM   | 0.3344      | 6768.78467   | 337.38974    | 86.4753 |

### HPLC Chromatogram of Compound 4I (Racemic)

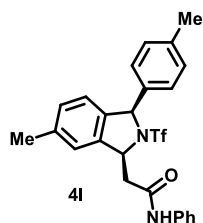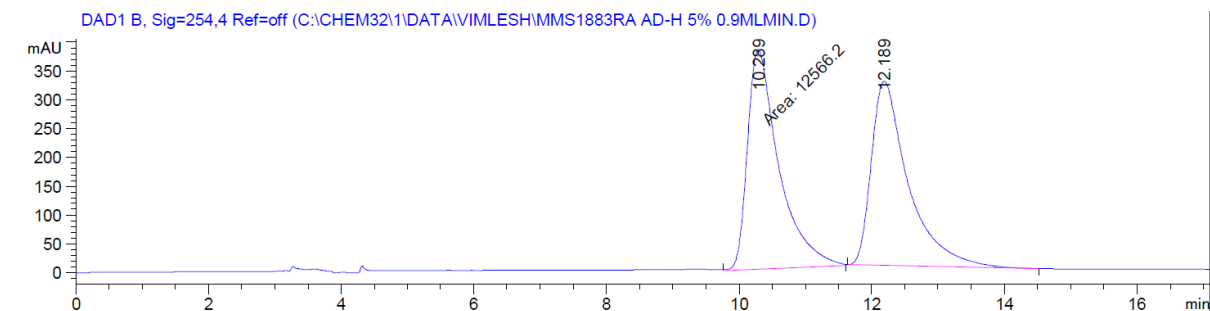

| Peak # | RetTime [min] | Type | Width [min] | Area [mAU*s] | Height [mAU] | Area %  |
|--------|---------------|------|-------------|--------------|--------------|---------|
| 1      | 10.289        | MM   | 0.5499      | 1.25662e4    | 380.89542    | 50.4109 |
| 2      | 12.189        | BB   | 0.5659      | 1.23613e4    | 319.09689    | 49.5891 |

### HPLC Chromatogram of Compound 4I (chiral)

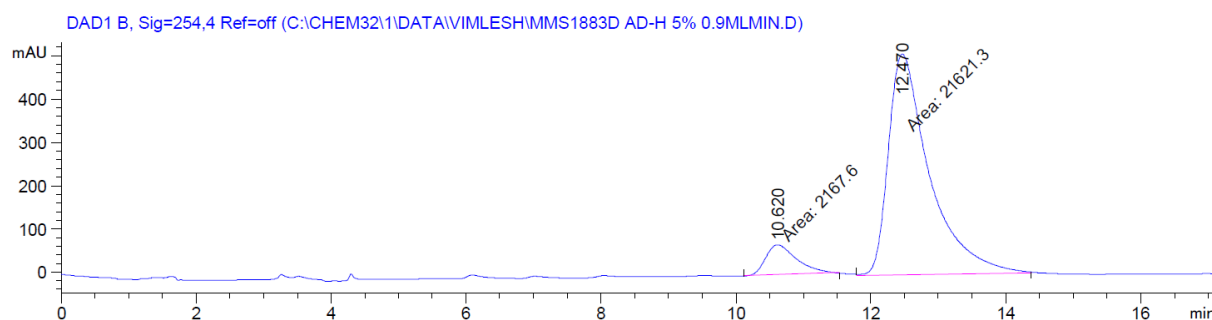

| Peak # | RetTime [min] | Type | Width [min] | Area [mAU*s] | Height [mAU] | Area %  |
|--------|---------------|------|-------------|--------------|--------------|---------|
| 1      | 10.620        | MM   | 0.5244      | 2167.60205   | 68.88584     | 9.1118  |
| 2      | 12.470        | MM   | 0.7063      | 2.16213e4    | 510.22293    | 90.8882 |

## 7. Crystallographic Data of 3a

Table 1

|                                   |                                                                  |
|-----------------------------------|------------------------------------------------------------------|
| Identification code               | UPS_UK_1163_0m_a                                                 |
| Empirical formula                 | C <sub>18</sub> H <sub>16</sub> F <sub>3</sub> NO <sub>3</sub> S |
| Formula weight                    | 383.38                                                           |
| Temperature                       | 124 K                                                            |
| Crystal system                    | orthorhombic                                                     |
| Space group                       | P212121                                                          |
| Unit cell dimensions              | a = 10.274(2) Å ;<br>α = 90 °                                    |
|                                   | b = 11.716(4) Å ;<br>β = 90 °                                    |
|                                   | c = 14.422(4) Å ;<br>γ = 90 °                                    |
| Volume                            | 1736.0(8) Å <sup>3</sup>                                         |
| Z                                 | 4                                                                |
| Density (calculated)              | 1.467 g/cm <sup>3</sup>                                          |
| Absorption coefficient            | 2.115 mm <sup>-1</sup>                                           |
| F(000)                            | 792.0                                                            |
| Crystal size                      | 0.343 × 0.32 × 0.12 mm <sup>3</sup>                              |
| Radiation                         | Cu Kα (λ = 1.54178)                                              |
| 2θ range for data collection      | 9.726 to 133.06                                                  |
| Index ranges                      | -12 ≤ h ≤ 12, -13 ≤ k ≤ 13, -17 ≤ l ≤ 17                         |
| Reflections collected             | 40412                                                            |
| Independent reflections           | 3009 [Rint = 0.0636, Rsigma = 0.0305]                            |
| Completeness of theta = 28.310°   | 98.00 %                                                          |
| Absorption correction             | Semi-empirical from equivalents                                  |
| Max. and min. transmission        | 0.508 and 0.776                                                  |
| Refinement method                 | Full-matrix least-square on F <sup>2</sup>                       |
| Data/restraints/parameters        | 3009/0/237                                                       |
| Goodness-of-fit on F <sup>2</sup> | 1.063                                                            |
| Final R indexes [I ≥ 2σ (I)]      | R1 = 0.0317, wR2 = 0.0847                                        |
| Final R indexes [all data]        | R1 = 0.0318, wR2 = 0.0848                                        |
| Largest diff. peak/hole           | 0.22/-0.30 Å <sup>-3</sup>                                       |

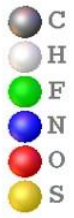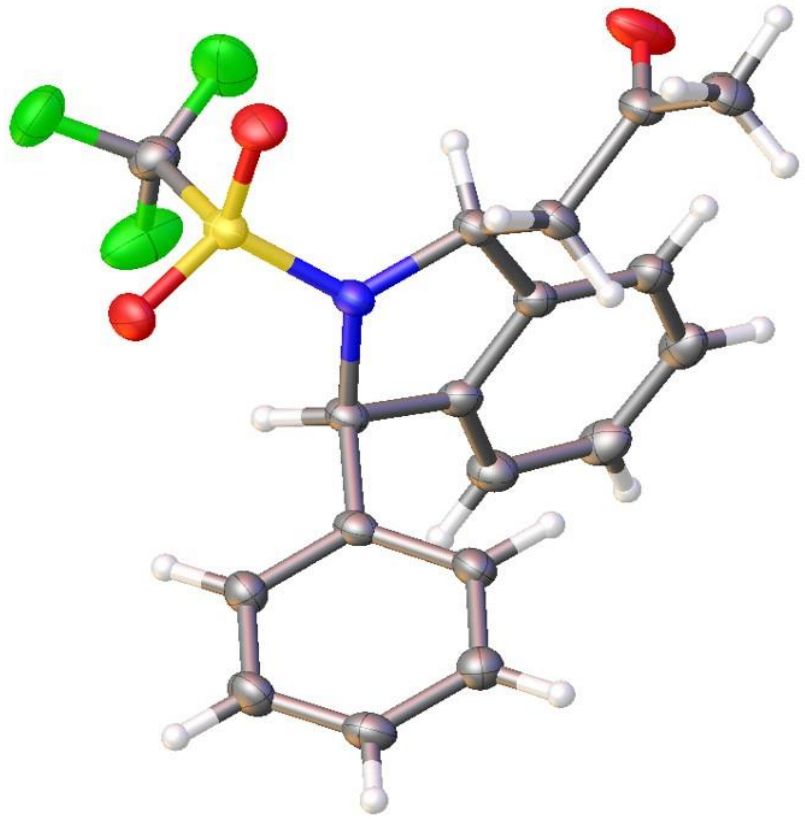

Table 2 Fractional Atomic Coordinates ( $\times 10^4$ ) and Equivalent Isotropic Displacement Parameters ( $\text{\AA}^2 \times 10^3$ ) for UPS\_UK\_1163\_0m\_a. Ueq is defined as 1/3 of the trace of the orthogonalised UIJ tensor.

| Atom | x           | y          | z          | U(eq)      |         |
|------|-------------|------------|------------|------------|---------|
| S11  | 9912.6(5)   | 5150.5(5)  | 5236.7(4)  | 23.3(2)    |         |
| O13  | 10666.2(16) |            | 5142.8(16) | 4406.9(12) | 31.0(4) |
| O12  | 10389.7(17) |            | 5649.5(16) | 6073.2(12) | 32.6(4) |
| F17  | 10898.0(17) |            | 3134.3(15) | 5570.6(14) | 47.2(5) |
| F15  | 9166(2)     | 3498.7(16) |            | 6339.7(13) | 54.1(5) |
| F16  | 9048(2)     | 3079.8(14) |            | 4887.1(14) | 54.0(5) |
| O9   | 7066(2)     | 6670.0(16) |            | 7604.5(12) | 43.4(5) |
| N2   | 8496.8(19)  |            | 5642.3(17) | 5023.8(12) | 22.1(4) |
| C3A  | 6415(2)     | 5243.1(19) |            | 4489.6(15) | 22.6(5) |
| C18  | 7998(2)     | 6234(2)    | 3386.7(14) |            | 21.8(5) |
| C3   | 7797(2)     | 5333.7(19) |            | 4138.4(14) | 21.7(5) |
| C21  | 8428(2)     | 7885(2)    | 2018.1(16) |            | 28.6(6) |
| C23  | 8888(2)     | 6035(2)    | 2680.7(17) |            | 26.5(5) |
| C7A  | 6294(2)     | 5661.8(19) |            | 5388.3(15) | 22.1(5) |
| C22  | 9108(3)     | 6857(2)    | 1998.7(17) |            | 30.6(6) |
| C9   | 7408(2)     | 7439(2)    | 7100.1(15) |            | 25.6(5) |
| C19  | 7307(2)     | 7265(2)    | 3394.0(15) |            | 25.7(5) |
| C4   | 5342(2)     | 4838(2)    | 4008.7(16) |            | 27.5(5) |
| C6   | 3997(2)     | 5331(2)    | 5332.7(18) |            | 30.5(6) |
| C7   | 5077(2)     | 5737(2)    | 5812.8(16) |            | 26.6(5) |
| C20  | 7525(2)     | 8080(2)    | 2715.1(16) |            | 27.7(5) |
| C1   | 7600(2)     | 5965(2)    | 5800.9(15) |            | 22.6(5) |
| C8   | 7770(2)     | 7217(2)    | 6088.0(15) |            | 25.4(5) |
| C5   | 4131(2)     | 4870(2)    | 4445.9(18) |            | 30.4(5) |
| C10  | 7507(3)     | 8652(2)    | 7429.7(17) |            | 31.4(6) |
| C14  | 9728(2)     | 3620(2)    | 5528.1(18) |            | 30.8(6) |

Table 3 Anisotropic Displacement Parameters ( $\text{\AA}^2 \times 10^3$ ) for UPS\_UK\_1163\_0m\_a. The Anisotropic displacement factor exponent takes the form:

$$-2\pi^2[h^2a^2U_{11}+2hka^*b^*U_{12}+\dots].$$

| Atom | U11      | U22      | U33      | U23      | U13       | U12      |
|------|----------|----------|----------|----------|-----------|----------|
| S11  | 17.5(3)  | 31.7(3)  | 20.8(3)  | -0.1(2)  | -0.1(2)   | -1.4(2)  |
| O13  | 22.2(8)  | 43.9(10) | 26.9(8)  | 1.9(8)   | 6.3(7)    | 1.7(8)   |
| O12  | 25.6(9)  | 43.3(10) | 29.0(9)  | -5.3(8)  | -8.0(7)   | -3.1(7)  |
| F17  | 38.8(9)  | 45.8(9)  | 57.0(11) | 7.7(8)   | -5.0(8)   | 14.9(7)  |
| F15  | 62.5(12) | 50.9(10) | 48.9(10) | 18.6(8)  | 21.7(10)  | 3.2(9)   |
| F16  | 65.6(12) | 32.8(8)  | 63.6(12) | 3.7(8)   | -31.6(10) | -8.0(8)  |
| O9   | 73.1(15) | 35.8(10) | 21.1(9)  | 0.8(8)   | 7.7(10)   | -4.1(10) |
| N2   | 20.4(10) | 29.7(10) | 16.1(9)  | -1.6(7)  | 0.2(8)    | 0.7(8)   |
| C3A  | 22.6(11) | 26.2(11) | 19.1(10) | 3.6(9)   | -0.8(9)   | -0.4(9)  |
| C18  | 20.1(11) | 29.7(11) | 15.4(10) | -1.2(9)  | -1.1(9)   | -1.9(9)  |
| C3   | 21.5(11) | 27.7(11) | 15.9(10) | -2.7(9)  | -0.8(8)   | -1.0(9)  |
| C21  | 31.2(13) | 35.6(13) | 19.0(11) | 2.6(9)   | 0.0(10)   | -3.6(10) |
| C23  | 25.1(12) | 31.5(12) | 22.8(12) | -1.0(9)  | 2.1(10)   | 2.8(9)   |
| C7A  | 21.3(11) | 26.5(11) | 18.6(11) | 2.1(9)   | -0.8(9)   | 1.0(9)   |
| C22  | 28.4(13) | 40.5(13) | 22.8(12) | 0.9(11)  | 6.5(10)   | 0.9(11)  |
| C9   | 27.0(12) | 32.6(12) | 17.4(10) | -0.7(11) | -0.7(10)  | 2.1(10)  |
| C19  | 26.0(12) | 33.1(12) | 17.8(10) | -2.0(9)  | 1.5(9)    | 2.5(10)  |
| C4   | 26.7(12) | 33.6(13) | 22.4(11) | -1.3(9)  | -2.5(9)   | -3.3(10) |
| C6   | 20.1(11) | 39.2(13) | 32.1(13) | 10.6(11) | 2.6(9)    | 1.1(10)  |
| C7   | 24.7(12) | 34.1(12) | 21.2(11) | 4.9(9)   | 1.5(10)   | 3.0(10)  |
| C20  | 27.7(13) | 30.7(11) | 24.8(12) | -0.2(10) | -1.4(11)  | 2.3(10)  |
| C1   | 21.5(11) | 29.7(11) | 16.5(10) | -0.2(8)  | 1.0(9)    | -0.5(9)  |
| C8   | 27.8(12) | 30.6(12) | 17.8(10) | -2.0(9)  | 4.1(10)   | -1.6(9)  |
| C5   | 21.1(11) | 37.6(13) | 32.6(12) | 5.1(11)  | -4.1(10)  | -3.7(10) |
| C10  | 38.2(15) | 35.1(13) | 20.8(11) | -6.8(11) | -0.8(10)  | -0.5(11) |
| C14  | 26.0(13) | 37.2(13) | 29.1(12) | 3.7(11)  | -3.2(11)  | 1.1(10)  |

Table 4 Bond Lengths for UPS\_UK\_1163\_0m\_a.

| Atom | Atom | Length/Å   | Atom | Atom | Length/Å |
|------|------|------------|------|------|----------|
| S11  | O13  | 1.4254(17) | C18  | C23  | 1.388(3) |
| S11  | O12  | 1.4274(18) | C18  | C19  | 1.401(3) |



|     |     |          |     |     |          |
|-----|-----|----------|-----|-----|----------|
| S11 | N2  | 1.594(2) | C21 | C22 | 1.393(4) |
| S11 | C14 | 1.851(3) | C21 | C20 | 1.386(3) |
| F17 | C14 | 1.331(3) | C23 | C22 | 1.396(4) |
| F15 | C14 | 1.313(3) | C7A | C7  | 1.395(3) |
| F16 | C14 | 1.321(3) | C7A | C1  | 1.510(3) |
| O9  | C9  | 1.210(3) | C9  | C8  | 1.528(3) |
| N2  | C3  | 1.510(3) | C9  | C10 | 1.502(3) |
| N2  | C1  | 1.499(3) | C19 | C20 | 1.386(3) |
| C3A | C3  | 1.511(3) | C4  | C5  | 1.395(3) |
| C3A | C7A | 1.391(3) | C6  | C7  | 1.392(4) |
| C3A | C4  | 1.386(3) | C6  | C5  | 1.395(4) |
| C18 | C3  | 1.527(3) | C1  | C8  | 1.535(3) |

Table 5 Bond Angles for UPS\_UK\_1163\_0m\_a.

| Atom | Atom | Atom | Angle/°    | Atom | Atom | Atom | Angle/°    |
|------|------|------|------------|------|------|------|------------|
| O13  | S11  | O12  | 121.71(11) | C7   | C7A  | C1   | 127.49(19) |
| O13  | S11  | N2   | 109.64(10) | C21  | C22  | C23  | 120.1(2)   |
| O13  | S11  | C14  | 103.89(11) | O9   | C9   | C8   | 121.2(2)   |
| O12  | S11  | N2   | 109.15(10) | O9   | C9   | C10  | 122.3(2)   |
| O12  | S11  | C14  | 103.89(12) | C10  | C9   | C8   | 116.5(2)   |
| N2   | S11  | C14  | 107.48(11) | C20  | C19  | C18  | 120.4(2)   |
| C3   | N2   | S11  | 120.73(15) | C3A  | C4   | C5   | 118.3(2)   |
| C1   | N2   | S11  | 120.51(15) | C7   | C6   | C5   | 120.6(2)   |
| C1   | N2   | C3   | 113.58(17) | C6   | C7   | C7A  | 118.3(2)   |
| C7A  | C3A  | C3   | 111.8(2)   | C19  | C20  | C21  | 120.5(2)   |
| C4   | C3A  | C3   | 127.1(2)   | N2   | C1   | C7A  | 101.07(17) |
| C4   | C3A  | C7A  | 121.1(2)   | N2   | C1   | C8   | 111.90(19) |
| C23  | C18  | C3   | 119.6(2)   | C7A  | C1   | C8   | 115.6(2)   |
| C23  | C18  | C19  | 119.0(2)   | C9   | C8   | C1   | 113.11(19) |
| C19  | C18  | C3   | 121.4(2)   | C4   | C5   | C6   | 120.9(2)   |
| N2   | C3   | C3A  | 100.43(16) | F17  | C14  | S11  | 109.40(18) |
| N2   | C3   | C18  | 111.74(18) | F15  | C14  | S11  | 110.62(18) |

|     |     |     |            |     |     |     |            |
|-----|-----|-----|------------|-----|-----|-----|------------|
| C3A | C3  | C18 | 114.45(19) | F15 | C14 | F17 | 108.1(2)   |
| C20 | C21 | C22 | 119.5(2)   | F15 | C14 | F16 | 109.8(2)   |
| C18 | C23 | C22 | 120.5(2)   | F16 | C14 | S11 | 111.07(17) |
| C3A | C7A | C7  | 120.7(2)   | F16 | C14 | F17 | 107.8(2)   |
| C3A | C7A | C1  | 111.8(2)   |     |     |     |            |

Table 6 Torsion Angles for UPS\_UK\_1163\_0m\_a.

| A               | B           | C           | D   | Angle/° | A         | B   | C   | D   | Angle/°   |
|-----------------|-------------|-------------|-----|---------|-----------|-----|-----|-----|-----------|
| S11 N2 C3       | C3A         | 142.96(16)  |     |         | C3 C3A C4 | C5  |     |     | -177.3(2) |
| S11 N2 C3       | C18         | -95.3(2)    | C3  | C18     | C23       | C22 |     |     | -178.5(2) |
| S11 N2 C1       | C7A         | -146.37(16) |     |         | C3        | C18 | C19 | C20 | 178.7(2)  |
| S11 N2 C1       | C8          | 90.0(2)     | C23 | C18     | C3        | N2  |     |     | 101.7(2)  |
| O13 S11 N2 C3   |             | 39.5(2)     | C23 | C18     | C3        | C3A |     |     | -145.0(2) |
| O13 S11 N2 C1   |             | -167.55(17) |     |         | C23       | C18 | C19 | C20 | -1.1(3)   |
| O13 S11 C14 F17 | 54.3(2)     | C7A         | C3A | C3      | N2        |     |     |     | 10.8(2)   |
| O13 S11 C14 F15 | 173.24(17)  |             |     |         | C7A       | C3A | C3  | C18 | -109.1(2) |
| O13 S11 C14 F16 | -64.5(2)    | C7A         | C3A | C4      | C5        |     |     |     | 0.6(4)    |
| O12 S11 N2 C3   | 175.11(16)  |             |     |         | C7A       | C1  | C8  | C9  | 92.1(2)   |
| O12 S11 N2 C1   | -31.9(2)    | C22         | C21 | C20     | C19       |     |     |     | 0.6(4)    |
| O12 S11 C14 F17 | -73.9(2)    | C19         | C18 | C3      | N2        |     |     |     | -78.0(3)  |
| O12 S11 C14 F15 | 45.0(2)     | C19         | C18 | C3      | C3A       |     |     |     | 35.3(3)   |
| O12 S11 C14 F16 | 167.23(19)  |             |     |         | C19       | C18 | C23 | C22 | 1.3(3)    |
| O9 C9 C8 C1     | 2.1(3)      | C4          | C3A | C3      | N2        |     |     |     | -171.2(2) |
| N2 S11 C14 F17  | 170.48(17)  |             |     |         | C4        | C3A | C3  | C18 | 69.0(3)   |
| N2 S11 C14 F15  | -70.60(19)  |             |     |         | C4        | C3A | C7A | C7  | -3.2(3)   |
| N2 S11 C14 F16  | 51.6(2)     | C4          | C3A | C7A     | C1        |     |     |     | 175.4(2)  |
| N2 C1 C8 C9     | -152.93(19) |             |     |         | C7        | C7A | C1  | N2  | 177.4(2)  |
| C3A C7A C7      | C6 3.2(3)   | C7          | C7A | C1      | C8        |     |     |     | -61.6(3)  |
| C3A C7A C1      | N2 -1.1(2)  | C7          | C6  | C5      | C4        |     |     |     | -2.0(4)   |
| C3A C7A C1      | C8 119.9(2) | C20         | C21 | C22     | C23       |     |     |     | -0.4(4)   |
| C3A C4 C5       | C6 2.0(4)   | C1          | N2  | C3      | C3A       |     |     |     | -11.7(2)  |
| C18 C23 C22     | C21 -0.5(4) | C1          | N2  | C3      | C18       |     |     |     | 110.0(2)  |

C18 C19 C20 C21 0.2(4) C1 C7A C7 C6 -175.2(2)  
 C3 N2 C1 C7A 8.4(2) C5 C6 C7 C7A -0.6(3)  
 C3 N2 C1 C8 -115.2(2) C10 C9 C8 C1 -178.2(2)  
 C3 C3A C7A C7 175.0(2) C14 S11 N2 C3 -72.82(19)  
 C3 C3A C7A C1 -6.5(3) C14 S11 N2 C1 80.14(19)

Table 7 Hydrogen Atom Coordinates ( $\text{\AA} \times 10^4$ ) and Isotropic Displacement Parameters ( $\text{\AA}^2 \times 10^3$ ) for UPS\_UK\_1163\_0m\_a.

| Atom         | x    | y    | z    | U(eq) |         |
|--------------|------|------|------|-------|---------|
| H3           | 8101 |      | 4573 | 3911  | 26      |
| H21          | 8580 |      | 8449 | 1557  | 34      |
| H23          | 9349 |      | 5333 | 2662  | 32      |
| H22          | 9724 |      | 6716 | 1521  | 37      |
| H19          | 6684 |      | 7406 | 3867  | 31      |
| H4           | 5429 |      | 4547 | 3397  | 33      |
| H6           | 3160 |      | 5368 | 5611  | 37      |
| H7           | 4987 |      | 6058 | 6414  | 32      |
| H20          | 7053 |      | 8777 | 2728  | 33      |
| H1           | 7774 |      | 5462 | 6347  | 27      |
| H8A          | 8688 |      | 7443 | 5988  | 31      |
| H8B          | 7220 |      | 7702 | 5685  | 31      |
| H5           | 3389 |      | 4574 | 4136  | 37      |
| H10A         | 6934 |      | 9137 | 7056  | 47      |
| H10B         | 8408 |      | 8917 | 7366  | 47      |
| H10C         |      |      |      |       |         |
| Experimental |      | 7245 |      | 8695  | 8082 47 |
